# Supplementary material for: A chemical biology approach reveals a dependency of glioblastoma on biotin distribution
Source: PubMed Central journal article supplement — Sci Adv. 2021 Sep 3;7(36):eabf6033. doi: 10.1126/sciadv.abf6033 (PMC8442857; doi:10.1126/sciadv.abf6033), 2021-09-03
Supplement: sciadv.abf6033_sm.pdf [file sciadv.abf6033_sm.pdf]

## Supplementary Materials for

### **A chemical biology approach reveals a dependency of glioblastoma on biotin distribution**

Jeehyun Yoon, Oleg V. Grinchuk, Srinivasaraghavan Kannan, Melgious Jin Yan Ang, Zhenglin Li, Emmy Xue Yun Tay, Ker Zhing Lok, Bernice Woon Li Lee, You Heng Chuah, Kimberly Chia, Roberto Tirado Magallanes, Chenfei Liu, Haonan Zhao, Jin Hui Hor, Jhin Jieh Lim, Touati Benoukraf, Tan Boon Toh, Edward Kai-Hua Chow, Jean-Paul Kovalik, Jianhong Ching, Shi-Yan Ng, Ming Joo Koh, Xiaogang Liu, Chandra Shekhar Verma, Derrick Sek Tong Ong\*

\*Corresponding author. Email: [phsostd@nus.edu.sg](mailto:phsostd@nus.edu.sg)

Published 3 September 2021, *Sci. Adv.* 7, eabf6033 (2021)  
DOI: 10.1126/sciadv.abf6033

#### **This PDF file includes:**

Supplementary Materials and Methods  
Figs. S1 to S8  
Tables S1 to S4  
Data S1 to S4  
References

## **Materials and Methods**

### Unsupervised clustering of glioma patients based on query gene signature

We selected two gene sets from Molecular Signatures Database (MSigDB, Broad institute, <https://www.gsea-msigdb.org/gsea/msigdb/>), namely, “KOBAYASHI\_EGFR\_SIGNALING\_24HR\_DN” and “VERHAAK\_GLIOMASTOMA\_MESENCHYMAL”, and another gene set under Gene Ontology term “GO:0048699: Generation of neurons”, hereafter termed as “EGFR signaling”, “Mesenchymal subtype of GBM” and “Generation of neurons”, respectively. Next, we filtered genes in these gene sets through an in-house RNA-Seq dataset, which was generated from the depletion of histone variant *H2AFV* in GSCs, as this led to decreased proliferation, stemness and invasiveness of GSCs (hereafter known as query signature) (**Table S1**). We checked whether the signature could stratify glioma patients into the clinically distinct subgroups using hierarchical clustering. Glioma patient’s tumor gene expression data (TCGA cohort) were obtained from GlioVis (44) (<http://gliovis.bioinfo.cnio.es/>). The resulting expression matrix was drawn in R as a heatmap (45), applying hierarchical clustering with Pearson correlation distance. Elbow and Gap-statistic methods were implemented to determine the optimal number of groups from the clustering, using the functions from the R library factextra (version 1.0.5). Sample information on “co-deletion status of 1p-19q”, “IDH mutation status” and “tumor grade” was extracted from the metadata files downloaded from GlioVis and annotated accordingly in the heatmap. Kaplan–Meier curves and risk tables were drawn with the function kmTCGA from the library RTCGA (version 1.14.0) using as input the survival information for the patient samples in the clinical metadata. Statistical tests for survival differences between the 3 groups were calculated in a pairwise manner using the function coxph from the R library “survival”. The resulting p-values were adjusted for multiple testing using the Benjamini-Hochberg procedure.

### Lentiviral Constructs

The shRNAs against human HLCS (shHLCS#1, TRCN0000233102 and shHLCS#2, TRCN0000233105), human PC (shPC#1, TRCN0000078453 and shPC#2, TRCN0000078454), human ACC1 (shACC1#1, TRCN0000232455 and shACC#2, TRCN0000232456), human ACC2 (shACC2#1, TRCN0000003093 and shACC2#2, TRCN0000010759), human MCCC1 (shMCCC1#1, TRCN0000078413 and TRCN0000078415) and human PCCA (shPCCA#1, TRCN0000078425 and shPCCA#2, TRCN0000078427) were purchased from Sigma. GSCs were transduced with viral particles. Down-regulation of the target was evaluated by western blot at 72 hr post-infection.

### RNA interference

GSCs were seeded in plates the day before transfection. RNAiMAX (Invitrogen, 13778150) was used to transfect 25 nM of human CYP51A1 siRNA (Dharmacon, L-009215-01-0005) into the cells for 72 h.

### Cell Viability Assay

Cell-Titer Glow (Promega) was used to determine cell proliferation rate. Briefly, GSCs and mouse astrocytes were seeded on the 96 wells, following day cells were treated with different inhibitors. Cell viability assay was performed 3 days after with Cell-Titre Glow. Data was normalized to DMSO treatment.

### Tumorsphere Formation and Extreme Limiting Dilution Assays

The tumorsphere formation assay involved seeding GSCs at a density of 1-2 cell per  $\mu\text{l}$  with each condition of SN, and the number of tumorspheres in each well was quantified after 5 days. Data presented are from triplicate experiments.

For the extreme limiting dilution assay, GSCs were stained with PI, and PI-negative cells ( $n > 6$ ) were flow-sorted with decreasing number of cells per well (1, 10, 25 and 100 for TS543, 5, 25, 100 and 200 for TS603) plated in 96-well plates. The percentage of wells with tumorspheres was quantified after 7 days under a microscope. Extreme limiting dilution analysis was performed using software available at <http://bioinf.wehi.edu.au/software/elda/>. The tumorsphere formation assay involved seeding GSCs at a density of 1 cell per  $\mu\text{l}$ , and the number of tumorspheres in each well was quantified after 7 days.

#### Anchorage-Independent Growth Assay

Anchorage-independent growth assays were performed in replicates of 4 in 6-well plates. Indicated cells were seeded ( $1 \times 10^4$  cells per well) in stem cell proliferation media with EGF and FGF containing 0.5% low-melting agarose on the top of bottom agar containing 1% low-melting agarose stem cell proliferation media with EGF and FGF. After 14 – 21 days, colonies were stained with iodinitrotetrazoliumchloride (Sigma) and counted.

#### Transwell migration and invasion assay

The invasiveness of GSCs was measured using 6.5 mm Transwell with 8.0  $\mu\text{m}$  pore polycarbonate membrane insert (Corning, CLS3422). Membrane was coated with Matrigel Basement Membrane Matrix (100  $\mu\text{g}/\text{cm}^2$ ) (BD Biosciences). The drug-treated cells were seeded in the upper compartment with serum-free GSC medium. The wells of the lower chamber were filled with GSC medium containing 10% FBS. At the end of the invasion assay, chambers were removed, fixed, and stained with a 0.5% Crystal Violet. Cells on the upper surface of the filters were removed by wiping with a cotton swab, and invasion was determined by counting the cells that migrated to the bottom side of the filter using at least ten fields per insert at  $20\times$  magnification. Data presented are from triplicate experiments.

#### RNA Isolation and qRT-PCR

RNA was isolated with RNeasy® Micro Kit (Qiagen), and then used for first-strand cDNA synthesis using random primers and SuperScriptIII Reverse Transcriptase (Invitrogen). qRT-PCR was performed using PowerUp™ SYBR® Green Master Mix (Applied Biosystems). Primers are listed in **Table S4**. The relative expression of genes was normalized using the indicated housekeeping genes.

#### Western blot analysis and antibodies

Cell lysates were prepared in RIPA buffer (Thermo) with protease inhibitor (Roche), and phosphatase inhibitor (Roche). Protein concentration was determined by DC Protein Assay (Bio-rad), and equal amount of protein samples was used to perform SDS gel electrophoresis and transferred onto nylon membranes (Bio-rad). TBST with 5% skim milk was used for blocking. Incubation with primary antibody was performed at 4 °C for 16 hours. The following antibodies were used: SREBP2 (Abcam, ab30682), phospho-ACC (Cell Signaling, 11818), ACC (Cell Signaling, 3676), Phospho-AMPK (Cell Signaling, 2535), AMPK (Cell signaling, 2532), MCCC1 (Proteintech, 14861-1-AP), PC (Novus, NBP1-49536), PCCA (Novus, NBP2-13736), H3K27ac (Abcam, ab4729), H3 (Abcam, ab1791), Pyruvate Dehydrogenase E1-alpha subunit [p Ser293]

(Novus, NB110-93479), HLCS (Novus, NBP1-81759), Cleaved-Caspase-3 (ASP-175) (Cell Signaling, 9661), H2A (Abcam, ab18255), H4 (Abcam, ab7311), Vinculin (Sigma, V9131) and  $\beta$ -actin (Sigma, A5316), HRP-linked anti-rabbit IgG antibody (Cell Signaling, 7074), HRP-linked anti-mouse IgG antibody (Cell Signaling, 7076). Quantification of protein expression was performed using Image J, and either Vinculin or  $\beta$ -actin was used as the loading control for protein normalization.

#### Chemical synthesis of biotin-sulconazole (BSN)

Unless otherwise noted, transformations were performed with distilled and degassed solvents under an atmosphere of dry N<sub>2</sub> in oven-dried (120 °C) glassware with standard dry box or vacuum line techniques. <sup>1</sup>H NMR spectra were recorded on a Bruker AV500 (500 MHz) spectrometer. Chemical shifts are reported in ppm from tetramethylsilane with the solvent resonance resulting from incomplete deuterium incorporation as the internal standard (DMSO-d<sub>6</sub>:  $\delta$  2.50 ppm). Data are reported as follows: chemical shift, integration, multiplicity (s = singlet, d = doublet, t = triplet, q = quartet, br = broad, m = multiplet), and coupling constants (Hz). <sup>13</sup>C NMR spectra were recorded on a Bruker AV500 (126 MHz) spectrometers with complete proton decoupling. Chemical shifts are reported in ppm from tetramethylsilane with the solvent resonance as the internal standard (DMSO-d<sub>6</sub>:  $\delta$  39.52 ppm). High-resolution mass spectrometry was performed on a Bruker micrOTOFQ II ESI-MS (positive mode) at the NUS Chemical, Molecular and Materials Analysis Centre.

#### *Solvents*

Solvents (tetrahydrofuran and dichloromethane) were purified under a positive pressure of dry nitrogen gas by a modified Innovative Technologies purification system. N,N-dimethylformamide (anhydrous) was used as received. All purification procedures of products were carried out with reagent grade solvents (purchased from VWR chemicals) under bench-top conditions.

#### *Reagents*

4-[(tert-Butyldimethylsilyl)oxy]benzaldehyde (1, Sigma-Aldrich), 1-(2,4-dichlorophenyl)-2-(1H-imidazol-1-yl)ethan-1-ol (4, Combi-blocks), thioacetic acid (Sigma-Aldrich), diisopropyl azodicarboxylate (Combi-blocks), triphenylphosphine (Strem), lithium aluminium hydride (Alfa Aesar), thionyl chloride (Sigma-Aldrich), sodium hydride (Strem), tetrabutylammonium fluoride (Sigma-Aldrich), D-biotin (Accela), and 1-(3-dimethylaminopropyl)-3-ethylcarbodiimide hydrochloride (Combi-blocks) were used as received.

(4-((tert-Butyldimethylsilyl)oxy)phenyl)methanethiol (3)<sup>1</sup> and 1-(2-chloro-2-(2,4-dichlorophenyl)ethyl)-1H-imidazole (5)<sup>2</sup> were prepared in analogy to reported procedures.

**4-(((1-(2,4-Dichlorophenyl)-2-(1H-imidazol-1-yl)ethyl)thio)methyl)phenol (7):** To an oven-dried flask was charged with DMF (5 mL) and NaH (88 mg, 60%, 2.2 mmol, 1.1 equiv). 3 (508 mg, 2.0 mmol, 1.0 equiv) was added dropwise to the suspension via syringe at 0 °C. After the reaction mixture was allowed to stir for 30 min, 5 (550 mg, 2.0 mmol, 1.0 equiv) was added dropwise. The reaction mixture was allowed to stir for another 12 h at ambient temperature before being quenched by saturated aqueous NH<sub>4</sub>Cl (10 mL) and Et<sub>2</sub>O (10 mL). The organic phase was then separated, washed with brine (10 mL x 3) and then dried over anhydrous Na<sub>2</sub>SO<sub>4</sub>. After removal of solvent, residues were dissolved in THF (5 mL) and TBAF (4.0 mL, 1 M in THF, 4.0 mmol, 2.0 equiv) was added. The reaction mixture was allowed to stir for 3 h at ambient

temperature before being quenched by saturated aqueous NH<sub>4</sub>Cl (10 mL) and Et<sub>2</sub>O (10 mL). The organic phase was then separated, washed with brine (10 mL x 3) and then dried over anhydrous Na<sub>2</sub>SO<sub>4</sub>. After removal of solvent, the residues were purified by silica gel chromatography (hexane/EtOAc 1:1 – hexane/EtOAc 1:4) to afford 7 (462 mg, 1.2 mmol, 60% yield) as pale yellow powder.

**<sup>1</sup>H NMR (500 MHz, DMSO-d<sub>6</sub>):** δ 9.41 (s, 1H), 7.57 (d, J = 8.4 Hz, 1H), 7.52 (d, J = 2.4 Hz, 1H), 7.46 – 7.36 (m, 2H), 7.07 (d, J = 8.4 Hz, 2H), 6.95 (s, 1H), 6.78 (s, 1H), 6.69 (d, J = 8.4 Hz, 2H), 4.56 – 4.38 (m, 3H), 3.70 (d, J = 12.8 Hz, 1H), 3.57 (d, J = 12.8 Hz, 1H); **<sup>13</sup>C NMR (126 MHz, DMSO-d<sub>6</sub>):** δ 156.49, 137.42, 135.63, 133.91, 132.66, 130.31, 130.10, 128.88, 128.27, 127.64, 127.24, 119.39, 115.21, 49.12, 44.74, 34.87; **HRMS (ESI) [M+H]<sup>+</sup>** calcd for C<sub>18</sub>H<sub>17</sub>Cl<sub>2</sub>N<sub>2</sub>O<sub>5</sub><sup>+</sup>: 379.0433, found: 379.0441. The NMR spectra are shown in **Data S1 and S2**.

**4-(((1-(2,4-Dichlorophenyl)-2-(1H-imidazol-1-yl)ethyl)thio)methyl)phenyl 5-((3aS,4S,6aR)-2-oxohexahydro-1H-thieno[3,4-d]imidazol-4-yl)pentanoate (8):** To an oven dried flask was charged with DMF (2 mL), 7 (100 mg, 0.26 mmol, 1.0 equiv), D-biotin (76 mg, 0.31 mmol, 1.2 equiv) and EDCI (60 mg, 0.31 mmol, 1.2 equiv). The reaction mixture was allowed to stir for 12 h at ambient temperature before being quenched by saturated aqueous NH<sub>4</sub>Cl (10 mL) and Et<sub>2</sub>O (10 mL). The organic phase was then separated, washed with brine (10 mL x 3) and then dried over anhydrous Na<sub>2</sub>SO<sub>4</sub>. After removal of solvent, the residues were purified by silica gel chromatography (hexane/EtOAc 1:1 – hexane/EtOAc 1:2) to afford 8 (80 mg, 0.13 mmol, 50% yield) as pale yellow powder.

**<sup>1</sup>H NMR (500 MHz, DMSO-d<sub>6</sub>):** δ 7.58 (d, J = 8.6 Hz, 1H), 7.51 (d, J = 2.3 Hz, 1H), 7.46 – 7.39 (m, 2H), 7.31 (d, J = 8.5 Hz, 2H), 7.05 (d, J = 8.2 Hz, 2H), 6.97 (s, 1H), 6.78 (s, 1H), 6.47 (s, 1H), 6.38 (s, 1H), 4.56 – 4.45 (m, 3H), 4.34 – 4.29 (m, 1H), 4.18 – 4.13 (m, 1H), 3.81 (d, J = 13.2 Hz, 1H), 3.69 (d, J = 13.2 Hz, 1H), 3.14 (dt, J = 8.4, 5.8 Hz, 1H), 2.83 (dd, J = 12.4, 5.2 Hz, 1H), 2.62 – 2.53 (m, 3H), 1.70 – 1.39 (m, 6H); **<sup>13</sup>C NMR (126 MHz, DMSO-d<sub>6</sub>):** δ 171.71, 162.73, 149.47, 135.41, 135.08, 133.94, 132.76, 130.29, 130.01, 128.90, 128.31, 127.66, 121.80, 119.41, 115.21, 61.04, 59.21, 55.31, 49.06, 44.71, 34.54, 33.30, 27.99, 27.93, 24.37; **HRMS (ESI) [M+H]<sup>+</sup>** calcd for C<sub>28</sub>H<sub>31</sub>Cl<sub>2</sub>N<sub>4</sub>O<sub>3</sub>S<sub>2</sub><sup>+</sup>: 605.1209, found: 605.1217. The NMR spectra are shown in **Data S3 and S4**.

#### Model generation for Molecular Dynamics (MD) Simulation

A crystal structure of the human biotin carboxylation (BC) domain of ACCA (PDB: 2YL2, 2.3 Å) was used for the modelling studies. Missing residues were built using the crystal structure of the E. coli biotin carboxylase (complex with Benzimidazoles) (PDB: 3JZF, 2.1 Å), which shares 52% similarity within the BC domains. A molecule of ATP docked into this model of the BC domain was generated guided by a structure of the ADP-bound BC domain from E. coli (complex with ADP and Biotin) (PDB: 3G8C, 2.0 Å). There are no available crystal structures of MCC1, PC and PCCA. Homology models (46) of these structures were built using the crystal structure of E. coli BC used above (the 3 proteins share sequence similarities with the E. coli sequence of 67%, 64% and 67% respectively).

#### *Ligand preparation and docking*

The 3D structure of the ligand sulconazole were built using the Maestro software and minimized using the MacroModel module employing the OPLS-2005 force field in the Schrodinger 9.0 suite of programs. This ligand was then prepared with Ligprep for docking. Sulconazole was next docked into the biotin-binding pocket of the models of ACCA, MCC1, PC and PCCA constructed

above using the program Glide. The search space of the docked ligand was restricted to a cubic box with 10 Å sides centred on the selected active site residues. Default Glide settings were used to generate these grids. The docking was carried out by holding the proteins rigid while the ligand was flexible. Several docked conformations of the ligand were generated and their interactions evaluated using the Glide Extra Precision (XP) scoring function. The pose that was commonly observed in all the docking runs (i.e. docking sulconazole into the BC domains of ACCA, MCC1, PC and PCCA) was selected for further refinement using molecular dynamics (MD) simulations as detailed next.

### *MD simulations*

MD simulations of sulconazole complexed to the BC domains of ACCA/ PC/ MCC1/ PCCA as generated above were carried out with the pemed.CUDA module of the program Amber18. All atom versions of the Amber 14SB force field (ff14SB) and the general Amber force field (GAFF) were used for the protein and for sulconazole, respectively. The Xleap module of Amber18 was used to prepare the system for the MD simulations as used earlier (47, 48). All the simulation systems were neutralized with appropriate numbers of counterions. Each neutralized system was solvated in an octahedral box with TIP3P water molecules, leaving at least 10 Å between the solute atoms and the borders of the box. All MD simulations were carried out in explicit solvent at 300K. During the simulations, the long-range electrostatic interactions were treated with the particle mesh Ewald method (49) using a real space cutoff distance of 9 Å. The Settle algorithm (50) was used to constrain bond vibrations involving hydrogen atoms, which allowed a time step of 2 fs during the simulations. Solvent molecules and counterions were initially relaxed using energy minimization with restraints on the protein and sulconazole atoms. This was followed by unrestrained energy minimization to remove any steric clashes. Subsequently the system was gradually heated from 0 to 300 K using MD simulations with positional restraints (force constant: 50 kcal mol<sup>-1</sup> Å<sup>-2</sup>) on protein and sulconazole over a period of 0.25 ns allowing water molecules and ions to move freely. During an additional 0.25 ns, the positional restraints were gradually reduced followed by a 2 ns unrestrained MD simulation to equilibrate all the atoms. For each system, three independent MD simulations (assigning different initial velocities) were carried out for 250 ns with conformations saved every 10 ps. Simulation trajectories were visualized using VMD and figures were generated using Pymol.

### RNA-Seq analysis

GSC TS543 were treated with either DMSO or 5µM sulconazole for 3 days, followed by RNA extraction. The total RNA samples were sent to Medgenome (Medgenome, India, Bangalore) for RNA-Seq analysis on the Illumina HiSeq platform according to the standard paired-end protocol. RNA-seq data quality was monitored via FASTQC package (<https://www.bioinformatics.babraham.ac.uk/projects/fastqc/>). Adapters and overrepresented sequences have been removed using cutadapt software (<https://cutadapt.readthedocs.io/en/stable/>). Further reads preprocessing was performed by Trimmomatic (version 0.36) with the parameters: LEADING:3 TRAILING:3 SLIDINGWINDOW:4:15 MINLEN:50. Mapping of RNA-seq reads was done using STAR\_2.5.0a (<https://github.com/alexdobin/STAR>) with default parameters for RNA-seq data; the human ENSEMBL gene annotation model (GRCh37) and RSEM software (44) were used to quantify the gene-level expression. EBSeq package was utilized for differential gene expression analysis (51). Pathway enrichment analysis was performed using ConsensusPathDB (<http://cpdb.molgen.mpg.de/>). The differentially expressed genes are listed in **Table S2**.

### Extraction of amino acids, acylcarnitines and organic acids and their analyses

GSC TS543 was treated with 1 mM L-carnitine for 24 hrs prior to acylcarnitine extraction. We have checked that the acylcarnitine treatment did not affect the effect of sulconazole on the GSC TS543 cell viability. Methods of extraction and metabolic profiling for amino acid, acylcarnitines and organic acids were performed as previously described (52, 53). For acyl carnitine and amino acid extraction, 50  $\mu$ L of the cell lysate was spiked with deuterium-labeled acylcarnitine and amino acid standards, (including D3-C2, D3-C3, D3-C4, D9-C5, D3-C8, and D3-C16 carnitines (Cambridge Isotope Laboratories, Andover, MA) and Glycine-D2, Alanine-D4, Valine-D8, Proline-D7, Serine-D3, Leucine-D3, Methionine-D3, Phenylalanine-D5, Histidine-D6, Tyrosine-D4, Aspartic acid-D3, Glutamic acid-D3, Ornithine-D2, Citrulline-D2, Arginine-D5 and Tryptophan-D5 (Sigma Aldrich, USA)). The mixture was extracted using methanol. The acyl carnitine and amino acid extracts were derivatised with 3M Hydrochloric acid in methanol or butanol (Sigma Aldrich, USA) respectively, dried and reconstituted in methanol for analysis in LC-MS.

Acylcarnitine measurements were performed without a column, using flow injection tandem mass spectrometry on the Agilent 6430 Triple Quadrupole LC/MS system (Agilent Technologies, CA, USA). The sample analysis was carried out at 0.4 ml/min of 80/20 Methanol/water as mobile phase, and injection of 4  $\mu$ L of sample. Data acquisition and analysis were performed on Agilent MassHunter Workstation B.06.00 Software.

Amino acids were separated using a C18 column (Phenomenex, 100 x 2.1 mm, 1.6  $\mu$ m, Luna<sup>®</sup> Omega) on a Agilent 1290 Infinity LC system (Agilent Technologies, CA, USA) coupled with quadrupole-ion trap mass spectrometer (QTRAP 5500, AB Sciex, DC, USA). Mobile phase A (Water) and Mobile phase B (Acetonitrile) both containing 0.1% Formic acid were used for chromatography separation. The LC run was performed at a flow rate of 0.4 mL min<sup>-1</sup> with initial gradient of 2% B for 0.8 min, then increased to 15% B in 0.1 min, 20% B in 5.7 min, 50% B in 0.5 min, 70% B in 0.5 min, followed by re-equilibration of the column to the initial run condition (2% B) for 0.9 min. All compounds were ionized in positive mode using electrospray ionization. The chromatograms were integrated using MultiQuant<sup>™</sup> 3.0.3 software (AB Sciex, DC, USA). Absolute quantitation of both amino acids and acylcarnitines were done by comparing the ratios of the metabolites to their respective internal standards, against an external calibration curve. External calibration curves consisted of C2, C3, C4, C5, C6, C8, C10, C12, C14, C16 and C18 carnitines and all reported amino acids. As no column separation was used for the acylcarnitine analysis, isomers were unable to be separated. Isomeric acylcarnitines such as valerylcarnitine and isovalerylcarnitine were reported as the sum of both the acylcarnitine species.

For organic acid analysis, 300  $\mu$ L of homogenate was spiked with deuterated internal standards of each metabolite analysed, extracted with ethylacetate, dried and derivatized with N,O-Bis(trimethylsilyl)trifluoroacetamide, with protection of the alpha keto groups using ethoxyamine (Sigma Aldrich, USA). Trimethylsilyl derivatives of organic acids were separated by gas chromatography on an Agilent Technologies HP 7890A and quantified by selected ion monitoring on a 5975C mass spectrometer using stable isotope dilution. The initial GC oven temperature was set at 70 °C, and ramped to 300 °C at a rate of 40 °C/min, and held for 2 min.

We applied the following criteria for the organic acid, amino acid and acylcarnitine analyses: (i) signal/noise ratio > 3 in all measurements for a given cell line; and (ii) signal/noise ratio > 10 in at least three out of six measurements for a given cell line. Relative fold changes are shown in **Table S3**.

#### ChIP-Seq and superenhancer analyses

Briefly, GSC cells seventy-two hours after knockdown, cells were cross-linked with 1% formaldehyde for 10 min at room temperature. The cells were lysed using SDS Lysis buffer for ChIP (1% SDS, 10 mM EDTA, 50 mM Tris-HCl pH 8). The lysate was then sonicated for 25 cycles at 30% amplitude (15 s ON and 45 s OFF). The sonicated samples were then diluted in ChIP dilution buffer (0.01% SDS, 1% Triton-X-100, 1.2 mM EDTA, 16.7 mM Tris-HCl pH 8, 167 mM NaCl) and used for the immunoprecipitation with H3K27ac (Abcam, Ab4729) beads. After an over-night incubation with antibody, the bound DNA was washed sequentially with low salt wash buffer (0.1% SDS, 1% Triton X 100, 2 mM EDTA, 20 mM Tris-HCl pH 8, 150 mM NaCl), high salt wash buffer (0.1% SDS, 1% Triton X-100, 2 mM EDTA, 20 mM Tris-HCl pH 8, 500 mM NaCl), LiCl wash buffer (0.25 M LiCl, 1% NP40, 1% deoxycholate, 1 mM EDTA, 10 mM Tris-HCl pH 8) and TE wash buffer (10 mM Tris-HCl pH 8, 1 mM EDTA) to remove non-specific sequences and eluted in the elution buffer (84 mg NaHCO<sub>3</sub>, 1 ml 10% SDS, 9 ml H<sub>2</sub>O). Then the samples were reverse cross-linked using NaCl at 65°C overnight. The eluted DNA was purified and used for library preparation.

Library preparation was performed as previously described (54) with minor modifications. Briefly, end repair with NEBNext End Repair enzyme (NEB, E6050) and clean-up with 2.4x volume AMPure XP beads (Beckman Coulter, A63880). A-tailing with Klenow Fragment (3'→5' exo-, NEB, M0212) and purified with 2.4x volume AMPure XP beads. Adapter ligation reactions contained annealed universal adapter and T4 rapid ligase (NEB, B0202) and clean-up with 1.8x volume AMPure XP beads. Chromatin was amplified using KAPA Real-time Library Amplification Kit (KAPABIOSYSTEMS, KK2701) with universal primer and barcoded primer. Amplified chromatin was purified with QIAquick Gel Extraction Kit (Qiagen).

Reads processing and alignment was as follows. Reads were filtered based on quality and adapter sequences were removed from the ChIP-seq experiments using Trim\_galore (<https://github.com/FelixKrueger/TrimGalore>) with the default options. The resulting fastq files were aligned to the human reference genome (hg19) using STAR\_2.5.0a (<https://github.com/alexdobin/STAR>) with the following parameters: “--alignIntronMax 1”, “--outFilterMismatchNoverLmax 0.09”, “--alignMatesGapMax 2000”, “--outFilterMultimapNmax 1”, “--alignEndsType EndToEnd”; the rest of the options were set to the default. Duplicated reads were removed from the bam files using MarkDuplicates software (<http://broadinstitute.github.io/picard/>) A bed file with H3K27ac peaks was generated with *Macs2* using the paired-end narrowPeak mode (q-value < 0.01). Enhancers were identified using the *ROSE* algorithm ([https://bitbucket.org/young\\_computation/rose/src/master/](https://bitbucket.org/young_computation/rose/src/master/)). The H3K27ac bed file was converted to gff format and *ROSE* was run with the stitching distance option of 12.5 Kb and a TSS exclusion zone of 2.5 Kb. Super-enhancers were ranked by counting the H3K27ac signal in the ChIP file compared to the matched input file. The resulting super enhancers were annotated to their closest gene using the *annotatePeaks* from HOMER (<http://homer.ucsd.edu/homer/>).



### Public datasets and statistical analysis

Preprocessed RNA-seq and microarray gene expression and corresponding clinical data for glioma patients from The Cancer Genome Atlas (TCGA) (<https://www.cancer.gov/tcga>), REMBRANDT (55) and Gravendeel et al.(56) glioma patients cohorts have been obtained from GlioVis portal. Gene expression and clinical data for Chinese Glioma Genome Atlas (CGGA) glioma patient cohort was downloaded from (<http://www.cgga.org.cn/download.jsp>, DataSet ID:mRNAseq\_693) (57).

RNA-Seq gene expression data to compare *HLCS* expression between GSC and GBM tumors was obtained from Mack et al (43). For gene and protein expression correlation analyses, reverse phase protein array (RPPA) data from TCGA cohort was accessed through UCSC Xena Browser (<https://xenabrowser.net/datapages/>).

To produce Figure 5E, H3K27ac ChIP-sequencing data from normal brain specimens were accessed through the ENCODE and Roadmap Epigenomics projects as multiple BAM files (58). Downloaded BAM files from 7 different regions of normal human brain have been merged using samtools “merge” command (<http://www.htslib.org/>) into one BAM file. Next, the reads from the merged BAM file have been randomly subsampled using DownsamplingSam function from picard tools (<https://broadinstitute.github.io/picard/>). The reads downsampling was necessary to scale them down to the total number of mapped reads in original ChIP-seq sample generated from TS543 cells (see ChIP-seq and analysis).

Figure 6B was generated using single cell RNA-seq GBM tumor data published in Darmanis et al., 2017 (26). Briefly, only single cell data obtained from tumors, but not from surrounding brain tissue was included in the analysis. We included only single cells with at least 1000 genes expressed higher than 1 count per million and genes expressed in at least 2 cells per tumor sample. R package “Seurat” (59) was used to normalize and visualize data. Two dimensional t-SNE plot was generated using top 30 PCA components and perplexity of 40. We assigned each cell cluster to respective cell identity by marker gene expressions described in Darmanis et al., 2017 (26).

To analyze the associations between known tumor genotypes (molecular subtypes, IDH mutation status etc) and *HLCS* gene expression, we used the publicly available genotype data for each of four GBM patients’ cohorts. For tumor subtype classification, 3-way classification method available from GlioVis portal (60) was implemented. Gene mutation/amplification status information for TCGA GBM patients of interest was obtained from cBIOPORTAL (<https://www.cbioportal.org/>). GBM patients with  $STAT3^{low}$  and  $STAT3^{high}$  TCGA GBM patients were identified using the *STAT3* functionally tuned gene signature (61). The computational module *NearestTemplatePrediction* from GenePattern software (<https://www.genepattern.org/>) was used to identify patient tumors classified with statistical significance (Benjamini-Hochberg FDR p-value < 0.05, 1000 permutation tests) into  $STAT3^{low}$  and  $STAT3^{high}$  subgroups.

In order to estimate whether the expression of gene of interest was significantly associated with cancer patient’s survival, we used the one-dimensional data-driven grouping (1-D DDg) method. Briefly, after sorting the patients by the gene expression values, the values were fitted to survival times and events using the Cox proportional hazards model; goodness-of-fit analysis was applied to maximize the separation between the sorted patients into low- and high-risk subgroups. To

compute the differences between the Kaplan-Meier survival curves, we used the Cox hazards model and Wald test statistic.

In Student's t-test, Man-Whitney exact test were performed using either R3.4.1 or Cytel Studio (version 9.0.0). Significance was defined as  $p < 0.05$ . For multiple testing correction Benjamini-Hochberg statistic was applied to estimate the FDR. SigmaPlot (Version 11.0), a set of R packages (e.g., ggplot2, ggpubr) were implemented for plots generation. For all experiments with error bars, standard error mean was calculated to indicate the variation within each experiment and data, and values represent mean  $\pm$  s.e.m or mean  $\pm$  s.d., as indicated in the figure legends.

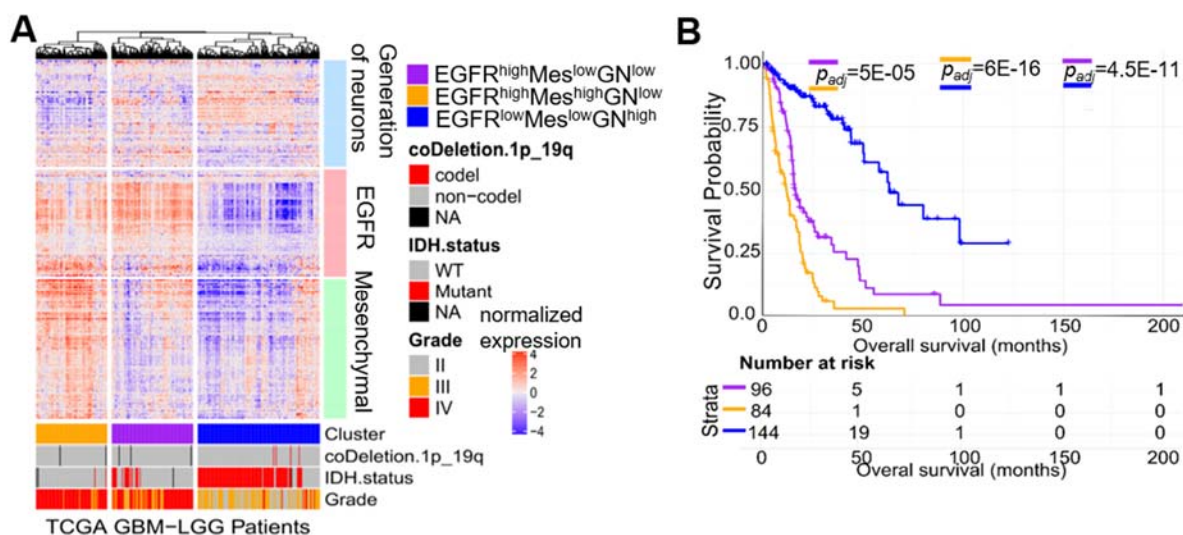

**C**

| drug name           | enrichment score | p-value | established drug targets     | targeted pathway                  |
|---------------------|------------------|---------|------------------------------|-----------------------------------|
| sulconazole         | 0.92             | 4.0E-05 | CYP51A1                      | ergosterol biosynthesis           |
| prestwick-559       | 0.88             | 3.2E-03 | unknown                      | unknown                           |
| 1,4-chrysenequinone | 0.87             | 3.5E-02 | AHR                          | activator of AhR                  |
| MG-262              | 0.87             | 4.6E-03 | unknown                      | proteasome inhibitor              |
| dexpropranolol      | 0.85             | 6.9E-03 | ADRB2, ADRB3                 | beta-adrenergic antagonist        |
| bromperidol         | 0.83             | 1.1E-02 | DRD2                         | dopamine and serotonin antagonist |
| latamoxef           | 0.81             | 1.4E-02 | pbpC, mrcA, mrcB, dacB       | antibiotic and anti-inflammatory  |
| ipratropium bromide | 0.80             | 1.6E-02 | CHRM1, CHRM2, CHRM3          | muscarine receptor antagonist     |
| chrysin             | 0.80             | 1.6E-02 | ABCG2, CDK6, CYP19A1, CYP1B1 | steroidogenesis inhibitor         |
| piperidolate        | 0.80             | 1.6E-02 | CHRM1                        | muscarine receptor antagonist     |

**Fig. S1. Compounds identified in the Connectivity Map Analysis (CMA) using the anti-GSC signature. (A)** Unsupervised clustering of all glioma patients from TCGA dataset using a customized query signature from the EGFR, Mes and GN gene sets. **(B)** Kaplan-Meier analysis of the three clusters from (A). Benjamini-Hochberg adjusted Wald  $p$  values indicate the significance of patients' survival differences between the subgroups. **(C)** Top 10 compounds identified in CMA, along with their known targets and pathways.

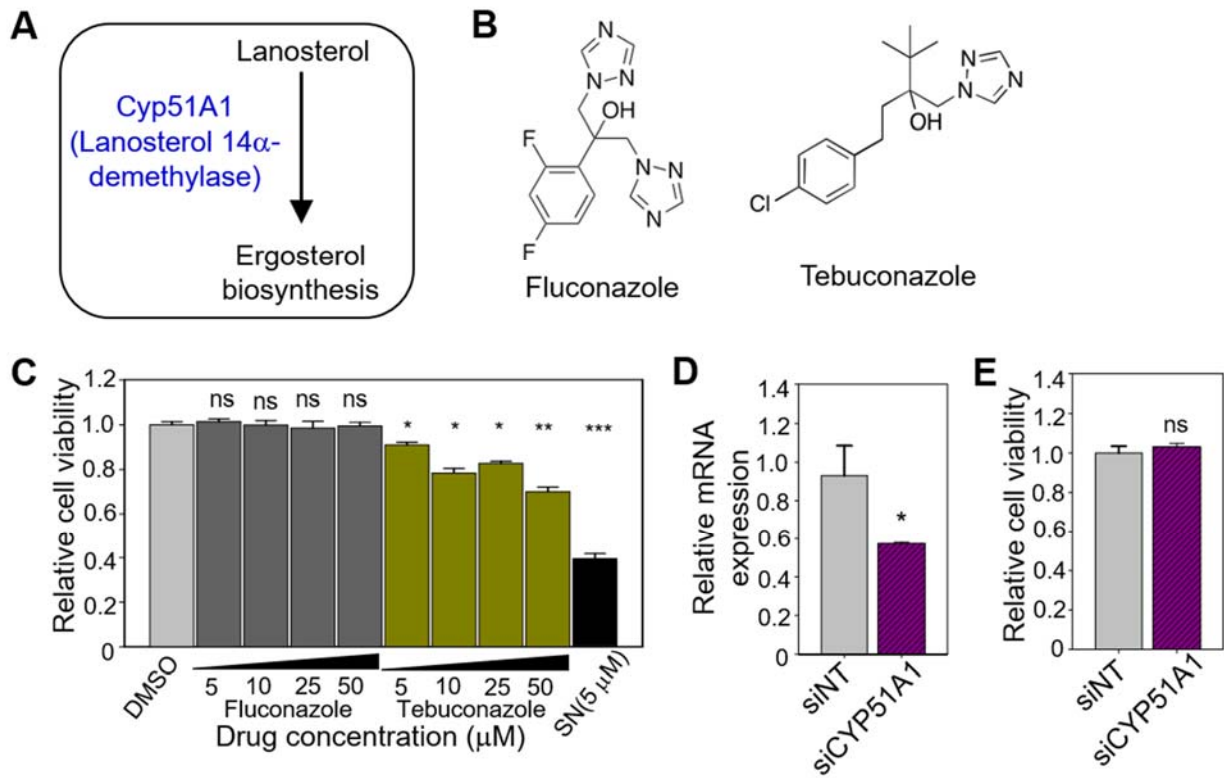

**Fig. S2. SN's effect on GSC is unlikely due to the inhibition of Cyp51A1.** (A) Schematic diagram of the known mechanism of SN action in fungi. (B) Chemical structures of fluconazole and tebuconazole. (C) Cell viability of GSC TS543 after three days of treatment with DMSO, fluconazole, tebuconazole or SN. SN served as a positive control (n=6). \* $P < 1E-05$ ; \*\* $P < 1E-07$ ; \*\*\* $P < 1E-08$ . (D) Validation of Cyp51A1 KD by qRT-PCR analysis (n=4) (mean  $\pm$  SD). *HSP70* and *TBP* serve as the housekeeping genes. \* $P < 0.05$ . (E) Cell viability assay of GSCs and mouse astrocytes with SN treatment (n=6) (mean  $\pm$  SD). Two-sided unpaired Student's *t*-test.

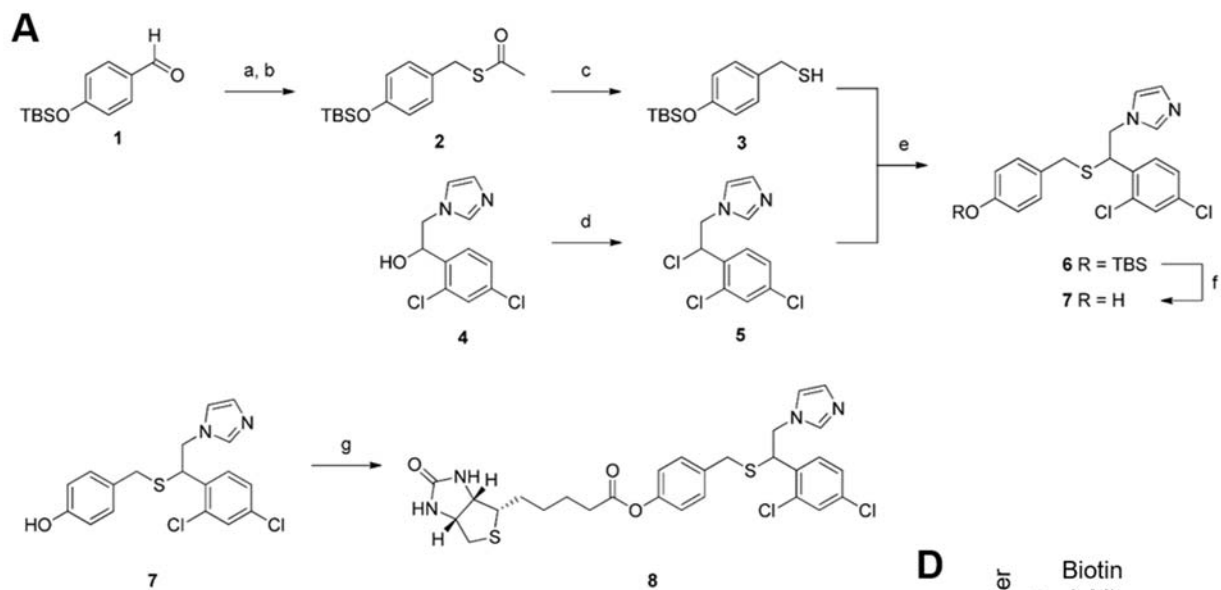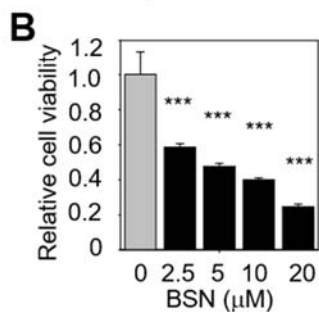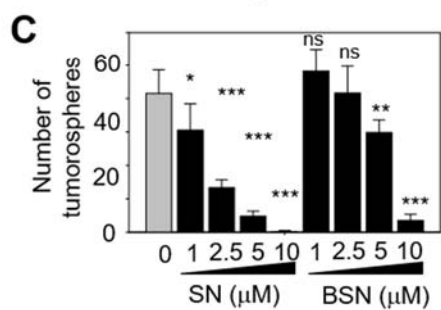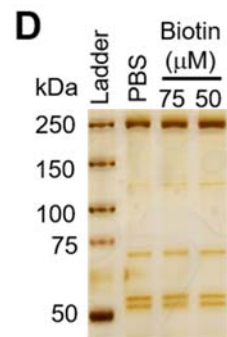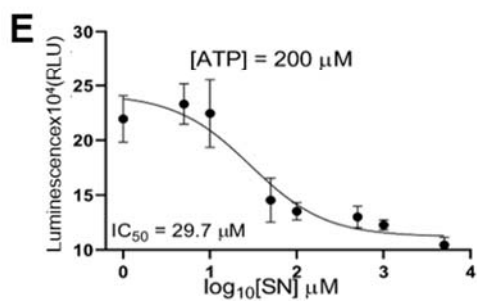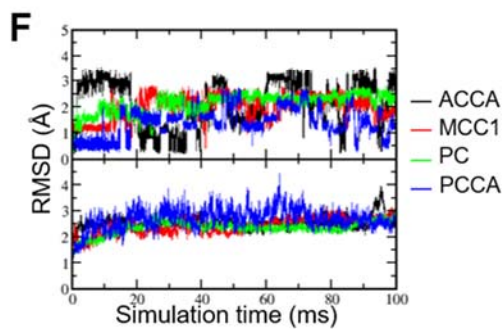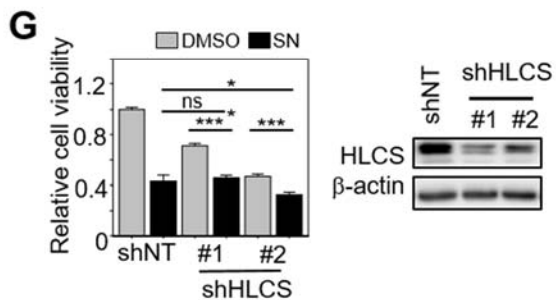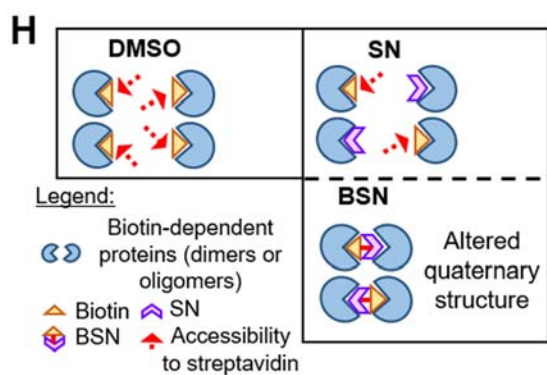

**Fig. S3. SN inhibits biotinylation of carboxylases by competing with biotin for the BC components of these enzymes. (A)** Chemical synthesis of biotin-sulconazole (BSN). **(B)** Cell viability assay of GSC TS543 upon BSN treatment (n=6). **(C)** Tumorsphere formation of GSCs following DMSO, BSN or SN treatment (5 days) (n=6) (mean  $\pm$  SD). **(D)** Silver stained SDS-PAGE gel of streptavidin pulldown lysates of 293T cells with or without 6 hr biotin treatment. **(E)** Enzymatic activity of recombinant ACC1 protein in the presence of SN, with 200  $\mu$ M of ATP (n=5). **(F)** Root mean square deviation (RMSD) of SN (top) and protein conformations of ACCA, MCC1, PC, PCCA bound with SN (bottom) sampled during standard MD simulations. **(G)** Cell viability assay of shNT or shHLCS transduced GSC TS543, with or without 5  $\mu$ M SN treatment (3 days) (n=6) (mean  $\pm$  SD) (left). Western blot analysis of HLCS from shNT or shHLCS transduced cells (right).  $\beta$ -actin serves as the loading control. **(H)** Proposed model for the binding of SN and BSN to biotin-dependent carboxylases. **(B)**, **(C)** and **(G)**: two-sided unpaired Student's *t*-test, \* $P < 0.05$ , \*\* $P < 0.01$ , \*\*\* $P < 0.001$ .

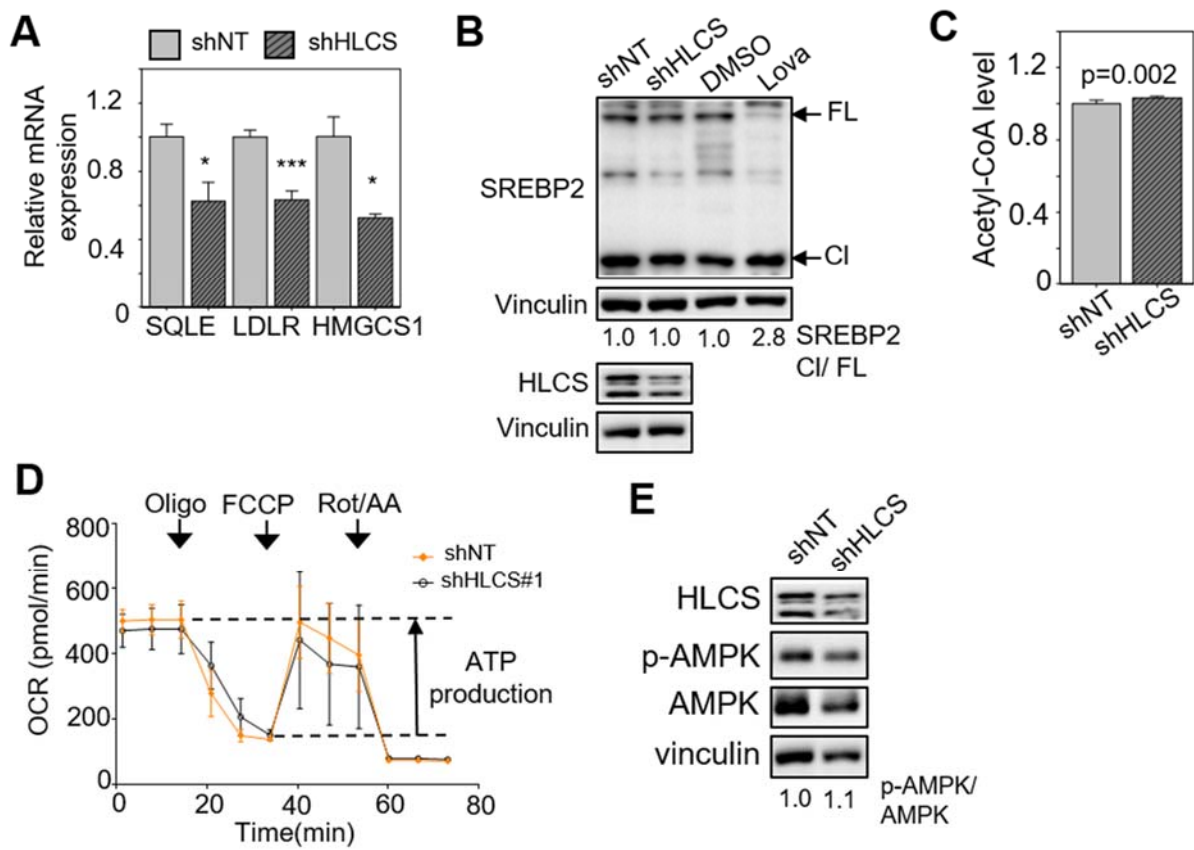

**Fig. S4. *HLCS* KD does not lead to cholesterol depletion and OXPHOS impairment in 293T cells under biotin-free culturing conditions.** (A) qRT-PCR analysis of representative genes in the cholesterol homeostasis pathway in *HLCS* KD 293T cells (n=4) (mean  $\pm$  SD). *HSP70* and *TBP* serve as the housekeeping genes. Two-sided unpaired Student's *t*-test, \**P* < 0.05, \*\*\**P* < 0.001. (B) Western blot analysis of full length (FL) and cleaved (Cl) SREBP2 protein after *HLCS* KD of 293T cells. Vinculin serves as the loading control. SREBP2 Cl/FL ratios are indicated. (C) Relative intracellular levels of acetyl-CoA in 293T with or without *HLCS* KD (n=8) (mean  $\pm$  SD). (D) Seahorse analysis of 293T cells with or without *HLCS* KD (n=10). (E) Western blot analysis of p-AMPK and AMPK levels in *HLCS* KD 293T cells. *HLCS* and vinculin serve as the positive and loading control, respectively. p-AMPK/AMPK ratios are indicated.

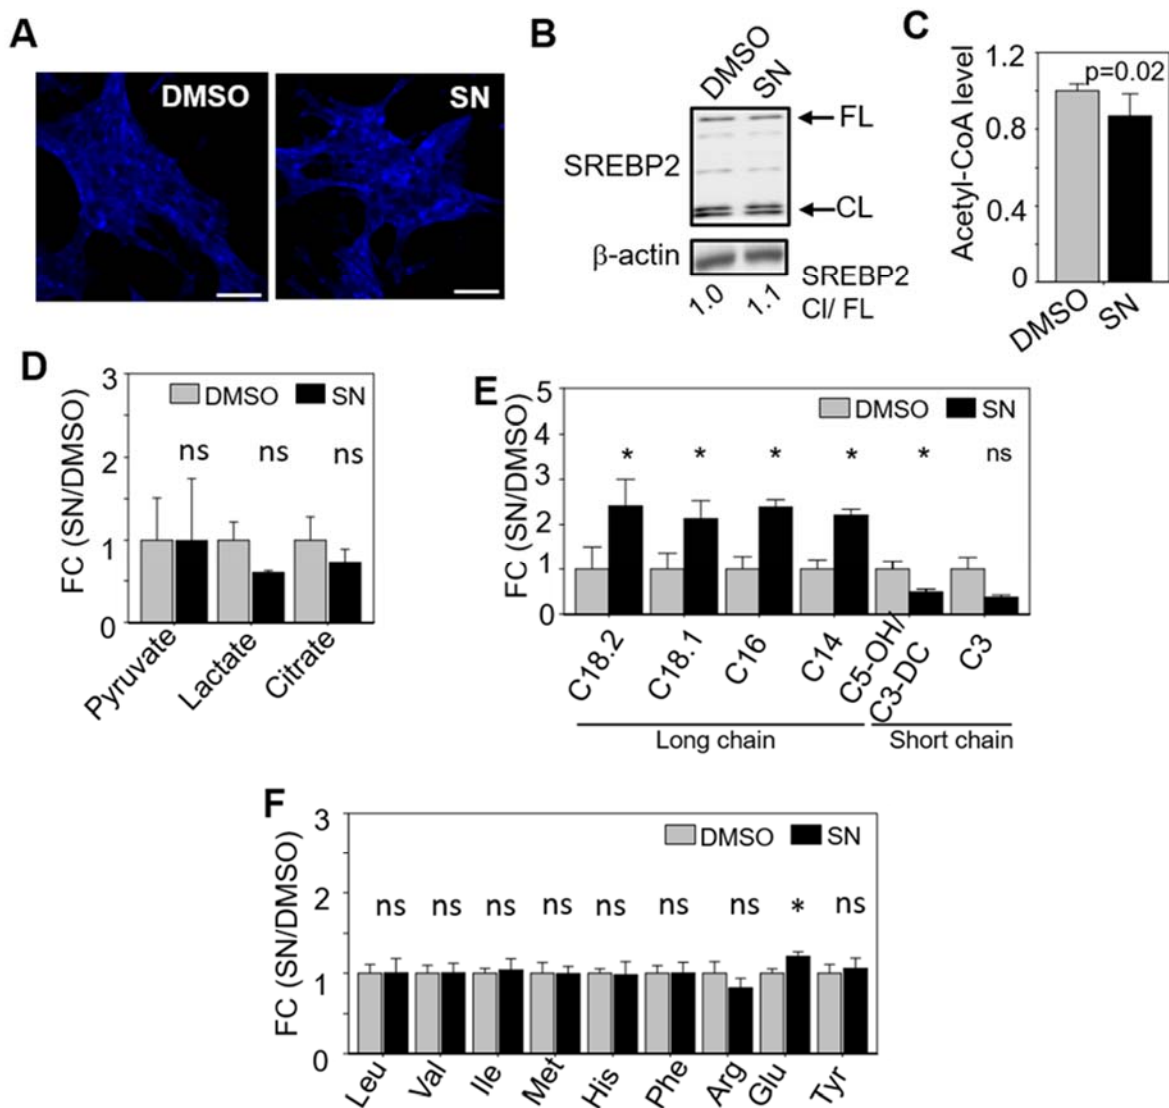

**Fig. S5. Metabolite changes associated with SN treatment of mouse astrocytes.** (A) Representative images of SN- or DMSO-treated mouse astrocytes that were stained with Filipin. (B) Western blot analysis of SREBP2 in SN- or DMSO-treated mouse astrocytes.  $\beta$ -actin serves as the loading control. SREBP2 C1/FL ratio are indicated. (C-F) Relative intracellular levels of acetyl-CoA (C), organic acids (D), acylcarnitines (E) and amino acids (F) in mouse astrocytes with and without 5  $\mu$ M SN treatment (3 days) ( $n=3$ ). Two-sided unpaired Student's t-test,  $*P < 0.05$ .



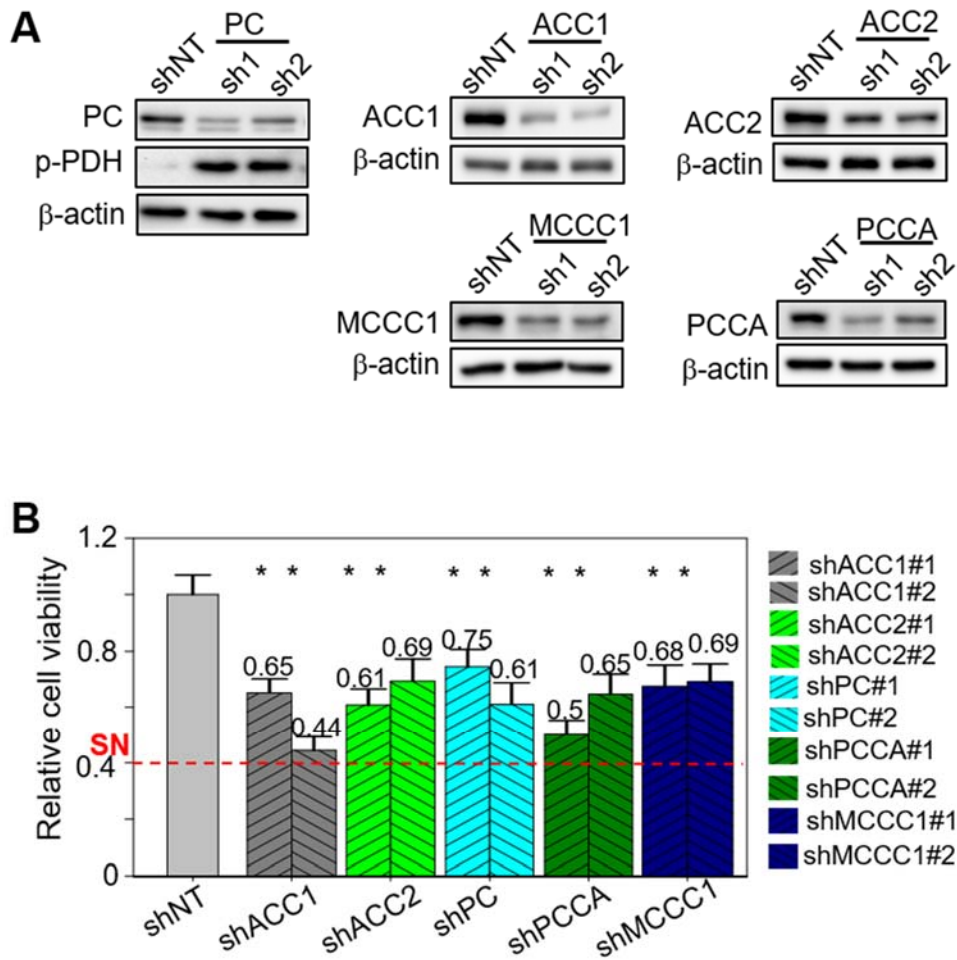

**Fig. S6. SN likely inhibits multiple biotin-dependent carboxylases in GSC. (A)** Western blot analysis of individual biotin-dependent carboxylases expression upon their KD.  $\beta$ -actin serves as the loading control. **(B)** Relative cell viability of GSC upon enzyme KD from (A) (n=6). Two-sided unpaired Student's t-test,  $*P < 1E-05$ .

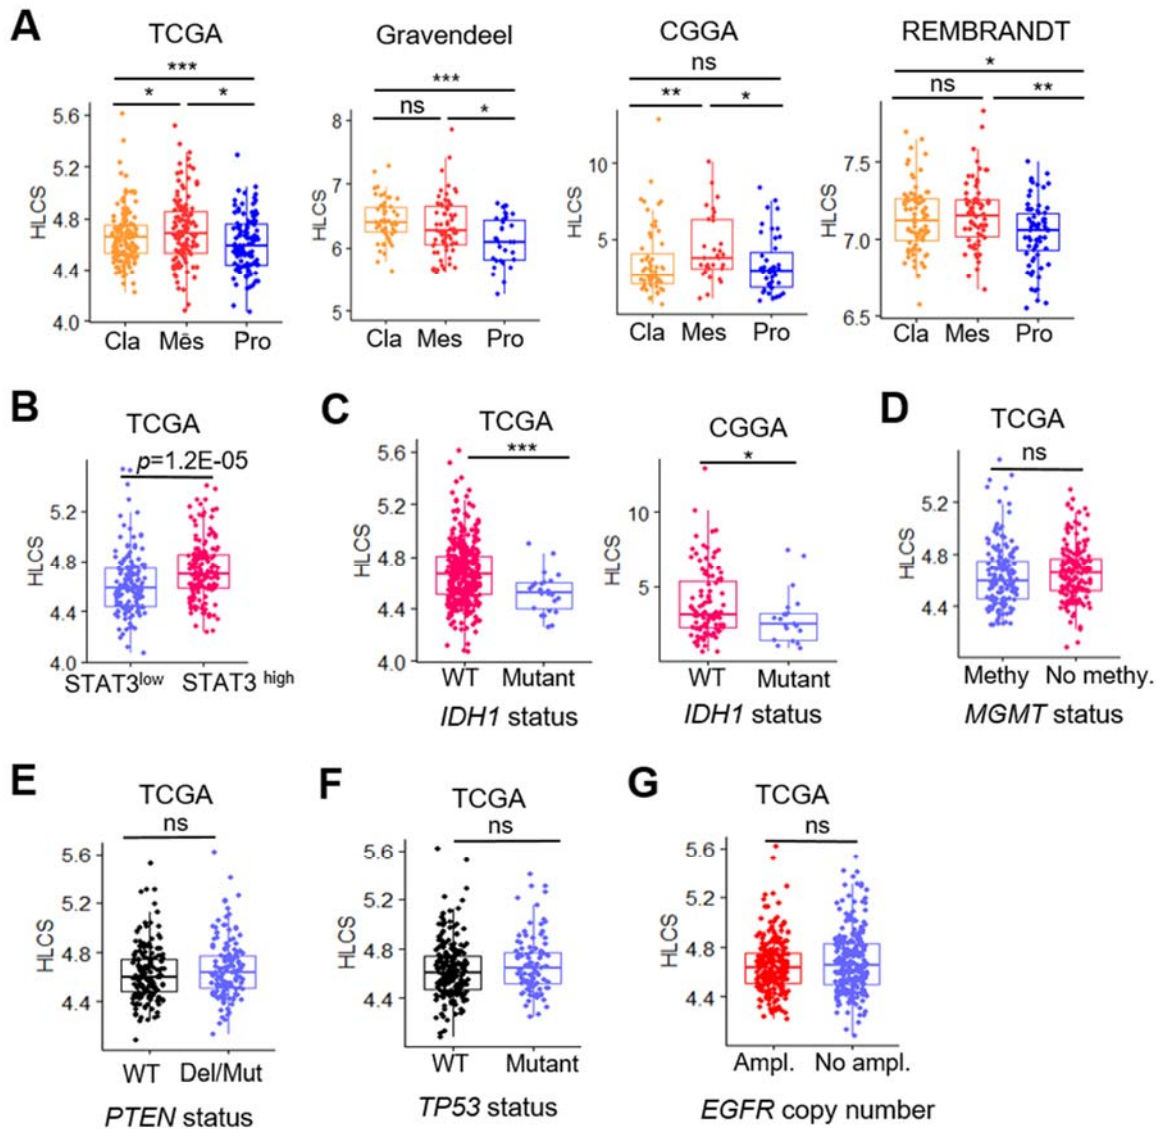

**Fig S7. Correlative analyses of *HLCS* levels with various established GBM markers.** (A) Correlative analysis of *HLCS* levels with GBM subtypes in multiple GBM patient cohorts. *Cla*, Classical; *Mes*, Mesenchymal; *Pro*, Proneural. (B) Correlative analysis of *HLCS* levels with GBM of STAT3-low versus -high gene signatures in the TCGA dataset. (C) Correlative analysis of *HLCS* levels with *IDH1* wildtype (WT) versus mutant GBM in multiple GBM cohorts. (D) Correlative analysis of *HLCS* levels with *MGMT* promoter methylated (Methy) versus non-methylated GBM in the TCGA dataset. (E-G) Correlative analysis of *HLCS* levels with GBM having alterations in *PTEN* (E) and *TP53* (F) gene status, as well as *EGFR* copy number (G) in the TCGA dataset. \* $P < 0.05$ , \*\* $P < 0.01$ , \*\*\* $P < 0.001$ , Mann-Whitney exact test.

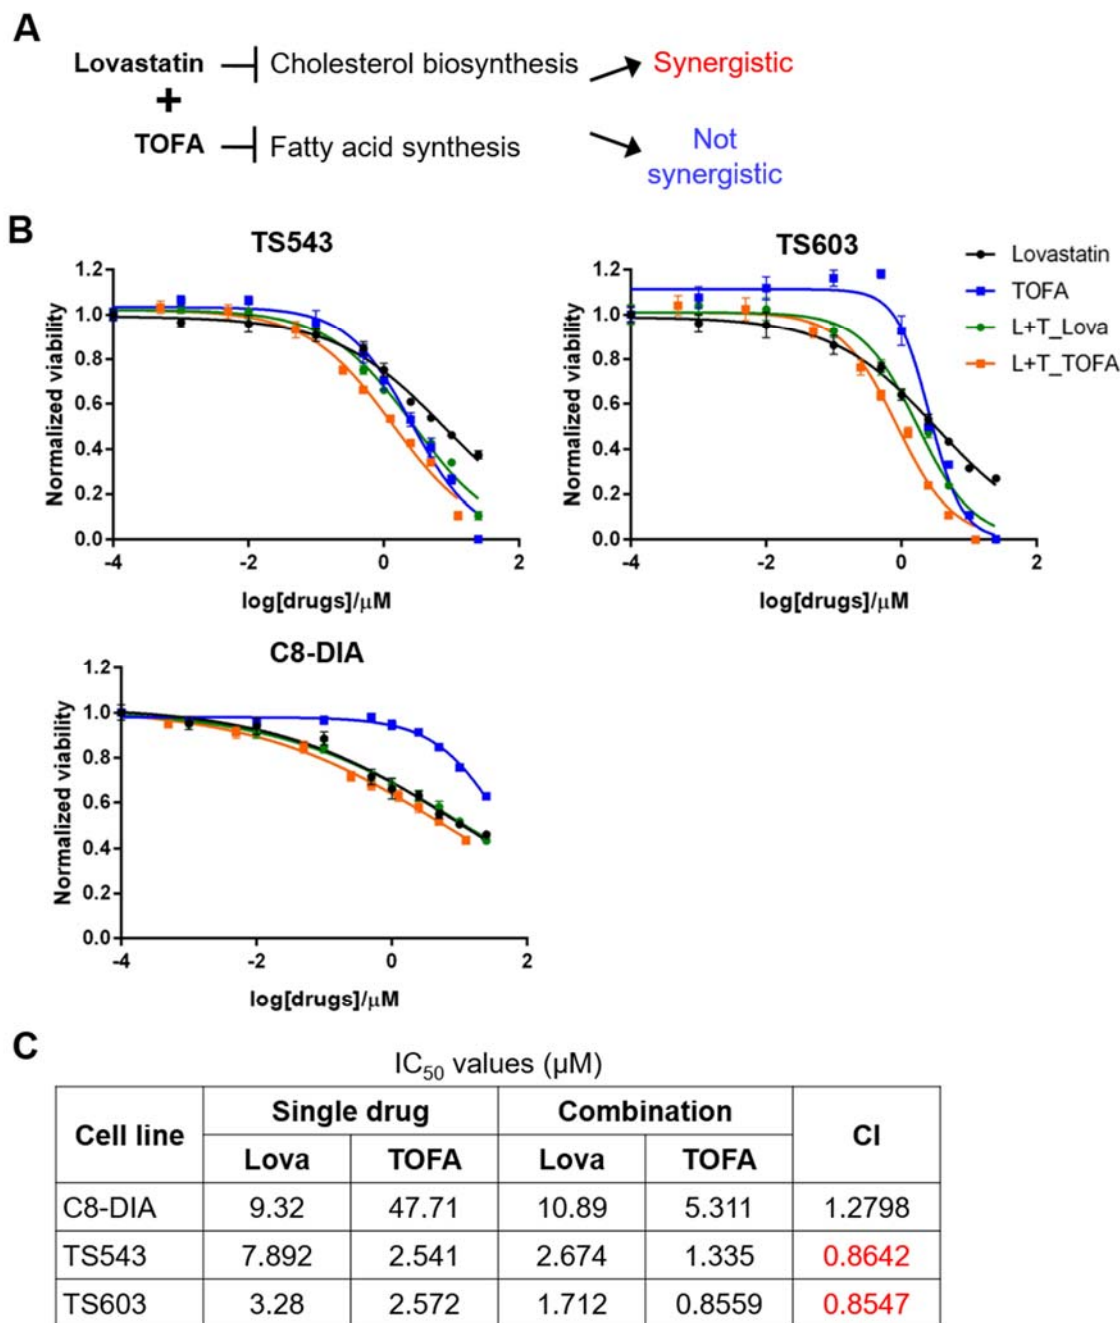

**Fig. S8. Combined inhibition of the fatty acid and cholesterol synthesis pathways synergistically reduce cell viability of GSCs but not mouse astrocytes.** (A) Diagram showing the use of TOFA and lovastatin to inhibit the fatty acid and cholesterol synthesis pathways, respectively. (B) Cell viability of GSCs and astrocytes after 3 days of drug treatment (n=6). (C) Table showing the IC<sub>50</sub> values of single or combination drug treatments of the GSCs and astrocytes. A combination index (CI) of less than one indicates drug synergy.

**Table S1. GSEA gene sets and the corresponding genes, along with the Affymetrix probe sets, used for Connectivity Map Analysis.**

| <b>GSEA gene sets</b>            | <b>Gene symbol</b> | <b>AffyProbe Set ID</b> |
|----------------------------------|--------------------|-------------------------|
| KOBAYASHI EGFR SIGNALING 24HR DN | ODC1               | 200790 at               |
| KOBAYASHI EGFR SIGNALING 24HR DN | PAICS              | 201013 s at             |
| KOBAYASHI EGFR SIGNALING 24HR DN | PAICS              | 201014 s at             |
| KOBAYASHI EGFR SIGNALING 24HR DN | TUBA1B             | 201090 x at             |
| KOBAYASHI EGFR SIGNALING 24HR DN | ENO2               | 201313 at               |
| KOBAYASHI EGFR SIGNALING 24HR DN | CCND3              | 201700 at               |
| KOBAYASHI EGFR SIGNALING 24HR DN | TUBG1              | 201714 at               |
| KOBAYASHI EGFR SIGNALING 24HR DN | SLC29A1            | 201801 s at             |
| KOBAYASHI EGFR SIGNALING 24HR DN | SLC29A1            | 201802 at               |
| KOBAYASHI EGFR SIGNALING 24HR DN | RRM2               | 201890 at               |
| KOBAYASHI EGFR SIGNALING 24HR DN | PSRC1              | 201896 s at             |
| KOBAYASHI EGFR SIGNALING 24HR DN | CKS1B              | 201897 s at             |
| KOBAYASHI EGFR SIGNALING 24HR DN | BIRC5              | 202094 at               |
| KOBAYASHI EGFR SIGNALING 24HR DN | BIRC5              | 202095 s at             |
| KOBAYASHI EGFR SIGNALING 24HR DN | PLK1               | 202240 at               |
| KOBAYASHI EGFR SIGNALING 24HR DN | UNG                | 202330 s at             |
| KOBAYASHI EGFR SIGNALING 24HR DN | TK1                | 202338 at               |
| KOBAYASHI EGFR SIGNALING 24HR DN | FABP5              | 202345 s at             |
| KOBAYASHI EGFR SIGNALING 24HR DN | TYMS               | 202589 at               |
| KOBAYASHI EGFR SIGNALING 24HR DN | AXL                | 202685 s at             |
| KOBAYASHI EGFR SIGNALING 24HR DN | AXL                | 202686 s at             |
| KOBAYASHI EGFR SIGNALING 24HR DN | UBE2S              | 202779 s at             |
| KOBAYASHI EGFR SIGNALING 24HR DN | CDC20              | 202870 s at             |
| KOBAYASHI EGFR SIGNALING 24HR DN | RNASEH2A           | 203022 at               |
| KOBAYASHI EGFR SIGNALING 24HR DN | SPAG5              | 203145 at               |
| KOBAYASHI EGFR SIGNALING 24HR DN | UPP1               | 203234 at               |
| KOBAYASHI EGFR SIGNALING 24HR DN | MAD2L1             | 203362 s at             |
| KOBAYASHI EGFR SIGNALING 24HR DN | BUB1B              | 203755 at               |
| KOBAYASHI EGFR SIGNALING 24HR DN | DLGAP5             | 203764 at               |
| KOBAYASHI EGFR SIGNALING 24HR DN | VRK1               | 203856 at               |
| KOBAYASHI EGFR SIGNALING 24HR DN | NT5E               | 203939 at               |
| KOBAYASHI EGFR SIGNALING 24HR DN | AURKA              | 204092 s at             |
| KOBAYASHI EGFR SIGNALING 24HR DN | CKS2               | 204170 s at             |
| KOBAYASHI EGFR SIGNALING 24HR DN | CDK2               | 204252 at               |
| KOBAYASHI EGFR SIGNALING 24HR DN | FOSL1              | 204420 at               |
| KOBAYASHI EGFR SIGNALING 24HR DN | CDC25A             | 204695 at               |
| KOBAYASHI EGFR SIGNALING 24HR DN | CDC25A             | 204696 s at             |
| KOBAYASHI EGFR SIGNALING 24HR DN | PARP2              | 204752 x at             |
| KOBAYASHI EGFR SIGNALING 24HR DN | MELK               | 204825 at               |
| KOBAYASHI EGFR SIGNALING 24HR DN | MAFF               | 205193 at               |

|                                  |         |             |
|----------------------------------|---------|-------------|
| KOBAYASHI EGFR SIGNALING 24HR DN | GPSM2   | 205240 at   |
| KOBAYASHI EGFR SIGNALING 24HR DN | ACOX2   | 205364 at   |
| KOBAYASHI EGFR SIGNALING 24HR DN | OASL    | 205660 at   |
| KOBAYASHI EGFR SIGNALING 24HR DN | ADORA2B | 205891 at   |
| KOBAYASHI EGFR SIGNALING 24HR DN | POLE2   | 205909 at   |
| KOBAYASHI EGFR SIGNALING 24HR DN | PSMC3IP | 205956 x at |
| KOBAYASHI EGFR SIGNALING 24HR DN | SNRPA1  | 206055 s at |
| KOBAYASHI EGFR SIGNALING 24HR DN | NRG1    | 206237 s at |
| KOBAYASHI EGFR SIGNALING 24HR DN | NRG1    | 206343 s at |
| KOBAYASHI EGFR SIGNALING 24HR DN | KIF14   | 206364 at   |
| KOBAYASHI EGFR SIGNALING 24HR DN | IL11    | 206924 at   |
| KOBAYASHI EGFR SIGNALING 24HR DN | IL11    | 206926 s at |
| KOBAYASHI EGFR SIGNALING 24HR DN | HAUS7   | 207891 s at |
| KOBAYASHI EGFR SIGNALING 24HR DN | AURKA   | 208079 s at |
| KOBAYASHI EGFR SIGNALING 24HR DN | AURKA   | 208080 at   |
| KOBAYASHI EGFR SIGNALING 24HR DN | NRG1    | 208230 s at |
| KOBAYASHI EGFR SIGNALING 24HR DN | NRG1    | 208231 at   |
| KOBAYASHI EGFR SIGNALING 24HR DN | NRG1    | 208232 x at |
| KOBAYASHI EGFR SIGNALING 24HR DN | NRG1    | 208241 at   |
| KOBAYASHI EGFR SIGNALING 24HR DN | HMGB2   | 208808 s at |
| KOBAYASHI EGFR SIGNALING 24HR DN | TUBB4B  | 208977 x at |
| KOBAYASHI EGFR SIGNALING 24HR DN | TUBB6   | 209191 at   |
| KOBAYASHI EGFR SIGNALING 24HR DN | TFPI2   | 209277 at   |
| KOBAYASHI EGFR SIGNALING 24HR DN | TFPI2   | 209278 s at |
| KOBAYASHI EGFR SIGNALING 24HR DN | KIF2C   | 209408 at   |
| KOBAYASHI EGFR SIGNALING 24HR DN | AURKB   | 209464 at   |
| KOBAYASHI EGFR SIGNALING 24HR DN | BUB1    | 209642 at   |
| KOBAYASHI EGFR SIGNALING 24HR DN | RRM2    | 209773 s at |
| KOBAYASHI EGFR SIGNALING 24HR DN | PHLDA2  | 209802 at   |
| KOBAYASHI EGFR SIGNALING 24HR DN | PHLDA2  | 209803 s at |
| KOBAYASHI EGFR SIGNALING 24HR DN | UCK2    | 209825 s at |
| KOBAYASHI EGFR SIGNALING 24HR DN | TPX2    | 210052 s at |
| KOBAYASHI EGFR SIGNALING 24HR DN | BIRC5   | 210334 x at |
| KOBAYASHI EGFR SIGNALING 24HR DN | OASL    | 210797 s at |
| KOBAYASHI EGFR SIGNALING 24HR DN | TUBA1B  | 211058 x at |
| KOBAYASHI EGFR SIGNALING 24HR DN | TUBA1B  | 211072 x at |
| KOBAYASHI EGFR SIGNALING 24HR DN | KIF2C   | 211519 s at |
| KOBAYASHI EGFR SIGNALING 24HR DN | CDK2    | 211803 at   |
| KOBAYASHI EGFR SIGNALING 24HR DN | CDK2    | 211804 s at |
| KOBAYASHI EGFR SIGNALING 24HR DN | MKI67   | 212020 s at |
| KOBAYASHI EGFR SIGNALING 24HR DN | MKI67   | 212021 s at |
| KOBAYASHI EGFR SIGNALING 24HR DN | MKI67   | 212022 s at |
| KOBAYASHI EGFR SIGNALING 24HR DN | MKI67   | 212023 s at |

|                                  |           |             |
|----------------------------------|-----------|-------------|
| KOBAYASHI EGFR SIGNALING 24HR DN | MCM4      | 212141 at   |
| KOBAYASHI EGFR SIGNALING 24HR DN | MCM4      | 212142 at   |
| KOBAYASHI EGFR SIGNALING 24HR DN | TUBA1B    | 212639 x at |
| KOBAYASHI EGFR SIGNALING 24HR DN | NCAPH     | 212949 at   |
| KOBAYASHI EGFR SIGNALING 24HR DN | HAUS7     | 213334 x at |
| KOBAYASHI EGFR SIGNALING 24HR DN | TMEM158   | 213338 at   |
| KOBAYASHI EGFR SIGNALING 24HR DN | G0S2      | 213524 s at |
| KOBAYASHI EGFR SIGNALING 24HR DN | TUBA1B    | 213646 x at |
| KOBAYASHI EGFR SIGNALING 24HR DN | TUBB4B    | 213726 x at |
| KOBAYASHI EGFR SIGNALING 24HR DN | PSMC3IP   | 213951 s at |
| KOBAYASHI EGFR SIGNALING 24HR DN | PARP2     | 214086 s at |
| KOBAYASHI EGFR SIGNALING 24HR DN | ELL2      | 214445 at   |
| KOBAYASHI EGFR SIGNALING 24HR DN | ELL2      | 214446 at   |
| KOBAYASHI EGFR SIGNALING 24HR DN | PAICS     | 214664 at   |
| KOBAYASHI EGFR SIGNALING 24HR DN | BUB1      | 215508 at   |
| KOBAYASHI EGFR SIGNALING 24HR DN | BUB1      | 215509 s at |
| KOBAYASHI EGFR SIGNALING 24HR DN | SNRPA1    | 215722 s at |
| KOBAYASHI EGFR SIGNALING 24HR DN | PARP2     | 215773 x at |
| KOBAYASHI EGFR SIGNALING 24HR DN | BUB1      | 216275 at   |
| KOBAYASHI EGFR SIGNALING 24HR DN | BUB1      | 216277 at   |
| KOBAYASHI EGFR SIGNALING 24HR DN | DSCC1     | 216646 at   |
| KOBAYASHI EGFR SIGNALING 24HR DN | SNRPA1    | 216977 x at |
| KOBAYASHI EGFR SIGNALING 24HR DN | TYMS      | 217684 at   |
| KOBAYASHI EGFR SIGNALING 24HR DN | PHLDA1    | 217996 at   |
| KOBAYASHI EGFR SIGNALING 24HR DN | PHLDA1    | 217997 at   |
| KOBAYASHI EGFR SIGNALING 24HR DN | PHLDA1    | 217998 at   |
| KOBAYASHI EGFR SIGNALING 24HR DN | PHLDA1    | 217999 s at |
| KOBAYASHI EGFR SIGNALING 24HR DN | PHLDA1    | 218000 s at |
| KOBAYASHI EGFR SIGNALING 24HR DN | PRC1      | 218009 s at |
| KOBAYASHI EGFR SIGNALING 24HR DN | TNFRSF12A | 218368 s at |
| KOBAYASHI EGFR SIGNALING 24HR DN | CEP55     | 218542 at   |
| KOBAYASHI EGFR SIGNALING 24HR DN | HJURP     | 218726 at   |
| KOBAYASHI EGFR SIGNALING 24HR DN | CENPM     | 218741 at   |
| KOBAYASHI EGFR SIGNALING 24HR DN | POLR3K    | 218866 s at |
| KOBAYASHI EGFR SIGNALING 24HR DN | DSCC1     | 219000 s at |
| KOBAYASHI EGFR SIGNALING 24HR DN | PBK       | 219148 at   |
| KOBAYASHI EGFR SIGNALING 24HR DN | NUDT15    | 219347 at   |
| KOBAYASHI EGFR SIGNALING 24HR DN | DSN1      | 219512 at   |
| KOBAYASHI EGFR SIGNALING 24HR DN | ECT2      | 219787 s at |
| KOBAYASHI EGFR SIGNALING 24HR DN | E2F8      | 219990 at   |
| KOBAYASHI EGFR SIGNALING 24HR DN | HELLS     | 220085 at   |
| KOBAYASHI EGFR SIGNALING 24HR DN | DEPDC1    | 220295 x at |
| KOBAYASHI EGFR SIGNALING 24HR DN | CDCA3     | 221436 s at |

|                                  |          |             |
|----------------------------------|----------|-------------|
| KOBAYASHI EGFR SIGNALING 24HR DN | DONSON   | 221677 s at |
| KOBAYASHI EGFR SIGNALING 24HR DN | GPSM2    | 221922 at   |
| KOBAYASHI EGFR SIGNALING 24HR DN | MCM4     | 222036 s at |
| KOBAYASHI EGFR SIGNALING 24HR DN | MCM4     | 222037 at   |
| KOBAYASHI EGFR SIGNALING 24HR DN | KIF18B   | 222039 at   |
| KOBAYASHI EGFR SIGNALING 24HR DN | MAFF     | 36711 at    |
| VERHAAK GLIOBLASTOMA MESENCHYMAL | S100A11  | 200660 at   |
| VERHAAK GLIOBLASTOMA MESENCHYMAL | NPC2     | 200701 at   |
| VERHAAK GLIOBLASTOMA MESENCHYMAL | IQGAP1   | 200791 s at |
| VERHAAK GLIOBLASTOMA MESENCHYMAL | ANXA1    | 201012 at   |
| VERHAAK GLIOBLASTOMA MESENCHYMAL | SYNGR2   | 201079 at   |
| VERHAAK GLIOBLASTOMA MESENCHYMAL | PLS3     | 201215 at   |
| VERHAAK GLIOBLASTOMA MESENCHYMAL | ANXA4    | 201301 s at |
| VERHAAK GLIOBLASTOMA MESENCHYMAL | ANXA4    | 201302 at   |
| VERHAAK GLIOBLASTOMA MESENCHYMAL | SHC1     | 201469 s at |
| VERHAAK GLIOBLASTOMA MESENCHYMAL | ANXA2    | 201590 x at |
| VERHAAK GLIOBLASTOMA MESENCHYMAL | CNN2     | 201605 x at |
| VERHAAK GLIOBLASTOMA MESENCHYMAL | TIMP1    | 201666 at   |
| VERHAAK GLIOBLASTOMA MESENCHYMAL | LAPTM5   | 201720 s at |
| VERHAAK GLIOBLASTOMA MESENCHYMAL | LAPTM5   | 201721 s at |
| VERHAAK GLIOBLASTOMA MESENCHYMAL | MYOF     | 201798 s at |
| VERHAAK GLIOBLASTOMA MESENCHYMAL | LRRFIP1  | 201861 s at |
| VERHAAK GLIOBLASTOMA MESENCHYMAL | LRRFIP1  | 201862 s at |
| VERHAAK GLIOBLASTOMA MESENCHYMAL | HEXB     | 201944 at   |
| VERHAAK GLIOBLASTOMA MESENCHYMAL | ARPC1B   | 201954 at   |
| VERHAAK GLIOBLASTOMA MESENCHYMAL | ACSL1    | 201963 at   |
| VERHAAK GLIOBLASTOMA MESENCHYMAL | WWTR1    | 202132 at   |
| VERHAAK GLIOBLASTOMA MESENCHYMAL | WWTR1    | 202133 at   |
| VERHAAK GLIOBLASTOMA MESENCHYMAL | WWTR1    | 202134 s at |
| VERHAAK GLIOBLASTOMA MESENCHYMAL | MVP      | 202180 s at |
| VERHAAK GLIOBLASTOMA MESENCHYMAL | BLVRB    | 202201 at   |
| VERHAAK GLIOBLASTOMA MESENCHYMAL | SEC24D   | 202375 at   |
| VERHAAK GLIOBLASTOMA MESENCHYMAL | SERPINE1 | 202627 s at |
| VERHAAK GLIOBLASTOMA MESENCHYMAL | SERPINE1 | 202628 s at |
| VERHAAK GLIOBLASTOMA MESENCHYMAL | WIPF1    | 202663 at   |
| VERHAAK GLIOBLASTOMA MESENCHYMAL | WIPF1    | 202664 at   |
| VERHAAK GLIOBLASTOMA MESENCHYMAL | WIPF1    | 202665 s at |
| VERHAAK GLIOBLASTOMA MESENCHYMAL | P4HA2    | 202733 at   |
| VERHAAK GLIOBLASTOMA MESENCHYMAL | SLC16A3  | 202855 s at |
| VERHAAK GLIOBLASTOMA MESENCHYMAL | SLC16A3  | 202856 s at |
| VERHAAK GLIOBLASTOMA MESENCHYMAL | IL1R1    | 202948 at   |
| VERHAAK GLIOBLASTOMA MESENCHYMAL | FHL2     | 202949 s at |
| VERHAAK GLIOBLASTOMA MESENCHYMAL | PYGL     | 202990 at   |

|                                  |          |             |
|----------------------------------|----------|-------------|
| VERHAAK_GLIOBLASTOMA_MESENCHYMAL | S100A4   | 203186 s at |
| VERHAAK_GLIOBLASTOMA_MESENCHYMAL | IL4R     | 203233 at   |
| VERHAAK_GLIOBLASTOMA_MESENCHYMAL | SH2B3    | 203320 at   |
| VERHAAK_GLIOBLASTOMA_MESENCHYMAL | SAT1     | 203455 s at |
| VERHAAK_GLIOBLASTOMA_MESENCHYMAL | ELF4     | 203490 at   |
| VERHAAK_GLIOBLASTOMA_MESENCHYMAL | TNFRSF1B | 203508 at   |
| VERHAAK_GLIOBLASTOMA_MESENCHYMAL | CD4      | 203547 at   |
| VERHAAK_GLIOBLASTOMA_MESENCHYMAL | FCGR2A   | 203561 at   |
| VERHAAK_GLIOBLASTOMA_MESENCHYMAL | PROCR    | 203650 at   |
| VERHAAK_GLIOBLASTOMA_MESENCHYMAL | EMP3     | 203729 at   |
| VERHAAK_GLIOBLASTOMA_MESENCHYMAL | TGOLN2   | 203833 s at |
| VERHAAK_GLIOBLASTOMA_MESENCHYMAL | TGOLN2   | 203834 s at |
| VERHAAK_GLIOBLASTOMA_MESENCHYMAL | ARHGAP29 | 203910 at   |
| VERHAAK_GLIOBLASTOMA_MESENCHYMAL | STAB1    | 204150 at   |
| VERHAAK_GLIOBLASTOMA_MESENCHYMAL | PLA2G15  | 204458 at   |
| VERHAAK_GLIOBLASTOMA_MESENCHYMAL | DSC2     | 204750 s at |
| VERHAAK_GLIOBLASTOMA_MESENCHYMAL | DSC2     | 204751 x at |
| VERHAAK_GLIOBLASTOMA_MESENCHYMAL | TYMP     | 204858 s at |
| VERHAAK_GLIOBLASTOMA_MESENCHYMAL | PDPN     | 204879 at   |
| VERHAAK_GLIOBLASTOMA_MESENCHYMAL | VAMP5    | 204929 s at |
| VERHAAK_GLIOBLASTOMA_MESENCHYMAL | PLK3     | 204958 at   |
| VERHAAK_GLIOBLASTOMA_MESENCHYMAL | MAN2A1   | 205105 at   |
| VERHAAK_GLIOBLASTOMA_MESENCHYMAL | NCF4     | 205147 x at |
| VERHAAK_GLIOBLASTOMA_MESENCHYMAL | RELB     | 205205 at   |
| VERHAAK_GLIOBLASTOMA_MESENCHYMAL | EHD2     | 205341 at   |
| VERHAAK_GLIOBLASTOMA_MESENCHYMAL | GNA15    | 205349 at   |
| VERHAAK_GLIOBLASTOMA_MESENCHYMAL | FES      | 205418 at   |
| VERHAAK_GLIOBLASTOMA_MESENCHYMAL | PLAU     | 205479 s at |
| VERHAAK_GLIOBLASTOMA_MESENCHYMAL | SRPX2    | 205499 at   |
| VERHAAK_GLIOBLASTOMA_MESENCHYMAL | GCNT1    | 205505 at   |
| VERHAAK_GLIOBLASTOMA_MESENCHYMAL | TRPM2    | 205708 s at |
| VERHAAK_GLIOBLASTOMA_MESENCHYMAL | ITGAM    | 205786 s at |
| VERHAAK_GLIOBLASTOMA_MESENCHYMAL | BDKRB2   | 205870 at   |
| VERHAAK_GLIOBLASTOMA_MESENCHYMAL | HK3      | 205936 s at |
| VERHAAK_GLIOBLASTOMA_MESENCHYMAL | EFEMP2   | 206580 s at |
| VERHAAK_GLIOBLASTOMA_MESENCHYMAL | PTPN6    | 206687 s at |
| VERHAAK_GLIOBLASTOMA_MESENCHYMAL | ACSL1    | 207275 s at |
| VERHAAK_GLIOBLASTOMA_MESENCHYMAL | TGFBR2   | 207334 s at |
| VERHAAK_GLIOBLASTOMA_MESENCHYMAL | IL15RA   | 207375 s at |
| VERHAAK_GLIOBLASTOMA_MESENCHYMAL | CAST     | 207467 x at |
| VERHAAK_GLIOBLASTOMA_MESENCHYMAL | TNFRSF1A | 207643 s at |
| VERHAAK_GLIOBLASTOMA_MESENCHYMAL | NCF4     | 207677 s at |
| VERHAAK_GLIOBLASTOMA_MESENCHYMAL | AMPD3    | 207992 s at |



|                                  |         |        |      |
|----------------------------------|---------|--------|------|
| VERHAAK_GLIOBLASTOMA_MESENCHYMAL | MAN1A1  | 208116 | s at |
| VERHAAK_GLIOBLASTOMA_MESENCHYMAL | PDPN    | 208233 | at   |
| VERHAAK_GLIOBLASTOMA_MESENCHYMAL | TNFAIP8 | 208296 | x at |
| VERHAAK_GLIOBLASTOMA_MESENCHYMAL | LILRB3  | 208594 | x at |
| VERHAAK_GLIOBLASTOMA_MESENCHYMAL | CLIC1   | 208659 | at   |
| VERHAAK_GLIOBLASTOMA_MESENCHYMAL | CAST    | 208908 | s at |
| VERHAAK_GLIOBLASTOMA_MESENCHYMAL | TGFBR2  | 208944 | at   |
| VERHAAK_GLIOBLASTOMA_MESENCHYMAL | LGALS3  | 208949 | s at |
| VERHAAK_GLIOBLASTOMA_MESENCHYMAL | MRC2    | 209280 | at   |
| VERHAAK_GLIOBLASTOMA_MESENCHYMAL | SWAP70  | 209306 | s at |
| VERHAAK_GLIOBLASTOMA_MESENCHYMAL | SWAP70  | 209307 | at   |
| VERHAAK_GLIOBLASTOMA_MESENCHYMAL | UAP1    | 209340 | at   |
| VERHAAK_GLIOBLASTOMA_MESENCHYMAL | EFEMP2  | 209356 | x at |
| VERHAAK_GLIOBLASTOMA_MESENCHYMAL | STXBP2  | 209367 | at   |
| VERHAAK_GLIOBLASTOMA_MESENCHYMAL | CHI3L1  | 209395 | at   |
| VERHAAK_GLIOBLASTOMA_MESENCHYMAL | CHI3L1  | 209396 | s at |
| VERHAAK_GLIOBLASTOMA_MESENCHYMAL | AMPD3   | 209491 | s at |
| VERHAAK_GLIOBLASTOMA_MESENCHYMAL | RAB27A  | 209514 | s at |
| VERHAAK_GLIOBLASTOMA_MESENCHYMAL | RAB27A  | 209515 | s at |
| VERHAAK_GLIOBLASTOMA_MESENCHYMAL | CLEC2B  | 209732 | at   |
| VERHAAK_GLIOBLASTOMA_MESENCHYMAL | NCF2    | 209949 | at   |
| VERHAAK_GLIOBLASTOMA_MESENCHYMAL | CTSZ    | 210042 | s at |
| VERHAAK_GLIOBLASTOMA_MESENCHYMAL | LILRB3  | 210225 | x at |
| VERHAAK_GLIOBLASTOMA_MESENCHYMAL | TNFAIP8 | 210260 | s at |
| VERHAAK_GLIOBLASTOMA_MESENCHYMAL | SWAP70  | 210369 | at   |
| VERHAAK_GLIOBLASTOMA_MESENCHYMAL | SLC11A1 | 210422 | x at |
| VERHAAK_GLIOBLASTOMA_MESENCHYMAL | SLC11A1 | 210423 | s at |
| VERHAAK_GLIOBLASTOMA_MESENCHYMAL | ANXA2   | 210427 | x at |
| VERHAAK_GLIOBLASTOMA_MESENCHYMAL | SAT1    | 210592 | s at |
| VERHAAK_GLIOBLASTOMA_MESENCHYMAL | SAT1    | 210593 | at   |
| VERHAAK_GLIOBLASTOMA_MESENCHYMAL | LILRB3  | 210784 | x at |
| VERHAAK_GLIOBLASTOMA_MESENCHYMAL | IQGAP1  | 210840 | s at |
| VERHAAK_GLIOBLASTOMA_MESENCHYMAL | PLAUR   | 210845 | s at |
| VERHAAK_GLIOBLASTOMA_MESENCHYMAL | FCGR2B  | 210889 | s at |
| VERHAAK_GLIOBLASTOMA_MESENCHYMAL | RAB27A  | 210951 | x at |
| VERHAAK_GLIOBLASTOMA_MESENCHYMAL | LILRB3  | 211133 | x at |
| VERHAAK_GLIOBLASTOMA_MESENCHYMAL | LILRB3  | 211135 | x at |
| VERHAAK_GLIOBLASTOMA_MESENCHYMAL | LRRFIP1 | 211452 | x at |
| VERHAAK_GLIOBLASTOMA_MESENCHYMAL | PLAU    | 211668 | s at |
| VERHAAK_GLIOBLASTOMA_MESENCHYMAL | MYOF    | 211864 | s at |
| VERHAAK_GLIOBLASTOMA_MESENCHYMAL | PLAUR   | 211924 | s at |
| VERHAAK_GLIOBLASTOMA_MESENCHYMAL | TGOLN2  | 212040 | at   |
| VERHAAK_GLIOBLASTOMA_MESENCHYMAL | TGOLN2  | 212043 | at   |

|                                  |           |        |      |
|----------------------------------|-----------|--------|------|
| VERHAAK_GLIOBLASTOMA_MESENCHYMAL | CTSZ      | 212562 | s at |
| VERHAAK_GLIOBLASTOMA_MESENCHYMAL | CAST      | 212580 | at   |
| VERHAAK_GLIOBLASTOMA_MESENCHYMAL | CAST      | 212586 | at   |
| VERHAAK_GLIOBLASTOMA_MESENCHYMAL | LHFPL2    | 212658 | at   |
| VERHAAK_GLIOBLASTOMA_MESENCHYMAL | IQGAP1    | 213446 | s at |
| VERHAAK_GLIOBLASTOMA_MESENCHYMAL | ANXA2     | 213503 | x at |
| VERHAAK_GLIOBLASTOMA_MESENCHYMAL | SAT1      | 213988 | s at |
| VERHAAK_GLIOBLASTOMA_MESENCHYMAL | VAMP5     | 214115 | at   |
| VERHAAK_GLIOBLASTOMA_MESENCHYMAL | FPR3      | 214560 | at   |
| VERHAAK_GLIOBLASTOMA_MESENCHYMAL | SFT2D2    | 214838 | at   |
| VERHAAK_GLIOBLASTOMA_MESENCHYMAL | SHC1      | 214853 | s at |
| VERHAAK_GLIOBLASTOMA_MESENCHYMAL | PLAUR     | 214866 | at   |
| VERHAAK_GLIOBLASTOMA_MESENCHYMAL | SEC24D    | 215209 | at   |
| VERHAAK_GLIOBLASTOMA_MESENCHYMAL | LRRFIP1   | 215375 | x at |
| VERHAAK_GLIOBLASTOMA_MESENCHYMAL | PLK3      | 215462 | at   |
| VERHAAK_GLIOBLASTOMA_MESENCHYMAL | IL1R1     | 215561 | s at |
| VERHAAK_GLIOBLASTOMA_MESENCHYMAL | SEC24D    | 215641 | at   |
| VERHAAK_GLIOBLASTOMA_MESENCHYMAL | CD4       | 216424 | at   |
| VERHAAK_GLIOBLASTOMA_MESENCHYMAL | CHI3L1    | 216546 | s at |
| VERHAAK_GLIOBLASTOMA_MESENCHYMAL | SRPX2     | 216639 | at   |
| VERHAAK_GLIOBLASTOMA_MESENCHYMAL | RUNX2     | 216994 | s at |
| VERHAAK_GLIOBLASTOMA_MESENCHYMAL | SLC11A1   | 217473 | x at |
| VERHAAK_GLIOBLASTOMA_MESENCHYMAL | TYMP      | 217497 | at   |
| VERHAAK_GLIOBLASTOMA_MESENCHYMAL | SLC11A1   | 217507 | at   |
| VERHAAK_GLIOBLASTOMA_MESENCHYMAL | MYOF      | 217518 | at   |
| VERHAAK_GLIOBLASTOMA_MESENCHYMAL | FXYD5     | 217655 | at   |
| VERHAAK_GLIOBLASTOMA_MESENCHYMAL | SLC16A3   | 217691 | x at |
| VERHAAK_GLIOBLASTOMA_MESENCHYMAL | TMBIM1    | 217730 | at   |
| VERHAAK_GLIOBLASTOMA_MESENCHYMAL | RBM47     | 218035 | s at |
| VERHAAK_GLIOBLASTOMA_MESENCHYMAL | FXYD5     | 218084 | x at |
| VERHAAK_GLIOBLASTOMA_MESENCHYMAL | CDCP1     | 218451 | at   |
| VERHAAK_GLIOBLASTOMA_MESENCHYMAL | PLBD1     | 218454 | at   |
| VERHAAK_GLIOBLASTOMA_MESENCHYMAL | FHOD1     | 218530 | at   |
| VERHAAK_GLIOBLASTOMA_MESENCHYMAL | CLCF1     | 219500 | at   |
| VERHAAK_GLIOBLASTOMA_MESENCHYMAL | COPZ2     | 219561 | at   |
| VERHAAK_GLIOBLASTOMA_MESENCHYMAL | RAB11FIP1 | 219681 | s at |
| VERHAAK_GLIOBLASTOMA_MESENCHYMAL | ARSJ      | 219973 | at   |
| VERHAAK_GLIOBLASTOMA_MESENCHYMAL | NOD2      | 220066 | at   |
| VERHAAK_GLIOBLASTOMA_MESENCHYMAL | C5AR1     | 220088 | at   |
| VERHAAK_GLIOBLASTOMA_MESENCHYMAL | BNC2      | 220272 | at   |
| VERHAAK_GLIOBLASTOMA_MESENCHYMAL | RUNX2     | 221282 | x at |
| VERHAAK_GLIOBLASTOMA_MESENCHYMAL | RUNX2     | 221283 | at   |
| VERHAAK_GLIOBLASTOMA_MESENCHYMAL | MAN1A1    | 221760 | at   |

|                                    |          |             |
|------------------------------------|----------|-------------|
| VERHAAK_GLIOMASTOMA_MESENCHYMAL    | PHF11    | 221816_s_at |
| VERHAAK_GLIOMASTOMA_MESENCHYMAL    | EHD2     | 221870_at   |
| VERHAAK_GLIOMASTOMA_MESENCHYMAL    | PDPN     | 221898_at   |
| VERHAAK_GLIOMASTOMA_MESENCHYMAL    | COL8A2   | 221900_at   |
| VERHAAK_GLIOMASTOMA_MESENCHYMAL    | RAB27A   | 222294_s_at |
| VERHAAK_GLIOMASTOMA_MESENCHYMAL    | ELF4     | 31845_at    |
| VERHAAK_GLIOMASTOMA_MESENCHYMAL    | MRC2     | 37408_at    |
| VERHAAK_GLIOMASTOMA_MESENCHYMAL    | STAB1    | 38487_at    |
| VERHAAK_GLIOMASTOMA_MESENCHYMAL    | EHD2     | 45297_at    |
| VERHAAK_GLIOMASTOMA_MESENCHYMAL    | COL8A2   | 52651_at    |
| GO: 0048699: generation of neurons | HDAC1    | 201209_at   |
| GO: 0048699: generation of neurons | ID2      | 201565_s_at |
| GO: 0048699: generation of neurons | ID2      | 201566_x_at |
| GO: 0048699: generation of neurons | PLK2     | 201939_at   |
| GO: 0048699: generation of neurons | ARHGAP35 | 202044_at   |
| GO: 0048699: generation of neurons | ARHGAP35 | 202045_s_at |
| GO: 0048699: generation of neurons | ARHGAP35 | 202046_s_at |
| GO: 0048699: generation of neurons | SPOCK1   | 202363_at   |
| GO: 0048699: generation of neurons | PPP3CB   | 202432_at   |
| GO: 0048699: generation of neurons | HDAC5    | 202455_at   |
| GO: 0048699: generation of neurons | TRIOBP   | 202795_x_at |
| GO: 0048699: generation of neurons | AGT      | 202834_at   |
| GO: 0048699: generation of neurons | DDIT4    | 202887_s_at |
| GO: 0048699: generation of neurons | BIN1     | 202931_x_at |
| GO: 0048699: generation of neurons | SEMA3B   | 203070_at   |
| GO: 0048699: generation of neurons | SEMA3B   | 203071_at   |
| GO: 0048699: generation of neurons | PTK2B    | 203110_at   |
| GO: 0048699: generation of neurons | PTK2B    | 203111_s_at |
| GO: 0048699: generation of neurons | HES1     | 203393_at   |
| GO: 0048699: generation of neurons | HES1     | 203394_s_at |
| GO: 0048699: generation of neurons | HES1     | 203395_s_at |
| GO: 0048699: generation of neurons | LDB1     | 203451_at   |
| GO: 0048699: generation of neurons | SEMA4D   | 203528_at   |
| GO: 0048699: generation of neurons | RAP1GAP  | 203911_at   |
| GO: 0048699: generation of neurons | PBX3     | 204082_at   |
| GO: 0048699: generation of neurons | CDK5     | 204247_s_at |
| GO: 0048699: generation of neurons | EDNRB    | 204271_s_at |
| GO: 0048699: generation of neurons | EDNRB    | 204273_at   |
| GO: 0048699: generation of neurons | NEO1     | 204321_at   |
| GO: 0048699: generation of neurons | ARHGAP4  | 204425_at   |
| GO: 0048699: generation of neurons | GNAO1    | 204762_s_at |
| GO: 0048699: generation of neurons | GNAO1    | 204763_s_at |
| GO: 0048699: generation of neurons | DCX      | 204850_s_at |

|                                    |         |             |
|------------------------------------|---------|-------------|
| GO: 0048699: generation of neurons | DCX     | 204851 s at |
| GO: 0048699: generation of neurons | IL6ST   | 204863 s at |
| GO: 0048699: generation of neurons | IL6ST   | 204864 s at |
| GO: 0048699: generation of neurons | ATF5    | 204998 s at |
| GO: 0048699: generation of neurons | ATF5    | 204999 s at |
| GO: 0048699: generation of neurons | DCT     | 205337 at   |
| GO: 0048699: generation of neurons | DCT     | 205338 s at |
| GO: 0048699: generation of neurons | DPYSL4  | 205492 s at |
| GO: 0048699: generation of neurons | DPYSL4  | 205493 s at |
| GO: 0048699: generation of neurons | AVIL    | 205539 at   |
| GO: 0048699: generation of neurons | NCAM2   | 205669 at   |
| GO: 0048699: generation of neurons | TULP3   | 205854 at   |
| GO: 0048699: generation of neurons | NGFR    | 205858 at   |
| GO: 0048699: generation of neurons | GRIN1   | 205914 s at |
| GO: 0048699: generation of neurons | GRIN1   | 205915 x at |
| GO: 0048699: generation of neurons | PLXNB3  | 205957 at   |
| GO: 0048699: generation of neurons | BRAF    | 206044 s at |
| GO: 0048699: generation of neurons | LLGL1   | 206123 at   |
| GO: 0048699: generation of neurons | LLGL1   | 206124 s at |
| GO: 0048699: generation of neurons | NEUROD1 | 206282 at   |
| GO: 0048699: generation of neurons | ANK3    | 206385 s at |
| GO: 0048699: generation of neurons | INSM1   | 206502 s at |
| GO: 0048699: generation of neurons | MAP4K4  | 206571 s at |
| GO: 0048699: generation of neurons | SKIL    | 206675 s at |
| GO: 0048699: generation of neurons | EDNRB   | 206701 x at |
| GO: 0048699: generation of neurons | PTK7    | 207011 s at |
| GO: 0048699: generation of neurons | MAPK6   | 207121 s at |
| GO: 0048699: generation of neurons | CRTC1   | 207159 x at |
| GO: 0048699: generation of neurons | CDON    | 207230 at   |
| GO: 0048699: generation of neurons | PLXNA2  | 207290 at   |
| GO: 0048699: generation of neurons | MAGI2   | 207702 s at |
| GO: 0048699: generation of neurons | ANK3    | 207950 s at |
| GO: 0048699: generation of neurons | LBX1    | 208380 at   |
| GO: 0048699: generation of neurons | LMX1B   | 208487 at   |
| GO: 0048699: generation of neurons | PTCH1   | 208522 s at |
| GO: 0048699: generation of neurons | PLXNB2  | 208890 s at |
| GO: 0048699: generation of neurons | TCF12   | 208986 at   |
| GO: 0048699: generation of neurons | NR2F2   | 209119 x at |
| GO: 0048699: generation of neurons | NR2F2   | 209120 at   |
| GO: 0048699: generation of neurons | NR2F2   | 209121 x at |
| GO: 0048699: generation of neurons | CXCR4   | 209201 x at |
| GO: 0048699: generation of neurons | TSC1    | 209390 at   |
| GO: 0048699: generation of neurons | ANK3    | 209442 x at |

|                                    |         |             |
|------------------------------------|---------|-------------|
| GO: 0048699: generation of neurons | MAGI2   | 209737 at   |
| GO: 0048699: generation of neurons | PTCH1   | 209815 at   |
| GO: 0048699: generation of neurons | PTCH1   | 209816 at   |
| GO: 0048699: generation of neurons | PPP3CB  | 209817 at   |
| GO: 0048699: generation of neurons | VLDLR   | 209822 s at |
| GO: 0048699: generation of neurons | LRRN3   | 209840 s at |
| GO: 0048699: generation of neurons | LRRN3   | 209841 s at |
| GO: 0048699: generation of neurons | ADGRL3  | 209866 s at |
| GO: 0048699: generation of neurons | ADGRL3  | 209867 s at |
| GO: 0048699: generation of neurons | MAP2    | 210015 s at |
| GO: 0048699: generation of neurons | RND1    | 210056 at   |
| GO: 0048699: generation of neurons | BIN1    | 210201 x at |
| GO: 0048699: generation of neurons | BIN1    | 210202 s at |
| GO: 0048699: generation of neurons | TRIOBP  | 210276 s at |
| GO: 0048699: generation of neurons | BCL11A  | 210347 s at |
| GO: 0048699: generation of neurons | FLRT1   | 210414 at   |
| GO: 0048699: generation of neurons | AVIL    | 210507 s at |
| GO: 0048699: generation of neurons | RAP1GAP | 210618 at   |
| GO: 0048699: generation of neurons | GRIN1   | 210781 x at |
| GO: 0048699: generation of neurons | GRIN1   | 210782 x at |
| GO: 0048699: generation of neurons | IL6ST   | 211000 s at |
| GO: 0048699: generation of neurons | GRIN1   | 211125 x at |
| GO: 0048699: generation of neurons | PLXNB2  | 211472 at   |
| GO: 0048699: generation of neurons | CXCR4   | 211919 s at |
| GO: 0048699: generation of neurons | IL6ST   | 212195 at   |
| GO: 0048699: generation of neurons | IL6ST   | 212196 at   |
| GO: 0048699: generation of neurons | AGRN    | 212283 at   |
| GO: 0048699: generation of neurons | AGRN    | 212285 s at |
| GO: 0048699: generation of neurons | USP33   | 212513 s at |
| GO: 0048699: generation of neurons | HRAS    | 212983 at   |
| GO: 0048699: generation of neurons | PLXNA2  | 213030 s at |
| GO: 0048699: generation of neurons | NPTXR   | 213040 s at |
| GO: 0048699: generation of neurons | CRTC1   | 213091 at   |
| GO: 0048699: generation of neurons | SRC     | 213324 at   |
| GO: 0048699: generation of neurons | ID2     | 213931 at   |
| GO: 0048699: generation of neurons | DPYSL4  | 214301 s at |
| GO: 0048699: generation of neurons | BIN1    | 214439 x at |
| GO: 0048699: generation of neurons | BIN1    | 214643 x at |
| GO: 0048699: generation of neurons | MEGF8   | 214778 at   |
| GO: 0048699: generation of neurons | BRINP2  | 214822 at   |
| GO: 0048699: generation of neurons | USP33   | 214843 s at |
| GO: 0048699: generation of neurons | NR2F2   | 215073 s at |
| GO: 0048699: generation of neurons | DOCK10  | 215151 at   |

|                                    |          |             |
|------------------------------------|----------|-------------|
| GO: 0048699: generation of neurons | TNN      | 215271 at   |
| GO: 0048699: generation of neurons | TCF12    | 215611 at   |
| GO: 0048699: generation of neurons | PLXNB1   | 215668 s at |
| GO: 0048699: generation of neurons | PLXNB1   | 215807 s at |
| GO: 0048699: generation of neurons | SKIL     | 215889 at   |
| GO: 0048699: generation of neurons | GNAO1    | 215912 at   |
| GO: 0048699: generation of neurons | TRIOBP   | 216210 x at |
| GO: 0048699: generation of neurons | TGIF2    | 216262 s at |
| GO: 0048699: generation of neurons | DCT      | 216512 s at |
| GO: 0048699: generation of neurons | DCT      | 216513 at   |
| GO: 0048699: generation of neurons | CXCR4    | 217028 at   |
| GO: 0048699: generation of neurons | NPTXR    | 217041 at   |
| GO: 0048699: generation of neurons | ATF5     | 217389 s at |
| GO: 0048699: generation of neurons | AGRN     | 217410 at   |
| GO: 0048699: generation of neurons | AGRN     | 217419 x at |
| GO: 0048699: generation of neurons | USP33    | 217441 at   |
| GO: 0048699: generation of neurons | SKIL     | 217591 at   |
| GO: 0048699: generation of neurons | MAP4K4   | 218181 s at |
| GO: 0048699: generation of neurons | TGIF2    | 218724 s at |
| GO: 0048699: generation of neurons | CHD7     | 218829 s at |
| GO: 0048699: generation of neurons | TMEM106B | 218930 s at |
| GO: 0048699: generation of neurons | DOCK10   | 219279 at   |
| GO: 0048699: generation of neurons | BCL11A   | 219497 s at |
| GO: 0048699: generation of neurons | BCL11A   | 219498 s at |
| GO: 0048699: generation of neurons | DLL3     | 219537 x at |
| GO: 0048699: generation of neurons | PCDH12   | 219656 at   |
| GO: 0048699: generation of neurons | SPTBN5   | 220067 at   |
| GO: 0048699: generation of neurons | MYLIP    | 220319 s at |
| GO: 0048699: generation of neurons | CRB1     | 220522 at   |
| GO: 0048699: generation of neurons | CHD7     | 220619 at   |
| GO: 0048699: generation of neurons | SRC      | 221281 at   |
| GO: 0048699: generation of neurons | SRC      | 221284 s at |
| GO: 0048699: generation of neurons | PLXNA1   | 221537 at   |
| GO: 0048699: generation of neurons | PLXNA1   | 221538 s at |
| GO: 0048699: generation of neurons | TULP3    | 221964 at   |
| GO: 0048699: generation of neurons | LDB1     | 35160 at    |

**Table S2: List of differentially expressed genes in SN- vs DMSO-treated GSC TS543.**

| <b>Gene symbol</b> | <b>Fold change (SN/DMSO)</b> | <b>Padj value</b> |
|--------------------|------------------------------|-------------------|
| PIM1               | 92.120                       | 0                 |
| PCSK9              | 76.844                       | 0                 |
| FABP3              | 65.413                       | 0                 |
| GADD45G            | 64.259                       | 0                 |
| PHYHIP             | 53.775                       | 0                 |
| IL21R              | 52.219                       | 0                 |
| MAFF               | 50.502                       | 0                 |
| LIPG               | 49.673                       | 0                 |
| PRDX3P1            | 46.527                       | 0                 |
| PHLDA2             | 44.343                       | 0                 |
| HMGCS1             | 42.654                       | 0                 |
| TFCP2L1            | 40.964                       | 0                 |
| PIP4P1             | 38.582                       | 0                 |
| PCBP2-OT1          | 37.025                       | 0                 |
| RUSC1-AS1          | 36.720                       | 0                 |
| TINCR              | 35.317                       | 1.06E-13          |
| GDF15              | 31.386                       | 0                 |
| MYBPC2             | 30.926                       | 0                 |
| TMEM191B           | 28.956                       | 0                 |
| DDIT3              | 28.756                       | 0                 |
| SLC7A5P2           | 28.026                       | 0                 |
| ACSS2              | 27.827                       | 0                 |
| INSIG1             | 27.365                       | 0                 |
| FGF21              | 26.451                       | 0                 |
| HIST1H1E           | 26.321                       | 1.35E-12          |
| PLA2G3             | 25.009                       | 0                 |
| MICA               | 24.575                       | 0                 |
| PPP1R15A           | 23.889                       | 0                 |
| HSD17B7P2          | 23.331                       | 0                 |
| RPL29P14           | 23.316                       | 7.51E-05          |
| NR4A3              | 23.233                       | 0                 |
| MVD                | 22.274                       | 0                 |
| ICAM1              | 21.192                       | 0                 |
| MSMO1              | 20.954                       | 0                 |
| BBC3               | 20.442                       | 0                 |
| NR1D1              | 20.101                       | 0                 |
| DRD4               | 19.818                       | 0                 |
| HSPA1B             | 19.738                       | 0.000181622       |
| AQP3               | 19.554                       | 0                 |
| PLK2               | 19.465                       | 0                 |
| ATF3               | 19.255                       | 0                 |
| BIRC7              | 19.244                       | 1.94E-07          |

|             |        |            |
|-------------|--------|------------|
| RTN4R       | 19.102 | 0          |
| IGSF6       | 18.974 | 1.21E-11   |
| DERL3       | 18.679 | 0          |
| YOD1        | 18.507 | 0          |
| NEU1        | 18.262 | 0          |
| RPSAP36     | 17.221 | 4.16E-12   |
| DUSP8       | 16.923 | 0          |
| FUT3        | 16.817 | 2.16E-05   |
| MXD1        | 16.466 | 0          |
| CHST1       | 16.450 | 1.83E-07   |
| RN7SK       | 16.306 | 8.48E-11   |
| RN7SKP23    | 16.086 | 0          |
| IDI1        | 15.960 | 0          |
| GLIPR1      | 15.785 | 0          |
| LRRC70      | 15.559 | 2.86E-07   |
| SNORA53     | 15.476 | 0.00136322 |
| CDHR1       | 15.427 | 0          |
| FIBCD1      | 15.119 | 3.72E-06   |
| PLIN4       | 15.118 | 0          |
| USP3-AS1    | 14.865 | 8.51E-07   |
| PLK5        | 14.820 | 0          |
| DNAJB9      | 14.799 | 0          |
| BGLAP       | 14.765 | 9.82E-05   |
| EHMT2-AS1   | 14.746 | 5.96E-06   |
| GPR182      | 14.635 | 1.31E-10   |
| SDS         | 14.352 | 3.47E-05   |
| EID3        | 14.335 | 2.94E-07   |
| FA2H        | 14.315 | 0          |
| PTHLH       | 14.236 | 0          |
| SLC30A3     | 14.228 | 0          |
| CABP7       | 13.868 | 0          |
| CREBRF      | 13.774 | 0          |
| CYR61       | 13.659 | 0          |
| GPRC5A      | 13.655 | 0          |
| DHCR7       | 13.184 | 0          |
| BANCR       | 12.901 | 4.74E-10   |
| SIX2        | 12.795 | 0          |
| CARS-AS1    | 12.775 | 4.70E-10   |
| ANKRD10-IT1 | 12.750 | 0          |
| CPEB1       | 12.731 | 0          |
| KLF11       | 12.685 | 0          |
| LINC02019   | 12.651 | 0          |
| ADGRF3      | 12.596 | 2.44E-08   |
| SNORD3B-1   | 12.501 | 8.01E-10   |
| SERINC2     | 12.413 | 0          |



|           |        |             |
|-----------|--------|-------------|
| TRIM63    | 12.381 | 0           |
| ACAT2     | 12.305 | 0           |
| COL8A2    | 12.274 | 0           |
| MUC22     | 12.068 | 0.002192858 |
| PBX4      | 11.998 | 8.09E-08    |
| SLC26A6   | 11.860 | 0           |
| PIK3IP1   | 11.844 | 0           |
| SOCS1     | 11.842 | 0           |
| OTUD1     | 11.678 | 0           |
| ACHE      | 11.619 | 0           |
| PER1      | 11.381 | 0           |
| CELF2-AS1 | 11.281 | 0           |
| MAPT-IT1  | 11.178 | 0.000357599 |
| RBM5-AS1  | 11.106 | 0           |
| ELAVL3    | 11.015 | 0           |
| CHRD      | 11.000 | 1.25E-08    |
| KLF6      | 10.988 | 0           |
| LDLR      | 10.983 | 0           |
| SIK1      | 10.877 | 0           |
| MVK       | 10.823 | 0           |
| PLXDC1    | 10.752 | 0           |
| FAM131C   | 10.738 | 6.20E-12    |
| USP17L11  | 10.699 | 0.000528457 |
| SIK1B     | 10.697 | 0           |
| CYP51A1P2 | 10.696 | 0           |
| VASN      | 10.507 | 0           |
| SNORD3A   | 10.395 | 6.85E-07    |
| VPS37D    | 10.271 | 0           |
| CRACR2B   | 10.236 | 0           |
| MKNK2     | 10.194 | 0           |
| PTGES     | 10.125 | 0           |
| GADD45B   | 10.112 | 0           |
| SAP25     | 9.980  | 4.86E-11    |
| CILP2     | 9.950  | 0           |
| SPDEF     | 9.926  | 0.000251904 |
| ATP6V1C2  | 9.911  | 1.16E-08    |
| IGFN1     | 9.881  | 0.000607022 |
| LINC-PINT | 9.779  | 0           |
| CYP51A1   | 9.590  | 0           |
| TSIX      | 9.540  | 4.57E-07    |
| RN7SKP255 | 9.514  | 0.001520422 |
| NKX1-2    | 9.513  | 1.20E-06    |
| C1QTNF12  | 9.496  | 6.44E-15    |
| STARD4    | 9.370  | 0           |
| SEMA3F    | 9.273  | 0           |

|            |       |             |
|------------|-------|-------------|
| TSC22D3    | 9.262 | 0           |
| CRYAB      | 9.215 | 0           |
| KCNJ4      | 9.215 | 0           |
| RASD1      | 9.193 | 0.000133048 |
| BLOC1S3    | 9.156 | 0           |
| NRTN       | 9.122 | 0           |
| CLDN4      | 9.114 | 0           |
| HAP1       | 9.112 | 0           |
| CIART      | 9.081 | 0           |
| CYP51A1P1  | 9.045 | 0           |
| TBC1D26    | 9.011 | 0.001824891 |
| SCDP1      | 8.929 | 0           |
| CDHR5      | 8.686 | 3.10E-12    |
| SLC20A1    | 8.683 | 0           |
| EPHA1      | 8.681 | 3.15E-06    |
| JUND       | 8.668 | 0           |
| EBP        | 8.664 | 0           |
| NAT16      | 8.659 | 0           |
| CSF1       | 8.576 | 0           |
| SLC43A3    | 8.573 | 0           |
| LIF        | 8.550 | 0           |
| ARL4C      | 8.508 | 0           |
| MAPT-AS1   | 8.446 | 0.001393231 |
| MIR193BHG  | 8.427 | 1.59E-09    |
| DBP        | 8.423 | 0           |
| MRPL23-AS1 | 8.379 | 9.54E-12    |
| TMEM97     | 8.360 | 0           |
| SQLE       | 8.336 | 0           |
| MICB       | 8.326 | 0           |
| VAT1       | 8.320 | 0           |
| ADAMTS14   | 8.318 | 0           |
| FMNL1      | 8.274 | 0.047791301 |
| H19        | 8.147 | 0           |
| CAPN12     | 8.110 | 0           |
| BEX2       | 8.095 | 0           |
| CDKN1A     | 8.029 | 0           |
| HMGCR      | 8.008 | 0           |
| SCD        | 8.001 | 0           |
| SELENOM    | 7.976 | 2.62E-06    |
| POU5F1P3   | 7.895 | 0.000132054 |
| TMEM151A   | 7.889 | 0.004867028 |
| ERG28      | 7.721 | 0           |
| CD68       | 7.715 | 8.88E-16    |
| TEX29      | 7.702 | 4.63E-07    |
| MAP1LC3C   | 7.650 | 0.036581403 |

|           |       |             |
|-----------|-------|-------------|
| GSDMB     | 7.601 | 0           |
| ELF4      | 7.579 | 0           |
| IFITM10   | 7.547 | 8.45E-08    |
| MAG       | 7.505 | 6.72E-05    |
| DMKN      | 7.501 | 0.001430763 |
| NIPAL4    | 7.449 | 0           |
| SPATA31A3 | 7.364 | 3.77E-07    |
| CLK1      | 7.308 | 0           |
| HIST2H2BE | 7.261 | 0           |
| GEM       | 7.200 | 0           |
| VGf       | 7.194 | 0           |
| CCT6P1    | 7.142 | 0           |
| SHISA9    | 7.108 | 0           |
| FDFT1     | 7.100 | 0           |
| SDCBP2    | 7.079 | 0           |
| SH2D3C    | 7.076 | 9.57E-07    |
| PRRT2     | 7.062 | 0           |
| AHNAK     | 7.029 | 0           |
| KCNF1     | 6.966 | 0           |
| MIAT      | 6.934 | 0           |
| ZFP36L1   | 6.918 | 0           |
| LINC00598 | 6.912 | 0           |
| HES4      | 6.912 | 0           |
| LINC01529 | 6.895 | 1.73E-13    |
| ABHD4     | 6.892 | 0           |
| SERPINE1  | 6.854 | 0           |
| EFNA1     | 6.829 | 0           |
| MALAT1    | 6.815 | 4.30E-12    |
| GGT7      | 6.799 | 0           |
| HSD17B7   | 6.777 | 0           |
| ZFAND2B   | 6.773 | 0           |
| UNC13A    | 6.759 | 0           |
| UBALD1    | 6.743 | 0           |
| ZNF750    | 6.740 | 0.000945603 |
| CISH      | 6.717 | 0           |
| SH2D5     | 6.702 | 0           |
| NFIL3     | 6.696 | 0           |
| FGFBP3    | 6.679 | 0           |
| AOC2      | 6.556 | 0           |
| TMEM262   | 6.553 | 6.83E-08    |
| XIRP2     | 6.519 | 0.032311935 |
| OSER1     | 6.498 | 0           |
| RFTN1     | 6.498 | 6.10E-08    |
| CCDC9     | 6.497 | 0           |
| MFAP4     | 6.489 | 0           |

|           |       |             |
|-----------|-------|-------------|
| EPPK1     | 6.481 | 0.003838988 |
| SC5D      | 6.476 | 0           |
| TF        | 6.422 | 0           |
| CLCN6     | 6.407 | 0           |
| TMEM191C  | 6.378 | 5.03E-08    |
| ALMS1-IT1 | 6.374 | 0           |
| MUC16     | 6.338 | 0.003108876 |
| SNHG22    | 6.329 | 1.49E-11    |
| HSPA1A    | 6.319 | 0.008051836 |
| RNA5-8SN1 | 6.316 | 0           |
| RNA5-8SN2 | 6.316 | 0           |
| RNA5-8SN4 | 6.316 | 0           |
| PSD2      | 6.290 | 2.22E-16    |
| TRIM22    | 6.284 | 0.031324283 |
| CCT6P3    | 6.254 | 0           |
| OR7D2     | 6.235 | 6.25E-10    |
| FTL       | 6.219 | 0           |
| NAMPTP1   | 6.202 | 0           |
| NSDHL     | 6.166 | 0           |
| C2CD4C    | 6.119 | 4.04E-05    |
| RAB3IL1   | 6.098 | 0           |
| MAFK      | 6.091 | 0           |
| PNP       | 6.088 | 0           |
| DNAJB1    | 6.056 | 8.51E-06    |
| PRR5L     | 6.044 | 0           |
| EIF2AK3   | 6.038 | 0           |
| SALL4     | 6.033 | 2.94E-08    |
| LPIN1     | 6.030 | 0           |
| SPATA31D1 | 6.020 | 0.015868449 |
| MEG3      | 6.019 | 2.79E-11    |
| ARHGEF5   | 6.007 | 0.001484194 |
| NUPR1     | 6.005 | 0           |
| PATL1     | 5.955 | 0           |
| CCDC28B   | 5.944 | 0           |
| MIR17HG   | 5.936 | 4.15E-11    |
| SMG1P3    | 5.922 | 0           |
| IDI2-AS1  | 5.918 | 1.47E-09    |
| PRELID3A  | 5.916 | 0           |
| OVGP1     | 5.915 | 0           |
| TMEM75    | 5.877 | 0           |
| FTLP3     | 5.870 | 0           |
| KPRP      | 5.869 | 0.044115603 |
| RGS3      | 5.831 | 0           |
| MAGEL2    | 5.818 | 0.020326532 |
| TMEM54    | 5.808 | 5.62E-06    |

|              |       |             |
|--------------|-------|-------------|
| MIIP         | 5.791 | 0           |
| GABARAPL1    | 5.784 | 0           |
| TXNIP        | 5.782 | 0           |
| PANX2        | 5.737 | 1.24E-06    |
| FLNC         | 5.733 | 0           |
| IER5L        | 5.724 | 0           |
| KIF2B        | 5.703 | 0.036886947 |
| RN7SKP203    | 5.700 | 0.003907456 |
| TNFRSF14     | 5.691 | 0           |
| SNCB         | 5.687 | 1.04E-13    |
| DUSP1        | 5.686 | 0           |
| NAMPT        | 5.670 | 0           |
| EEF1A2       | 5.652 | 0           |
| SLC3A1       | 5.620 | 0.036138469 |
| ZNF518B      | 5.619 | 0.014522357 |
| MUC12        | 5.610 | 0.00096329  |
| RBM15        | 5.608 | 0           |
| LINC00824    | 5.607 | 0           |
| BAIAP2       | 5.599 | 0           |
| PLK3         | 5.574 | 0           |
| MEF2B        | 5.557 | 0           |
| JSRP1        | 5.550 | 2.00E-15    |
| TNFRSF12A    | 5.547 | 0           |
| KCNQ1OT1     | 5.506 | 1.28E-10    |
| TNFRSF14-AS1 | 5.505 | 0           |
| PTPRH        | 5.463 | 0.040397652 |
| CKS2         | 5.462 | 0           |
| ARFGAP1      | 5.460 | 0           |
| ZMYM5        | 5.446 | 0           |
| CYP2D7       | 5.430 | 1.11E-16    |
| BMS1P10      | 5.427 | 0           |
| WNT5B        | 5.418 | 0           |
| MAFA-AS1     | 5.405 | 0.036950265 |
| RDH16        | 5.382 | 2.29E-06    |
| HIST1H4E     | 5.376 | 0.001118066 |
| BCL6         | 5.368 | 0           |
| TEX54        | 5.341 | 0.018535949 |
| FDPS         | 5.324 | 0           |
| HCN3         | 5.300 | 0           |
| RHBDF1       | 5.294 | 2.22E-16    |
| C22ORF24     | 5.290 | 0.006885408 |
| TRIM11       | 5.282 | 0           |
| SS18L2       | 5.265 | 0           |
| WFIKKN1      | 5.246 | 0           |
| RASSF1       | 5.228 | 0           |

|             |       |             |
|-------------|-------|-------------|
| CDKN2D      | 5.228 | 0           |
| PIM3        | 5.227 | 0           |
| ZFP36       | 5.224 | 0           |
| ARC         | 5.208 | 0           |
| FAM72C      | 5.189 | 0           |
| EVPL        | 5.176 | 0.008553536 |
| PIM2        | 5.166 | 0           |
| LRP5L       | 5.166 | 0           |
| SPOCD1      | 5.166 | 0.000860432 |
| BLVRB       | 5.157 | 0           |
| MAP1LC3A    | 5.145 | 0           |
| CEP295NL    | 5.143 | 1.55E-05    |
| C4ORF54     | 5.122 | 0.007873492 |
| C6ORF223    | 5.108 | 6.74E-11    |
| MDK         | 5.094 | 0           |
| LINC00957   | 5.088 | 7.44E-14    |
| PHF1        | 5.078 | 0           |
| GPX3        | 5.070 | 0           |
| PNPLA3      | 5.068 | 0           |
| ZNF296      | 5.043 | 4.16E-06    |
| SYNGR3      | 5.040 | 0           |
| SBSN        | 5.037 | 0.041586624 |
| RPRM        | 5.022 | 0.000446893 |
| PRR36       | 5.020 | 0           |
| FERP1       | 5.017 | 0.000582669 |
| NPPC        | 5.002 | 4.08E-08    |
| RASA4DP     | 4.999 | 2.67E-05    |
| RAB26       | 4.987 | 0           |
| SNORA73B    | 4.987 | 0.004712255 |
| ADORA2A     | 4.986 | 0           |
| FADS3       | 4.986 | 0           |
| PCDHA5      | 4.971 | 0           |
| PLAU        | 4.967 | 0           |
| CAMK2N1     | 4.955 | 0           |
| STRC        | 4.942 | 0.004095873 |
| MYO5B       | 4.938 | 0           |
| MIR4435-2HG | 4.918 | 0           |
| UPP1        | 4.902 | 0           |
| SH3GL1P2    | 4.896 | 0.039055307 |
| SPATA31A6   | 4.891 | 0.049792538 |
| CYTOR       | 4.884 | 0           |
| SLC17A7     | 4.882 | 0           |
| EFNA3       | 4.869 | 0           |
| CACTIN-AS1  | 4.855 | 2.21E-13    |
| TNFAIP2     | 4.846 | 0           |

|           |       |             |
|-----------|-------|-------------|
| KCNG2     | 4.824 | 1.79E-06    |
| CCNL1     | 4.821 | 0           |
| PPP1R37   | 4.787 | 0           |
| TSHZ3     | 4.783 | 0.033330568 |
| DNAJA4    | 4.754 | 0           |
| STX1A     | 4.748 | 0           |
| PTGS1     | 4.742 | 0.000131594 |
| ZNF460    | 4.741 | 0           |
| CR1       | 4.738 | 0.023315168 |
| GNA13     | 4.735 | 0           |
| PLA2G16   | 4.722 | 0           |
| DLG4      | 4.718 | 0           |
| DENND3    | 4.717 | 2.90E-05    |
| CORO6     | 4.709 | 0           |
| MTMR11    | 4.705 | 0           |
| EBLN2     | 4.697 | 7.21E-09    |
| MNT       | 4.696 | 0           |
| NPIP6     | 4.693 | 0.000262984 |
| DUSP10    | 4.692 | 0           |
| PGGHG     | 4.691 | 0           |
| ZEB2-AS1  | 4.669 | 0.031917041 |
| RPPH1     | 4.668 | 8.10E-07    |
| PRG4      | 4.660 | 0.001043941 |
| SPON2     | 4.653 | 1.37E-07    |
| KREMEN2   | 4.647 | 0           |
| CATSPERG  | 4.645 | 0.000279804 |
| TDRKH-AS1 | 4.638 | 0           |
| NPC2      | 4.623 | 0           |
| PPP1R14C  | 4.622 | 0           |
| ENTHD1    | 4.575 | 9.51E-06    |
| PALM3     | 4.570 | 0           |
| ANKRD1    | 4.566 | 0.046007916 |
| PDGFRB    | 4.562 | 0.000851061 |
| LINC00115 | 4.560 | 7.01E-09    |
| GP6       | 4.559 | 0.018216693 |
| SLC25A29  | 4.558 | 0           |
| ANGPT2    | 4.555 | 0.034679191 |
| INPP5J    | 4.553 | 0           |
| PI4K2A    | 4.549 | 0           |
| RSRC2     | 4.547 | 0           |
| BCL2L1    | 4.540 | 0           |
| HSPA6     | 4.537 | 0.010234969 |
| SPSB1     | 4.531 | 1.47E-11    |
| ACBD3     | 4.529 | 0           |
| RPS26P15  | 4.528 | 0.00391404  |

|          |       |             |
|----------|-------|-------------|
| ITGA3    | 4.521 | 0           |
| URAHF    | 4.517 | 1.51E-07    |
| RAB33A   | 4.513 | 0           |
| CDKN1C   | 4.509 | 0           |
| SQSTM1   | 4.500 | 0           |
| U2AF1L4  | 4.499 | 0           |
| RN7SL81P | 4.490 | 0.045964979 |
| KDEL3    | 4.486 | 0           |
| AVPI1    | 4.479 | 0           |
| KLF4     | 4.477 | 0           |
| AOC3     | 4.465 | 1.77E-11    |
| HSPA5    | 4.462 | 0           |
| OPTN     | 4.447 | 0           |
| SEC24D   | 4.426 | 0           |
| NPIP3    | 4.426 | 0           |
| CYP2T1P  | 4.417 | 7.06E-06    |
| N4BP2L1  | 4.412 | 0           |
| HERPUD1  | 4.400 | 0           |
| WNT9A    | 4.384 | 1.11E-16    |
| ANKDD1A  | 4.384 | 0           |
| DHCR24   | 4.383 | 0           |
| ASS1     | 4.383 | 0           |
| LUM      | 4.380 | 6.47E-09    |
| CTAGE8   | 4.377 | 0.030209538 |
| DDAH2    | 4.370 | 0           |
| PCYT2    | 4.361 | 0           |
| BPMS     | 4.360 | 0           |
| DLX2     | 4.358 | 0           |
| TMEM91   | 4.355 | 0.000213076 |
| ACSL6    | 4.355 | 1.11E-16    |
| RASA4B   | 4.354 | 0           |
| DSPP     | 4.352 | 0.004515965 |
| CIITA    | 4.348 | 0           |
| NPIP2    | 4.332 | 5.37E-07    |
| KRT8P46  | 4.319 | 1.88E-08    |
| YPEL3    | 4.317 | 5.03E-10    |
| ITGA10   | 4.309 | 0           |
| UBC      | 4.296 | 0           |
| DUSP5    | 4.292 | 0           |
| SNORA71B | 4.290 | 0.007836515 |
| CD44     | 4.287 | 0           |
| IRF7     | 4.268 | 0           |
| PEA15    | 4.259 | 0           |
| FAT3     | 4.257 | 0.019660229 |
| PPP3CC   | 4.245 | 0           |



|            |       |             |
|------------|-------|-------------|
| TPM2       | 4.242 | 1.44E-12    |
| GOLGA2     | 4.242 | 0           |
| RNF112     | 4.236 | 1.52E-14    |
| ECEL1      | 4.236 | 1.74E-06    |
| G6PD       | 4.229 | 0           |
| NPIPA5     | 4.223 | 0.003152845 |
| ICAM5      | 4.217 | 0           |
| SNHG12     | 4.202 | 0           |
| LGALS3     | 4.194 | 0           |
| PHF24      | 4.189 | 2.24E-10    |
| CNIH3      | 4.187 | 1.11E-16    |
| POFUT2     | 4.183 | 0           |
| GAD1       | 4.183 | 0           |
| SCML1      | 4.182 | 0           |
| SLC25A25   | 4.179 | 0           |
| MSANTD3    | 4.175 | 0           |
| TTC9B      | 4.170 | 4.10E-07    |
| SEMA3F-AS1 | 4.169 | 0.000776526 |
| DEPP1      | 4.165 | 1.22E-15    |
| INAFM1     | 4.160 | 0           |
| PTPRU      | 4.153 | 1.10E-14    |
| ACSL1      | 4.147 | 0           |
| CYP2E1     | 4.144 | 0.002089435 |
| ALDOC      | 4.143 | 0           |
| ARMCX1     | 4.134 | 0           |
| LPCAT4     | 4.121 | 0           |
| GRAMD1B    | 4.114 | 0.002569689 |
| SLC7A5P1   | 4.113 | 0           |
| PLEKHF1    | 4.113 | 0           |
| MAGED4     | 4.110 | 0           |
| MYO18B     | 4.108 | 0.04406542  |
| PRF1       | 4.107 | 0.045854408 |
| PVT1       | 4.103 | 0           |
| KLHL21     | 4.083 | 0           |
| KLHL24     | 4.081 | 0           |
| DNAJC2     | 4.079 | 0           |
| PDIA2      | 4.071 | 1.93E-07    |
| SRRM5      | 4.064 | 2.02E-07    |
| HDAC10     | 4.054 | 2.19E-09    |
| PI4KAP1    | 4.052 | 8.88E-16    |
| ATP6V1B1   | 4.050 | 0           |
| RFPL3S     | 4.049 | 6.62E-05    |
| EGF        | 4.046 | 1.93E-11    |
| JAKMIP3    | 4.042 | 0.001799807 |
| TRIP10     | 4.040 | 0           |

|            |       |             |
|------------|-------|-------------|
| IDUA       | 4.031 | 0           |
| RASGEF1B   | 4.031 | 4.15E-09    |
| ZNF57      | 4.025 | 0           |
| ITPR3      | 4.020 | 0           |
| AEBP1      | 4.004 | 0           |
| TMEM59L    | 3.996 | 0.000748499 |
| CLK3       | 3.993 | 0           |
| LRCH4      | 3.991 | 0           |
| HIST2H2AA3 | 3.987 | 4.61E-05    |
| WBP2       | 3.968 | 0           |
| MEF2D      | 3.968 | 0           |
| FOSL1      | 3.965 | 0           |
| CYSTM1     | 3.952 | 0           |
| SLC2A3     | 3.951 | 0           |
| PRICKLE2   | 3.947 | 2.01E-14    |
| FASN       | 3.945 | 0           |
| HSPB1      | 3.944 | 0.017433057 |
| ELOVL5     | 3.940 | 0           |
| CDKN1B     | 3.939 | 0           |
| CGAS       | 3.936 | 0           |
| HNRNPL     | 3.927 | 0           |
| TAF1D      | 3.926 | 0           |
| KLHL15     | 3.926 | 0           |
| CCDC116    | 3.908 | 0.041474557 |
| CKS1B      | 3.900 | 0           |
| RCN3       | 3.900 | 0           |
| HSPB1P1    | 3.899 | 0.018803089 |
| TEAD3      | 3.898 | 0           |
| RPL22L1    | 3.897 | 0           |
| RAD9A      | 3.897 | 0           |
| CALML4     | 3.892 | 0           |
| GFOD1      | 3.884 | 0           |
| LGALS9     | 3.883 | 8.79E-09    |
| CCNB1IP1   | 3.873 | 0           |
| TFAP2E     | 3.873 | 0.001931927 |
| AKAP17A    | 3.869 | 0           |
| AKAP17A    | 3.869 | 0           |
| FOXO3      | 3.865 | 0           |
| KLF9       | 3.857 | 0           |
| SPATA31C2  | 3.851 | 0.031656122 |
| TDRP       | 3.848 | 5.21E-07    |
| RNF168     | 3.846 | 0           |
| SMIM29     | 3.844 | 0           |
| DNM1       | 3.840 | 0           |
| TMEM120A   | 3.839 | 0           |

|          |       |             |
|----------|-------|-------------|
| ZRSR2    | 3.834 | 0           |
| CDK20    | 3.832 | 0           |
| OTULINL  | 3.820 | 0           |
| LARP6    | 3.817 | 0           |
| STAT5A   | 3.807 | 0           |
| TBC1D17  | 3.803 | 0           |
| TMEM231  | 3.802 | 0           |
| DPF1     | 3.799 | 0           |
| CLSTN3   | 3.798 | 0           |
| DGCR6    | 3.797 | 0           |
| ARHGAP33 | 3.797 | 0           |
| SH3BP5   | 3.796 | 0           |
| NFKBIB   | 3.795 | 0           |
| EIF1P7   | 3.793 | 1.16E-06    |
| NPC1     | 3.785 | 0           |
| DEDD2    | 3.784 | 0           |
| TMEM171  | 3.784 | 0.00011455  |
| GRIN2D   | 3.773 | 0.014366756 |
| SEMA7A   | 3.772 | 0           |
| BCAM     | 3.770 | 1.10E-13    |
| ACSL3    | 3.767 | 0           |
| AATBC    | 3.762 | 0.006575107 |
| MEX3B    | 3.761 | 0           |
| LYPD1    | 3.756 | 3.55E-08    |
| FTH1P4   | 3.756 | 4.17E-11    |
| NKTR     | 3.755 | 0           |
| UBTD1    | 3.754 | 0           |
| TUFT1    | 3.744 | 0           |
| FAM72D   | 3.737 | 0           |
| NPAS2    | 3.736 | 0           |
| ZNF622   | 3.735 | 0           |
| NPIPA3   | 3.734 | 5.82E-11    |
| WDR87    | 3.732 | 0.01518321  |
| DUSP2    | 3.731 | 0.002253825 |
| HIST1H3B | 3.727 | 0.001736463 |
| IFRD1    | 3.725 | 0           |
| UHRF2    | 3.724 | 0           |
| SRPX     | 3.723 | 0           |
| MLXIPL   | 3.723 | 8.31E-07    |
| SPIN2A   | 3.717 | 1.92E-05    |
| FAM193B  | 3.716 | 0           |
| EIF4A2   | 3.712 | 0           |
| LTK      | 3.711 | 0.017122299 |
| ZBTB43   | 3.705 | 0           |
| HIST1H1C | 3.702 | 2.17E-10    |

|           |       |             |
|-----------|-------|-------------|
| LYST      | 3.693 | 0           |
| MTRNR2L12 | 3.689 | 0           |
| UBALD2    | 3.684 | 0           |
| SAT2      | 3.680 | 0           |
| FAM189B   | 3.679 | 0           |
| DAPK3     | 3.677 | 0           |
| GOLGA4    | 3.677 | 0           |
| C1S       | 3.672 | 3.62E-06    |
| TUBB2BP1  | 3.669 | 0           |
| TUBB2B    | 3.663 | 0           |
| SHB       | 3.657 | 0           |
| GPR85     | 3.645 | 0           |
| LATS2     | 3.638 | 0           |
| RRAGD     | 3.638 | 0           |
| IL6R      | 3.629 | 1.11E-16    |
| ARAP1-AS2 | 3.628 | 0.000558029 |
| LBX1      | 3.627 | 0.010019988 |
| LRRC17    | 3.623 | 1.31E-08    |
| RAB3A     | 3.622 | 0           |
| TBC1D10A  | 3.616 | 0           |
| CCDC168   | 3.609 | 0.00394883  |
| HLA-B     | 3.607 | 0           |
| MMP14     | 3.600 | 0           |
| TNC       | 3.599 | 0           |
| SVEP1     | 3.593 | 0.012638667 |
| GCNT4     | 3.590 | 0.004118397 |
| ATP1A3    | 3.587 | 0           |
| PCA3      | 3.586 | 0           |
| PHACTR2P1 | 3.582 | 0.021045662 |
| JUN       | 3.572 | 0           |
| SYNGAP1   | 3.565 | 0           |
| BTG3      | 3.563 | 0           |
| LENG8     | 3.552 | 1.16E-10    |
| SLC4A8    | 3.551 | 1.39E-10    |
| HVCN1     | 3.546 | 0.01304524  |
| PCDH1     | 3.542 | 0           |
| PLEKHA7   | 3.538 | 0           |
| PATJ      | 3.536 | 0           |
| ZFAND2A   | 3.535 | 0           |
| GADD45A   | 3.534 | 0           |
| LBHD1     | 3.534 | 1.78E-12    |
| ZYX       | 3.531 | 0           |
| STARD8    | 3.530 | 3.37E-09    |
| PCDHB4    | 3.530 | 0.026332811 |
| MAP1LC3B2 | 3.529 | 6.79E-10    |

|            |       |             |
|------------|-------|-------------|
| IGFBP3     | 3.526 | 0           |
| RNF169     | 3.525 | 0           |
| C6ORF48    | 3.517 | 0           |
| JMJD6      | 3.502 | 0           |
| EMP3       | 3.496 | 0           |
| ZC3H12A    | 3.495 | 0           |
| CYP2D6     | 3.483 | 0.000649786 |
| PCGF1      | 3.483 | 0           |
| MED15      | 3.479 | 0           |
| MAPK8IP1P2 | 3.478 | 0.04430847  |
| DUSP14     | 3.471 | 0           |
| LINC01578  | 3.471 | 0           |
| CASQ1      | 3.468 | 0.008538327 |
| HRK        | 3.467 | 0           |
| CEBPB      | 3.462 | 0           |
| RPS26P13   | 3.457 | 0.032467459 |
| SMTN       | 3.457 | 0           |
| SPTBN4     | 3.454 | 2.19E-09    |
| GAS5       | 3.449 | 0           |
| RABGGTB    | 3.445 | 0           |
| ABHD17AP3  | 3.443 | 0.017239877 |
| C1ORF174   | 3.442 | 0           |
| GABBR1     | 3.441 | 0           |
| DDN        | 3.439 | 0           |
| CDK5RAP3   | 3.439 | 1.46E-09    |
| NPIP12     | 3.438 | 3.22E-09    |
| ANKRD20A3  | 3.436 | 5.55E-16    |
| KLHL17     | 3.436 | 0           |
| MID1IP1    | 3.430 | 0           |
| CLIC1      | 3.427 | 0           |
| SERTAD1    | 3.426 | 0           |
| BGN        | 3.417 | 0           |
| ISYNA1     | 3.407 | 0           |
| CDK2AP2    | 3.407 | 0           |
| RASA4      | 3.407 | 0           |
| RIN1       | 3.405 | 0           |
| ZBTB10     | 3.398 | 0           |
| E4F1       | 3.397 | 0           |
| HABP4      | 3.396 | 0           |
| C1ORF54    | 3.394 | 7.15E-07    |
| SPATC1L    | 3.392 | 0           |
| NPIP5      | 3.392 | 0           |
| FTH1P20    | 3.392 | 0           |
| VASH2      | 3.389 | 0           |
| PAMR1      | 3.389 | 0           |

|          |       |             |
|----------|-------|-------------|
| EMD      | 3.381 | 0           |
| NR3C2    | 3.378 | 3.56E-12    |
| P4HA2    | 3.359 | 0           |
| HYPK     | 3.358 | 0.000144932 |
| GDI1     | 3.358 | 0           |
| NEK2     | 3.354 | 0           |
| IFI30    | 3.354 | 6.08E-09    |
| UAP1L1   | 3.354 | 0           |
| LSS      | 3.351 | 0           |
| NEAT1    | 3.348 | 0.001227935 |
| TBX2     | 3.346 | 0           |
| CACNB1   | 3.345 | 0           |
| LIN7B    | 3.336 | 0           |
| NTAN1    | 3.335 | 0           |
| BNIP1    | 3.332 | 0           |
| SMG1P2   | 3.332 | 0           |
| MCF2L    | 3.331 | 0           |
| GOLT1B   | 3.331 | 0           |
| HOXB2    | 3.329 | 0.013495855 |
| NPIP15   | 3.321 | 1.11E-16    |
| FTH1P16  | 3.317 | 2.21E-13    |
| TMUB1    | 3.317 | 0           |
| GAB2     | 3.312 | 0           |
| RNASE4   | 3.309 | 7.38E-13    |
| PHF21B   | 3.306 | 0           |
| SMG1P4   | 3.304 | 0           |
| DBF4P1   | 3.301 | 2.88E-05    |
| HNRNPLP2 | 3.300 | 0           |
| PIIF     | 3.299 | 0           |
| UNC5B    | 3.299 | 2.67E-11    |
| RAB33B   | 3.298 | 0           |
| PDP2     | 3.297 | 0           |
| ZNF579   | 3.297 | 0           |
| TIPARP   | 3.289 | 0           |
| ANKZF1   | 3.285 | 0           |
| CLASRP   | 3.285 | 0           |
| KMT5C    | 3.284 | 0           |
| TCEAL9   | 3.283 | 6.66E-16    |
| SPSB3    | 3.280 | 0           |
| MT-RNR2  | 3.280 | 0           |
| FUT1     | 3.279 | 2.08E-13    |
| NPIP13   | 3.278 | 0.000194206 |
| ISG20    | 3.277 | 1.61E-07    |
| RUSC1    | 3.276 | 0           |
| PRODH    | 3.275 | 1.98E-06    |

|          |       |             |
|----------|-------|-------------|
| SNRPA1   | 3.274 | 0           |
| JUNB     | 3.272 | 0           |
| MTRNR2L8 | 3.268 | 0           |
| PMM1     | 3.267 | 0           |
| PITPNM2  | 3.264 | 0           |
| TRPM4    | 3.263 | 0           |
| DKK3     | 3.262 | 2.22E-16    |
| ARMCX4   | 3.262 | 0           |
| SHC2     | 3.258 | 0           |
| ZNF841   | 3.255 | 0           |
| TFE3     | 3.253 | 0           |
| EIF1     | 3.252 | 0           |
| FLVCR1   | 3.251 | 0           |
| NRXN2    | 3.249 | 4.67E-13    |
| SRRM3    | 3.248 | 1.54E-13    |
| PLPP5    | 3.245 | 0           |
| EML2     | 3.243 | 0           |
| NEURL1B  | 3.242 | 6.94E-10    |
| RSRP1    | 3.240 | 0           |
| MEIOC    | 3.237 | 0.003557983 |
| ATP6AP1  | 3.237 | 0           |
| ANXA2    | 3.236 | 0           |
| PIK3CD   | 3.235 | 0           |
| BCL2     | 3.235 | 0           |
| NPIPA2   | 3.233 | 0.042133855 |
| TTC39B   | 3.223 | 0           |
| GFPT1    | 3.217 | 0           |
| FBXO31   | 3.216 | 0           |
| SRF      | 3.214 | 0           |
| C1ORF198 | 3.214 | 0           |
| MTCO1P40 | 3.210 | 1.74E-09    |
| FTH1P12  | 3.209 | 0           |
| TIMM10B  | 3.208 | 0           |
| CEACAM19 | 3.207 | 2.79E-11    |
| PAX6     | 3.206 | 0           |
| EMP1     | 3.201 | 0           |
| ABI1     | 3.195 | 0           |
| OSGEP    | 3.194 | 1.31E-10    |
| FSD1L    | 3.194 | 0           |
| DYRK3    | 3.188 | 0           |
| CPZ      | 3.186 | 0           |
| NPM1P26  | 3.186 | 0.001296489 |
| ACTG1    | 3.176 | 0           |
| KDM7A    | 3.174 | 0           |
| AKAP8L   | 3.171 | 0           |

|          |       |             |
|----------|-------|-------------|
| ARHGEF3  | 3.171 | 0           |
| GLUL     | 3.165 | 0           |
| SNHG16   | 3.160 | 0           |
| AURKB    | 3.151 | 0           |
| C2ORF69  | 3.145 | 0           |
| FHL2     | 3.144 | 0           |
| NTN5     | 3.142 | 1.51E-06    |
| CIB2     | 3.142 | 0           |
| CBX4     | 3.141 | 0           |
| SV2A     | 3.132 | 0           |
| METRNL   | 3.132 | 0           |
| TFEB     | 3.129 | 0           |
| SEC13    | 3.128 | 0           |
| YPEL2    | 3.128 | 0           |
| RELB     | 3.128 | 0           |
| OSBP2    | 3.127 | 0.002363398 |
| MVP      | 3.122 | 0           |
| CRABP2   | 3.111 | 0.000691486 |
| LSMEM1   | 3.111 | 2.45E-06    |
| EIF4A2P4 | 3.110 | 0.045081332 |
| SLC3A2   | 3.105 | 0           |
| HMOX1    | 3.102 | 0           |
| CARD19   | 3.099 | 0           |
| BRICD5   | 3.097 | 7.77E-16    |
| MEGF11   | 3.096 | 0           |
| TMBIM1   | 3.095 | 0           |
| WDSUB1   | 3.095 | 0           |
| DDIT4    | 3.092 | 0           |
| KLHL11   | 3.088 | 0           |
| HAPLN3   | 3.087 | 8.01E-13    |
| TUBB2A   | 3.084 | 0           |
| ZFPL1    | 3.082 | 0           |
| RAB40C   | 3.081 | 0           |
| RILPL1   | 3.081 | 0           |
| KCND1    | 3.080 | 7.99E-06    |
| TFRC     | 3.078 | 0           |
| PLA2G4B  | 3.072 | 1.09E-08    |
| FABP5P11 | 3.070 | 5.33E-15    |
| FNIP1    | 3.064 | 0           |
| SNHG15   | 3.061 | 1.31E-08    |
| EVA1B    | 3.058 | 5.84E-06    |
| DDX39A   | 3.056 | 0           |
| ASPSCR1  | 3.049 | 0           |
| MPP3     | 3.045 | 3.28E-07    |
| NPIP4    | 3.043 | 0           |



|           |       |             |
|-----------|-------|-------------|
| YIPF2     | 3.030 | 0           |
| SLC12A4   | 3.026 | 0           |
| EBF4      | 3.025 | 0           |
| NPIPA1    | 3.025 | 0           |
| ITGAX     | 3.021 | 6.88E-05    |
| SERTAD3   | 3.021 | 0           |
| FTH1P7    | 3.020 | 0           |
| MED26     | 3.019 | 0           |
| PQBP1     | 3.019 | 0           |
| C16ORF45  | 3.016 | 0           |
| LPAR2     | 3.014 | 0           |
| GJC1      | 3.013 | 0           |
| SPATA20   | 3.010 | 3.66E-15    |
| MARK4     | 3.003 | 0           |
| FTH1P8    | 2.999 | 0           |
| PKD1P6    | 2.992 | 0           |
| RARRES2   | 2.990 | 0.009096898 |
| HBP1      | 2.990 | 0           |
| FTH1      | 2.987 | 0           |
| DHRS3     | 2.985 | 0.008524203 |
| NDEL1     | 2.984 | 0           |
| CALU      | 2.984 | 0           |
| FTH1P11   | 2.983 | 0           |
| RHOA      | 2.983 | 0           |
| BAZ2A     | 2.980 | 0           |
| HIST1H2BJ | 2.980 | 3.64E-08    |
| HID1      | 2.976 | 0.000135966 |
| ARHGAP24  | 2.975 | 0           |
| PLXNA3    | 2.972 | 2.31E-12    |
| SLC19A2   | 2.968 | 0           |
| NOV       | 2.968 | 0           |
| C1QTNF5   | 2.968 | 0           |
| UBE2SP1   | 2.965 | 0           |
| SNHG6     | 2.960 | 0           |
| SLC45A3   | 2.958 | 0           |
| PDP1      | 2.958 | 2.11E-15    |
| MED8      | 2.957 | 0           |
| HECA      | 2.957 | 0           |
| POU2F1    | 2.956 | 0           |
| WIP1      | 2.953 | 0           |
| FTH1P10   | 2.952 | 0           |
| HIST1H2BH | 2.950 | 2.34E-05    |
| RND2      | 2.941 | 0           |
| KAT5      | 2.938 | 0           |
| GNRH1     | 2.938 | 0.003004341 |

|           |       |             |
|-----------|-------|-------------|
| MAP1LC3B  | 2.938 | 0           |
| C7ORF61   | 2.935 | 2.22E-06    |
| COMMD7    | 2.932 | 0           |
| FTH1P2    | 2.930 | 0           |
| FAM157C   | 2.925 | 7.89E-06    |
| CSRNP1    | 2.923 | 0           |
| PWWP2B    | 2.921 | 0           |
| RGPD1     | 2.920 | 5.55E-16    |
| SYF2      | 2.914 | 0           |
| KRT10     | 2.913 | 0           |
| ZFAS1     | 2.913 | 0           |
| ARF1      | 2.913 | 0           |
| GLIS2     | 2.910 | 0           |
| STX3      | 2.907 | 0           |
| NCK1      | 2.904 | 0           |
| GTF2IRD1  | 2.904 | 0           |
| NXT1      | 2.903 | 0           |
| FHIT      | 2.902 | 1.24E-07    |
| PNPLA2    | 2.900 | 0           |
| ADAMTSL5  | 2.899 | 0           |
| PANK3     | 2.898 | 0           |
| ITGA2B    | 2.897 | 0.000824821 |
| NPTN-IT1  | 2.895 | 1.41E-10    |
| KMT2E-AS1 | 2.892 | 0.000860015 |
| FBXO32    | 2.892 | 0           |
| FXYD5     | 2.891 | 0           |
| AQP4      | 2.889 | 2.51E-08    |
| YJU2      | 2.888 | 0           |
| MT-RNR1   | 2.883 | 0           |
| SRRM1     | 2.881 | 0           |
| CPEB4     | 2.881 | 0           |
| FTH1P23   | 2.879 | 0           |
| CDC42EP5  | 2.878 | 0           |
| ACTBP2    | 2.877 | 0.00342129  |
| MAFG      | 2.877 | 0           |
| FNBP4     | 2.872 | 0           |
| TSEN34    | 2.872 | 0           |
| MEG8      | 2.872 | 0.000227817 |
| ADPRM     | 2.869 | 0           |
| CCNG1     | 2.867 | 0           |
| CNN2      | 2.866 | 0           |
| SLC15A2   | 2.864 | 1.41E-05    |
| SLC30A1   | 2.864 | 0           |
| RHBDL1    | 2.864 | 1.16E-05    |
| TRIB3     | 2.863 | 0           |

|           |       |             |
|-----------|-------|-------------|
| CLIP2     | 2.861 | 0           |
| COPB1     | 2.860 | 0           |
| TMEM214   | 2.857 | 0           |
| PI4KAP2   | 2.854 | 0           |
| ITGA5     | 2.853 | 0           |
| TRIM3     | 2.852 | 8.12E-13    |
| AGAP6     | 2.851 | 3.03E-14    |
| BRI3      | 2.850 | 0           |
| TKT       | 2.847 | 0           |
| TBC1D3D   | 2.847 | 5.81E-12    |
| HNRNPDL   | 2.847 | 0           |
| BRSK1     | 2.846 | 0           |
| TMEM135   | 2.845 | 0           |
| ZNF143    | 2.840 | 0           |
| TMCC2     | 2.838 | 0           |
| ZNF529    | 2.837 | 0           |
| DCAF15    | 2.836 | 0           |
| RFNG      | 2.831 | 0           |
| ATF4      | 2.830 | 0           |
| IRF2BP2   | 2.829 | 0           |
| MTND4P12  | 2.827 | 4.44E-16    |
| AMT       | 2.826 | 5.39E-10    |
| SP1       | 2.824 | 0           |
| PGD       | 2.823 | 0           |
| FAM72B    | 2.819 | 0           |
| CCDC107   | 2.818 | 0           |
| PAK1      | 2.817 | 5.26E-06    |
| ATF4P3    | 2.816 | 0           |
| OSBP      | 2.814 | 0           |
| FABP5P7   | 2.814 | 0           |
| UBE2S     | 2.812 | 0           |
| RAB11FIP5 | 2.811 | 0           |
| MAP1B     | 2.809 | 0           |
| ZBTB7B    | 2.805 | 0           |
| MYO15B    | 2.803 | 9.63E-05    |
| FAM131A   | 2.802 | 0           |
| ANO10     | 2.800 | 0           |
| MUC5B     | 2.799 | 0.016734377 |
| C6ORF136  | 2.791 | 0           |
| SNHG17    | 2.791 | 0           |
| HSF1      | 2.789 | 0           |
| CAMK2D    | 2.788 | 0           |
| SLC27A1   | 2.788 | 0           |
| TBC1D15   | 2.787 | 0           |
| CCSER2    | 2.786 | 0           |

|             |       |             |
|-------------|-------|-------------|
| CFDP1       | 2.783 | 0           |
| HIST1H2AE   | 2.782 | 0.007895175 |
| DEXI        | 2.779 | 0           |
| TXNDC16     | 2.778 | 0           |
| NPIP11      | 2.777 | 0.000259832 |
| CRY2        | 2.774 | 0           |
| PHF13       | 2.774 | 0           |
| PPM1A       | 2.770 | 0           |
| PGP         | 2.769 | 0           |
| PQLC1       | 2.768 | 0           |
| ATF4P4      | 2.767 | 2.22E-13    |
| LONRF1      | 2.764 | 7.18E-14    |
| CUTA        | 2.761 | 6.64E-09    |
| DUSP3       | 2.760 | 0           |
| PHF3        | 2.758 | 0           |
| BHLHE40     | 2.758 | 0           |
| PDXDC1      | 2.757 | 0           |
| TPPP        | 2.755 | 0           |
| GDPD3       | 2.753 | 1.70E-05    |
| SLCO4A1-AS1 | 2.752 | 0           |
| JAG2        | 2.750 | 0           |
| CACNG1      | 2.749 | 0.003140468 |
| ING2        | 2.748 | 0           |
| RINT1       | 2.748 | 0           |
| HLA-E       | 2.747 | 0           |
| HJURP       | 2.746 | 0           |
| UVRAG       | 2.744 | 0           |
| CEP85       | 2.744 | 0           |
| FAM72A      | 2.742 | 0           |
| IRAK2       | 2.741 | 0           |
| ROBO3       | 2.741 | 2.94E-06    |
| NPTX1       | 2.738 | 0           |
| ZBTB5       | 2.738 | 0           |
| PMP22       | 2.738 | 0           |
| SUPT5H      | 2.733 | 0           |
| ELOVL6      | 2.730 | 0           |
| TIMM17A     | 2.729 | 0           |
| KLF3-AS1    | 2.727 | 1.10E-05    |
| OSGIN1      | 2.725 | 0           |
| SBDSP1      | 2.721 | 0           |
| FABP5       | 2.720 | 0           |
| FABP5P1     | 2.719 | 0           |
| HLA-DMA     | 2.719 | 2.80E-07    |
| PTOV1-AS2   | 2.718 | 6.40E-12    |
| AMN         | 2.715 | 2.64E-06    |

|            |       |             |
|------------|-------|-------------|
| H3F3C      | 2.713 | 3.85E-05    |
| RBM14-RBM4 | 2.709 | 0           |
| ANKRD10    | 2.707 | 0           |
| SLC25A1    | 2.706 | 0           |
| ANKRD13D   | 2.705 | 0           |
| ATXN2L     | 2.704 | 0           |
| RLIM       | 2.697 | 0           |
| RPSAP47    | 2.696 | 0.016441332 |
| SEC31A     | 2.695 | 0           |
| DNAJC3     | 2.695 | 0           |
| ANO8       | 2.692 | 0           |
| PSAP       | 2.691 | 0           |
| BTG1       | 2.690 | 0           |
| ODF2       | 2.689 | 0           |
| UBXN7      | 2.689 | 0           |
| RRAS       | 2.686 | 0           |
| ITGB4      | 2.685 | 0           |
| IFITM2     | 2.682 | 0           |
| TUBB3      | 2.680 | 0           |
| MPC1       | 2.680 | 0           |
| BCAS4      | 2.678 | 0           |
| MOCOS      | 2.676 | 0.046294278 |
| CARMIL3    | 2.676 | 1.37E-09    |
| TESK2      | 2.676 | 0           |
| NECTIN2    | 2.673 | 0           |
| AGAP12P    | 2.672 | 0.005564849 |
| RPL23AP65  | 2.672 | 7.83E-08    |
| RNF5P1     | 2.670 | 2.88E-11    |
| WDYHV1     | 2.670 | 0           |
| GKAP1      | 2.662 | 0           |
| NR1D2      | 2.661 | 1.01E-12    |
| NPIPP1     | 2.657 | 9.77E-15    |
| MSL2       | 2.657 | 0           |
| EAF2       | 2.656 | 0.0339967   |
| THBS2      | 2.655 | 0           |
| POPDC3     | 2.653 | 0           |
| CIR1       | 2.653 | 0           |
| CNNM2      | 2.652 | 0           |
| MFSD14A    | 2.652 | 0           |
| CSPG4P10   | 2.651 | 0           |
| KSR1       | 2.646 | 0           |
| VEGFA      | 2.645 | 0           |
| ERP29      | 2.642 | 0           |
| PRSS53     | 2.639 | 0.000785946 |
| STK17A     | 2.637 | 0           |

|               |       |             |
|---------------|-------|-------------|
| LINC00894     | 2.635 | 0.000117819 |
| MAST1         | 2.632 | 0           |
| FADS2         | 2.631 | 0           |
| ANKHD1        | 2.629 | 0           |
| CRY1          | 2.625 | 0           |
| USP6          | 2.624 | 0.000423998 |
| SMG1P5        | 2.623 | 0           |
| STX4          | 2.621 | 0           |
| RGS10         | 2.617 | 0           |
| PLA2G15       | 2.617 | 0           |
| SAE1          | 2.615 | 0           |
| ST20-MTHFS    | 2.613 | 0.000948245 |
| ARG2          | 2.613 | 0           |
| CAMKK1        | 2.612 | 0           |
| BCL3          | 2.611 | 0           |
| FBXO6         | 2.609 | 1.64E-06    |
| NRDC          | 2.609 | 0           |
| PPP1R15B      | 2.608 | 0           |
| ANKRD61       | 2.608 | 0.000759705 |
| PDLIM4        | 2.607 | 0           |
| ACSL4         | 2.607 | 0           |
| PLAC9         | 2.606 | 0           |
| TMEM259       | 2.603 | 0           |
| SMPDL3A       | 2.601 | 1.11E-16    |
| ATF7          | 2.599 | 0           |
| SIAH1         | 2.598 | 0           |
| RCE1          | 2.596 | 0           |
| SNHG1         | 2.595 | 4.74E-13    |
| ALAS1         | 2.595 | 0           |
| USP32         | 2.594 | 0           |
| FAM50A        | 2.594 | 0           |
| YWHAZP3       | 2.593 | 5.32E-06    |
| SLC29A2       | 2.590 | 0           |
| TMEM167B      | 2.589 | 0           |
| IFITM3        | 2.588 | 0           |
| HOXC10        | 2.585 | 0           |
| PROS1         | 2.583 | 0           |
| DNHD1         | 2.581 | 9.43E-06    |
| NPIP14P       | 2.579 | 8.83E-10    |
| GMPPA         | 2.579 | 0           |
| MPV17L2       | 2.578 | 0           |
| JMJD7-PLA2G4B | 2.578 | 1.82E-10    |
| PCDHGB1       | 2.576 | 0.040083111 |
| HBEGF         | 2.576 | 0           |
| ACTB          | 2.573 | 0           |

|           |       |             |
|-----------|-------|-------------|
| DBF4      | 2.573 | 0           |
| NRBP1     | 2.571 | 0           |
| SCART1    | 2.569 | 9.18E-10    |
| CREB3L1   | 2.567 | 3.87E-09    |
| RPL23AP43 | 2.565 | 0.000712329 |
| NFKBIA    | 2.564 | 0           |
| LONRF3    | 2.562 | 0           |
| RNF19B    | 2.562 | 0           |
| TUBG2     | 2.561 | 1.11E-11    |
| MIR22HG   | 2.560 | 5.61E-10    |
| TBC1D3L   | 2.558 | 0.00276982  |
| TMSB4X    | 2.555 | 0           |
| ONECUT2   | 2.555 | 0           |
| BRD4      | 2.553 | 0           |
| NAV2      | 2.553 | 0           |
| SREBF1    | 2.552 | 0           |
| SERPINA3  | 2.550 | 0           |
| GNRHR2    | 2.548 | 3.88E-05    |
| TBC1D10C  | 2.546 | 0.007566038 |
| ZFP28     | 2.545 | 0           |
| WEE1      | 2.543 | 0           |
| IRS2      | 2.541 | 7.39E-06    |
| C4B       | 2.541 | 0.01871953  |
| SMG1P1    | 2.539 | 0           |
| SERPINE2  | 2.539 | 0           |
| CSTB      | 2.538 | 0           |
| PKD1P1    | 2.537 | 0           |
| ERF       | 2.537 | 0           |
| UBE2C     | 2.537 | 0           |
| RPL35P1   | 2.536 | 2.06E-05    |
| RIOK3     | 2.535 | 0           |
| IQGAP3    | 2.535 | 0           |
| RPL14P3   | 2.535 | 0.036882085 |
| MAN2C1    | 2.535 | 5.26E-11    |
| ALKBH7    | 2.535 | 0           |
| XAB2      | 2.533 | 0           |
| ATP2A1    | 2.533 | 2.51E-08    |
| HDAC6     | 2.532 | 0           |
| ADA       | 2.530 | 0           |
| HSD17B12  | 2.530 | 0           |
| RRAGC     | 2.529 | 0           |
| UCP2      | 2.529 | 0           |
| MT-ND4    | 2.528 | 3.06E-05    |
| LCAT      | 2.525 | 1.54E-06    |
| GOLGA6L10 | 2.525 | 5.90E-08    |

|            |       |             |
|------------|-------|-------------|
| MASTL      | 2.523 | 0           |
| SIRT7      | 2.522 | 1.33E-12    |
| MUC4       | 2.521 | 0.000716833 |
| HLF        | 2.518 | 0           |
| NPM1P21    | 2.518 | 0.002123328 |
| MT2A       | 2.515 | 0           |
| ACBD5      | 2.515 | 0           |
| MTCO1P12   | 2.514 | 0.000164647 |
| SRPRA      | 2.513 | 0           |
| FEM1B      | 2.510 | 0           |
| THRA       | 2.509 | 0           |
| KDEL1      | 2.509 | 0           |
| EZH1       | 2.508 | 0           |
| RRP7BP     | 2.505 | 1.48E-07    |
| TCTE3      | 2.500 | 1.33E-05    |
| ZNF408     | 2.500 | 0           |
| CRTC2      | 2.500 | 0           |
| JAK3       | 2.499 | 0.000285529 |
| RCOR3      | 2.497 | 0           |
| MAP2K7     | 2.497 | 0           |
| RNF5       | 2.495 | 0           |
| RNF6       | 2.494 | 1.39E-12    |
| ENTPD6     | 2.489 | 0           |
| MICALL2    | 2.486 | 3.33E-16    |
| UBE2SP2    | 2.484 | 0           |
| YEATS2-AS1 | 2.484 | 0.011136004 |
| TMSB10     | 2.484 | 0           |
| SLC6A10P   | 2.482 | 0.001380598 |
| PTPRG-AS1  | 2.478 | 0.043389257 |
| LAPTM4A    | 2.473 | 0           |
| HINFP      | 2.472 | 0           |
| DACT3      | 2.470 | 0           |
| MOB2       | 2.470 | 0           |
| VCPKMT     | 2.469 | 0           |
| NDUFS7     | 2.468 | 0           |
| TMEM51     | 2.468 | 0           |
| HMGB2      | 2.468 | 0           |
| SNHG5      | 2.467 | 0           |
| SIX4       | 2.467 | 0           |
| ADGRB2     | 2.467 | 1.83E-11    |
| MTMR3      | 2.466 | 0           |
| CDK3       | 2.466 | 1.09E-05    |
| FLII       | 2.463 | 0           |
| TMEM39A    | 2.463 | 0           |
| UBAP1      | 2.461 | 0           |



|           |       |             |
|-----------|-------|-------------|
| UNC119    | 2.459 | 3.01E-11    |
| LINC01315 | 2.459 | 3.24E-12    |
| CITED1    | 2.458 | 0           |
| ATG14     | 2.458 | 0           |
| RPS4XP6   | 2.456 | 1.05E-07    |
| COL7A1    | 2.455 | 7.21E-05    |
| STXBP1    | 2.455 | 0           |
| RELT      | 2.454 | 0           |
| AGAP3     | 2.454 | 0           |
| CCDC28A   | 2.453 | 0           |
| IPO8P1    | 2.449 | 0.008040936 |
| SERTAD2   | 2.448 | 0           |
| FSCN1     | 2.448 | 0           |
| TSC22D2   | 2.448 | 0           |
| FLG       | 2.448 | 0.041572521 |
| TAF10     | 2.447 | 4.85E-14    |
| LENG1     | 2.446 | 0           |
| PRMT5-AS1 | 2.445 | 0.001288124 |
| TTLL3     | 2.445 | 2.70E-05    |
| DCUN1D3   | 2.444 | 0           |
| THAP9-AS1 | 2.444 | 0           |
| UCKL1-AS1 | 2.441 | 2.78E-08    |
| CMC2      | 2.438 | 0           |
| CTSD      | 2.438 | 0           |
| SRRM2     | 2.436 | 0           |
| HES7      | 2.436 | 0           |
| GTPBP1    | 2.435 | 0           |
| NFKB2     | 2.434 | 0           |
| BAK1      | 2.434 | 0           |
| CSAD      | 2.433 | 0.001752376 |
| PLP2      | 2.432 | 0           |
| NEDD4L    | 2.432 | 0           |
| RIPK2     | 2.431 | 0           |
| PPFIA3    | 2.430 | 0           |
| ROS1      | 2.428 | 0.000708274 |
| LZTS3     | 2.428 | 0           |
| PFKFB2    | 2.428 | 0           |
| CNTNAP1   | 2.428 | 0           |
| NBAS      | 2.427 | 0           |
| UAP1      | 2.427 | 0           |
| ACTN1     | 2.425 | 0           |
| PIR       | 2.424 | 0           |
| USF2      | 2.421 | 0           |
| ARHGAP45  | 2.421 | 0           |
| ARFIP2    | 2.421 | 0           |

|           |       |             |
|-----------|-------|-------------|
| RN7SL4P   | 2.419 | 0.032360978 |
| RBM25     | 2.417 | 0           |
| FCHSD1    | 2.417 | 1.89E-07    |
| SNHG7     | 2.415 | 0           |
| LAMTOR5   | 2.415 | 0           |
| FBXO44    | 2.414 | 0           |
| RPS9      | 2.411 | 0           |
| BEX4      | 2.411 | 0           |
| DNAJC25   | 2.410 | 0           |
| TRIM7     | 2.408 | 6.95E-09    |
| GPR158    | 2.405 | 1.22E-12    |
| ANKRD20A4 | 2.405 | 5.09E-13    |
| PTS       | 2.402 | 0           |
| BEST1     | 2.402 | 0           |
| ZFAND5    | 2.402 | 0           |
| MYL6      | 2.401 | 0           |
| IGSF8     | 2.401 | 0           |
| CCNG2     | 2.401 | 0           |
| PSMD8     | 2.398 | 0           |
| PPDPF     | 2.397 | 0           |
| PELI1     | 2.396 | 0           |
| ARL4D     | 2.395 | 0.006303947 |
| RC3H1     | 2.393 | 0           |
| NOS1AP    | 2.392 | 1.24E-07    |
| SYT11     | 2.392 | 0           |
| CAMSAP3   | 2.392 | 0.003352128 |
| KIFC2     | 2.392 | 4.27E-09    |
| DNAH17    | 2.391 | 0.01169705  |
| NOVA2     | 2.391 | 0           |
| SMG9      | 2.389 | 0           |
| UBXN6     | 2.388 | 0           |
| ZNF593    | 2.387 | 0           |
| MIGA2     | 2.387 | 0           |
| PACS1     | 2.386 | 0           |
| LAMP2     | 2.385 | 0           |
| NKAIN1    | 2.385 | 0           |
| WHRN      | 2.384 | 1.47E-05    |
| KCNJ14    | 2.383 | 4.93E-14    |
| CHP1      | 2.383 | 0           |
| YY1AP1    | 2.383 | 0           |
| HSP90B1   | 2.382 | 0           |
| TOM1      | 2.382 | 0           |
| PARP6     | 2.381 | 0           |
| PLEKHO2   | 2.381 | 0           |
| UBE2E2    | 2.378 | 0           |

|          |       |             |
|----------|-------|-------------|
| COX14    | 2.378 | 0           |
| GP1BB    | 2.377 | 0.00016097  |
| B3GAT2   | 2.376 | 0.000625236 |
| ZNF121   | 2.375 | 0           |
| C17ORF49 | 2.375 | 0           |
| SF3A2    | 2.373 | 0           |
| RENBP    | 2.373 | 2.66E-07    |
| H1F0     | 2.371 | 0           |
| CAB39L   | 2.370 | 0           |
| SH3BGRL3 | 2.369 | 0           |
| NPIPA8   | 2.369 | 0.000311773 |
| PFKFB3   | 2.368 | 0           |
| DNAJC1   | 2.368 | 0           |
| B4GALNT4 | 2.367 | 0           |
| DUSP4    | 2.366 | 1.11E-16    |
| RPS27    | 2.366 | 0           |
| NUMBL    | 2.366 | 0           |
| RPS27P29 | 2.366 | 0.000870685 |
| ING1     | 2.365 | 0           |
| NTMT1    | 2.364 | 0           |
| FZD5     | 2.363 | 0           |
| WDFY1    | 2.361 | 0           |
| STX5     | 2.358 | 0           |
| TMED9    | 2.356 | 0           |
| KCMF1    | 2.356 | 0           |
| PRKD2    | 2.356 | 0           |
| ATXN2    | 2.355 | 0           |
| FOXN3    | 2.353 | 0           |
| CEBPD    | 2.351 | 0.000740864 |
| GOT1     | 2.351 | 0           |
| MPC2     | 2.351 | 0           |
| MANBA    | 2.350 | 0           |
| RPL37AP1 | 2.350 | 1.02E-08    |
| MSANTD3- |       |             |
| TMEFF1   | 2.350 | 1.09E-14    |
| LAMA1    | 2.349 | 0           |
| ELN      | 2.348 | 1.74E-07    |
| ILVBL    | 2.347 | 0           |
| ECH1     | 2.347 | 0           |
| MEX3D    | 2.346 | 0           |
| PFDN2    | 2.346 | 0           |
| BIN1     | 2.345 | 0           |
| HSF4     | 2.345 | 2.98E-07    |
| FAM219A  | 2.344 | 0           |
| THBS3    | 2.342 | 0           |

|             |       |             |
|-------------|-------|-------------|
| ETV4        | 2.342 | 0           |
| RPL21P39    | 2.341 | 0.019314161 |
| MYNN        | 2.341 | 0           |
| SLC22A18    | 2.340 | 0           |
| SELENOS     | 2.338 | 0           |
| RPS3P6      | 2.338 | 1.73E-12    |
| CD46        | 2.336 | 0           |
| PPFIA1      | 2.336 | 0           |
| TOP3B       | 2.335 | 0.001268658 |
| ZNF692      | 2.334 | 0           |
| PTP4A3      | 2.333 | 0           |
| CBX8        | 2.333 | 0           |
| PRPF3       | 2.332 | 0           |
| NPDC1       | 2.331 | 4.44E-16    |
| WASF2       | 2.331 | 0           |
| CIC         | 2.331 | 0           |
| PYGB        | 2.331 | 0           |
| C2CD2L      | 2.329 | 0           |
| CCDC12      | 2.328 | 0           |
| MSH5-SAPCD1 | 2.327 | 0.00518387  |
| ZNF787      | 2.327 | 0           |
| HLA-C       | 2.326 | 0           |
| TPM4        | 2.325 | 0           |
| SEC24A      | 2.324 | 0           |
| ATN1        | 2.322 | 0           |
| NOTUM       | 2.322 | 0           |
| TIMP2       | 2.322 | 0           |
| NDE1        | 2.321 | 0           |
| ZNF394      | 2.321 | 0           |
| COQ10B      | 2.320 | 3.55E-15    |
| SLC39A7     | 2.320 | 0           |
| RPS26P3     | 2.318 | 0.002266563 |
| FABP7       | 2.318 | 0           |
| AGAP7P      | 2.317 | 1.10E-06    |
| SSC5D       | 2.315 | 0.000294693 |
| PITHD1      | 2.313 | 0           |
| TEAD4       | 2.313 | 0           |
| TTC7B       | 2.312 | 0           |
| ARHGAP19    | 2.311 | 0           |
| ZNF25       | 2.311 | 0           |
| EPB41L1     | 2.310 | 0           |
| MICAL1      | 2.309 | 3.33E-16    |
| CNKSR1      | 2.309 | 0.033678899 |
| CDK10       | 2.309 | 1.05E-07    |
| YPEL5       | 2.307 | 0           |

|              |       |             |
|--------------|-------|-------------|
| GUK1         | 2.305 | 0           |
| RPS26P28     | 2.305 | 0.003448487 |
| MT-CO1       | 2.303 | 0.017908894 |
| C6ORF106     | 2.303 | 0           |
| ABTB1        | 2.303 | 0           |
| BRD2         | 2.303 | 0           |
| TCEAL3       | 2.302 | 0           |
| STAP2        | 2.301 | 7.03E-10    |
| C20ORF96     | 2.301 | 4.27E-07    |
| FAM102A      | 2.300 | 0           |
| ST3GAL4      | 2.299 | 0           |
| MTND4P24     | 2.298 | 0.000881256 |
| NME1-NME2    | 2.298 | 2.65E-13    |
| TRAF6        | 2.298 | 0           |
| EIF1B        | 2.297 | 0           |
| GMIP         | 2.296 | 0           |
| GABARAPL2    | 2.296 | 0           |
| RPS18P12     | 2.296 | 0           |
| STXBP2       | 2.289 | 7.77E-09    |
| TNPO1P3      | 2.289 | 0.049500461 |
| WDR62        | 2.287 | 0           |
| PDLIM7       | 2.285 | 5.44E-15    |
| SMOX         | 2.285 | 0           |
| EPB41L4A-AS1 | 2.284 | 0           |
| TSPAN9       | 2.284 | 3.33E-16    |
| RPL21P93     | 2.284 | 3.05E-10    |
| RPL18        | 2.282 | 0           |
| C15ORF61     | 2.281 | 0           |
| MAPK8IP3     | 2.281 | 0           |
| CD63         | 2.280 | 0           |
| GNL2         | 2.280 | 0           |
| RPL13AP6     | 2.279 | 3.85E-08    |
| JMY          | 2.279 | 0           |
| MAPKBP1      | 2.278 | 0           |
| SRSF4        | 2.276 | 0           |
| TMEM38B      | 2.275 | 0           |
| DPP7         | 2.273 | 0           |
| GGNBP2       | 2.272 | 0           |
| ZBTB2        | 2.271 | 0           |
| CETN2        | 2.271 | 0           |
| KCTD7        | 2.271 | 0           |
| SRSF2        | 2.269 | 8.76E-06    |
| MAPK3        | 2.266 | 0           |
| NID1         | 2.265 | 0           |
| PPARD        | 2.265 | 0           |

|           |       |             |
|-----------|-------|-------------|
| TPT1P9    | 2.265 | 0           |
| FBXL12    | 2.264 | 0           |
| FLNA      | 2.263 | 0           |
| RPL12P42  | 2.263 | 0           |
| ARFGAP3   | 2.261 | 0           |
| POP7      | 2.261 | 0           |
| ZDHHC11B  | 2.260 | 6.00E-14    |
| RANBP10   | 2.259 | 0           |
| LRRC8A    | 2.259 | 0           |
| TNFAIP8L1 | 2.258 | 0           |
| GPR135    | 2.255 | 3.12E-08    |
| KLHL26    | 2.253 | 3.46E-10    |
| GSTM2     | 2.249 | 0.00431883  |
| TMC8      | 2.249 | 5.49E-11    |
| POLR3D    | 2.249 | 0           |
| EPHX1     | 2.248 | 0           |
| CNN3      | 2.247 | 0           |
| NOP53     | 2.247 | 0           |
| RNASEK    | 2.246 | 0           |
| SCFD1     | 2.246 | 0           |
| ECM1      | 2.246 | 2.38E-09    |
| SNTA1     | 2.245 | 0           |
| USP36     | 2.245 | 0           |
| EFNA4     | 2.245 | 3.79E-09    |
| DPM3      | 2.245 | 0           |
| MICAL2    | 2.244 | 2.31E-14    |
| CA5B      | 2.244 | 0           |
| PTPN23    | 2.242 | 0           |
| PROX1     | 2.242 | 0           |
| LAMB1     | 2.241 | 0           |
| OSBPL2    | 2.241 | 0           |
| DDTL      | 2.241 | 1.17E-12    |
| SDCBP     | 2.240 | 0           |
| MRPS30    | 2.237 | 0           |
| ELL       | 2.236 | 0           |
| PTGDS     | 2.236 | 0           |
| TMEM159   | 2.235 | 0           |
| ZBTB21    | 2.234 | 0           |
| INO80D    | 2.234 | 0           |
| FXYD3     | 2.232 | 3.58E-06    |
| TGFB1I1   | 2.230 | 0           |
| SERPINH1  | 2.229 | 0           |
| SBNO2     | 2.228 | 0           |
| RNF187    | 2.227 | 0           |
| CMYA5     | 2.227 | 0.019692967 |

|           |       |             |
|-----------|-------|-------------|
| EEF1A1P19 | 2.227 | 0           |
| RPS12     | 2.226 | 0           |
| ATXN7L2   | 2.224 | 7.02E-09    |
| CYCS      | 2.224 | 0           |
| MIB2      | 2.222 | 1.71E-08    |
| ACVR2B    | 2.222 | 5.11E-05    |
| RPL7AP31  | 2.219 | 2.05E-07    |
| PNN       | 2.219 | 0           |
| TPT1P6    | 2.219 | 2.18E-09    |
| PRKAB2    | 2.217 | 0           |
| RPL18AP3  | 2.217 | 0           |
| RND1      | 2.217 | 0.020272459 |
| PPP1R18   | 2.216 | 0           |
| YIF1B     | 2.216 | 0           |
| RPS26P47  | 2.214 | 3.98E-06    |
| MAD2L2    | 2.213 | 0           |
| PLEKHH3   | 2.213 | 1.30E-13    |
| FN3K      | 2.213 | 0           |
| ZNF513    | 2.212 | 0           |
| FRY       | 2.211 | 0           |
| RPL23P8   | 2.210 | 0.000497393 |
| RPL10P3   | 2.209 | 3.83E-07    |
| GPX4      | 2.209 | 0           |
| PARP2     | 2.206 | 0           |
| KLF5      | 2.206 | 2.22E-08    |
| KCNQ4     | 2.206 | 0           |
| POR       | 2.205 | 0           |
| ATP1A1    | 2.204 | 0           |
| RRP12     | 2.204 | 0           |
| FXVD7     | 2.204 | 0.000355033 |
| IER2      | 2.203 | 0           |
| GNB2      | 2.200 | 0           |
| TIMP1     | 2.200 | 0           |
| RIT1      | 2.199 | 0           |
| RBM33     | 2.199 | 0           |
| ISCU      | 2.199 | 0           |
| TRMT112   | 2.198 | 0           |
| RPS16     | 2.197 | 0           |
| BAG1      | 2.193 | 0           |
| FAM157A   | 2.192 | 0.008864495 |
| FLCN      | 2.192 | 0           |
| NAB2      | 2.191 | 0           |
| CSNK1E    | 2.190 | 0           |
| RYBP      | 2.190 | 0           |
| APBA3     | 2.190 | 0           |

|            |       |             |
|------------|-------|-------------|
| SOCS3      | 2.190 | 8.86E-06    |
| CEP70      | 2.190 | 0           |
| SCAMP3     | 2.189 | 0           |
| RPL31      | 2.188 | 0           |
| RPL21      | 2.188 | 0           |
| CAMLG      | 2.187 | 0           |
| CLU        | 2.186 | 0           |
| KDM6A      | 2.186 | 3.21E-10    |
| GJA3       | 2.185 | 4.92E-12    |
| RHPN1      | 2.184 | 0.000176727 |
| PIP4P2     | 2.184 | 0           |
| EEF1A1P11  | 2.183 | 0           |
| SMNDC1     | 2.183 | 0           |
| HK1        | 2.182 | 0           |
| ZNF678     | 2.181 | 0           |
| RPL21P120  | 2.181 | 0           |
| RPL28      | 2.180 | 0           |
| B3GNT2     | 2.179 | 3.64E-14    |
| CHTF18     | 2.179 | 4.71E-12    |
| RPL21P28   | 2.179 | 0           |
| DRG1       | 2.179 | 0           |
| RMC1       | 2.179 | 0           |
| SERINC1    | 2.178 | 0           |
| FAM214B    | 2.177 | 0           |
| KIF3C      | 2.176 | 0           |
| CERS1      | 2.175 | 0           |
| RPL12P4    | 2.174 | 2.22E-16    |
| AP5Z1      | 2.171 | 0           |
| RPL21P11   | 2.170 | 2.07E-12    |
| ITPKC      | 2.169 | 0           |
| CSGALNACT2 | 2.169 | 0           |
| MINK1      | 2.168 | 3.60E-05    |
| CSNK1G2    | 2.168 | 0           |
| RAB5B      | 2.168 | 0           |
| CNKSR3     | 2.168 | 0           |
| OTUD3      | 2.168 | 0           |
| BANF1P3    | 2.167 | 0.006645682 |
| CEBPG      | 2.165 | 0           |
| RPS19      | 2.164 | 0           |
| RBM22      | 2.163 | 0           |
| ASAHI      | 2.161 | 0           |
| KXD1       | 2.160 | 0           |
| SYNE3      | 2.158 | 0           |
| CCDC159    | 2.157 | 0.01188999  |
| RPL21P75   | 2.157 | 0           |



|                    |       |             |
|--------------------|-------|-------------|
| TCEA1              | 2.157 | 0           |
| TBC1D8             | 2.156 | 0           |
| TMED3              | 2.156 | 0           |
| RPLP1              | 2.156 | 0           |
| TTC9C              | 2.156 | 0           |
| SSSCA1             | 2.155 | 0           |
| C12ORF49           | 2.154 | 0           |
| TPT1P4             | 2.152 | 0.005605297 |
| ARL8A              | 2.151 | 0           |
| GPNMB              | 2.150 | 0           |
| TUBB4A             | 2.150 | 0           |
| MYC                | 2.149 | 0.000338613 |
| TIMM23B            | 2.149 | 0           |
| RPLP0P6            | 2.149 | 0           |
| GLA                | 2.146 | 0           |
| MRPL55             | 2.145 | 0           |
| TLE3               | 2.144 | 4.06E-07    |
| RPL13AP25          | 2.144 | 0           |
| PGM2L1             | 2.143 | 1.78E-15    |
| PCDHGA4            | 2.143 | 4.66E-06    |
| SLC25A37           | 2.143 | 0           |
| AARS               | 2.143 | 0           |
| RPS3               | 2.143 | 0           |
| HUS1               | 2.142 | 0           |
| PGM3               | 2.142 | 0           |
| RHEB               | 2.142 | 0           |
| RAB4B              | 2.141 | 0           |
| IRF9               | 2.141 | 9.49E-10    |
| USP3               | 2.141 | 0           |
| RPL23AP82          | 2.141 | 0           |
| RPL24P8            | 2.140 | 2.90E-11    |
| RNF126             | 2.139 | 0           |
| LRRC75B            | 2.139 | 0           |
| B2M                | 2.138 | 0           |
| CBFA2T2            | 2.138 | 0           |
| SLC9A3R1           | 2.137 | 0           |
| CCND2              | 2.137 | 0           |
| NFATC4             | 2.137 | 7.99E-15    |
| GABARAP            | 2.136 | 0           |
| BRAF               | 2.135 | 0           |
| LRRC75A-AS1        | 2.135 | 0           |
| VCPIP1             | 2.135 | 0           |
| FAM47E-STBD1       | 2.135 | 0.001021198 |
| RPL36A-<br>HNRNPH2 | 2.134 | 0.001066765 |

|           |       |             |
|-----------|-------|-------------|
| SH3GL1    | 2.133 | 0           |
| GNB5      | 2.132 | 0           |
| MBOAT7    | 2.132 | 0           |
| GIPR      | 2.130 | 0.01016119  |
| NT5DC3    | 2.130 | 0           |
| RPL36     | 2.130 | 0           |
| S100A6    | 2.130 | 0           |
| RPS15AP38 | 2.127 | 0.000582203 |
| KDEL2     | 2.126 | 0           |
| BRPF1     | 2.125 | 0           |
| GPR137C   | 2.124 | 0.000383399 |
| VIM       | 2.124 | 0           |
| CDADC1    | 2.124 | 0           |
| RPSAP54   | 2.123 | 1.90E-12    |
| TOMM7     | 2.122 | 0           |
| RPL21P134 | 2.121 | 1.63E-11    |
| HSF2      | 2.121 | 0           |
| USE1      | 2.120 | 0           |
| NET1      | 2.119 | 0           |
| COPS2     | 2.119 | 0           |
| CDCA3     | 2.118 | 0           |
| RPL14P1   | 2.117 | 0           |
| CDC25B    | 2.117 | 0           |
| NACA3P    | 2.117 | 1.08E-10    |
| PRSS23    | 2.115 | 0           |
| RPL7P32   | 2.115 | 0.006279543 |
| ZFYVE1    | 2.114 | 0           |
| SLC35A2   | 2.114 | 0           |
| NELFA     | 2.114 | 0           |
| KMT2B     | 2.112 | 0           |
| DYNLL2    | 2.111 | 0           |
| CXADR     | 2.110 | 0           |
| SELENOK   | 2.110 | 0           |
| CNTROB    | 2.110 | 7.20E-10    |
| DPH7      | 2.110 | 0           |
| THAP1     | 2.109 | 0           |
| PAXX      | 2.109 | 0           |
| PABPC1L   | 2.109 | 0.001388574 |
| WHAMM     | 2.109 | 0           |
| DYNC1LI1  | 2.108 | 0           |
| RPS5      | 2.107 | 0           |
| TFAP4     | 2.107 | 0           |
| DSTN      | 2.107 | 0           |
| ANKS3     | 2.105 | 0           |
| R3HDM4    | 2.105 | 0           |

|            |       |             |
|------------|-------|-------------|
| SIAH2      | 2.102 | 0           |
| SND1       | 2.102 | 0           |
| ANKRD9     | 2.102 | 0           |
| FO XK2     | 2.101 | 0           |
| ARNT       | 2.101 | 0           |
| HPCAL1     | 2.101 | 0           |
| DCAF11     | 2.100 | 0           |
| FKBP10     | 2.100 | 3.65E-06    |
| NCKIPSD    | 2.100 | 0           |
| LMNTD2     | 2.099 | 0.023165015 |
| FAM160B2   | 2.099 | 1.79E-13    |
| PTTG1      | 2.099 | 0           |
| DOCK6      | 2.099 | 1.44E-15    |
| EEF1D      | 2.099 | 0           |
| GAN        | 2.099 | 1.92E-07    |
| STT3A      | 2.098 | 0           |
| ISL2       | 2.098 | 0           |
| OGA        | 2.097 | 0           |
| FAM117A    | 2.097 | 0           |
| DDX47      | 2.097 | 0           |
| CADPS2     | 2.097 | 0.045455183 |
| RPL13AP20  | 2.097 | 0           |
| TXN        | 2.095 | 0           |
| ULBP2      | 2.095 | 0.000905284 |
| PAXBP1     | 2.095 | 0           |
| CDK11A     | 2.095 | 3.07E-10    |
| CCNI       | 2.094 | 0           |
| KIF2C      | 2.093 | 0           |
| C9ORF72    | 2.092 | 0           |
| SEMA3B     | 2.091 | 3.75E-11    |
| CDH24      | 2.089 | 0           |
| C1ORF35    | 2.089 | 2.42E-07    |
| RPS11      | 2.088 | 0           |
| CDC34      | 2.088 | 0           |
| IRX5       | 2.087 | 0           |
| TESK1      | 2.087 | 4.00E-12    |
| RBM6       | 2.086 | 1.41E-07    |
| RAP2B      | 2.086 | 0           |
| TNKS       | 2.085 | 0           |
| FBXW5      | 2.085 | 0           |
| RPL27A     | 2.084 | 0           |
| RPL13AP7   | 2.084 | 2.28E-12    |
| TPT1       | 2.083 | 0           |
| BTAF1      | 2.083 | 0           |
| ZNF433-AS1 | 2.083 | 0           |

|           |       |             |
|-----------|-------|-------------|
| SEC23A    | 2.083 | 0           |
| GPCPD1    | 2.081 | 0           |
| HMGA1P3   | 2.081 | 0.04633685  |
| MTCO2P12  | 2.081 | 0.00028737  |
| CHORDC1   | 2.080 | 1.15E-14    |
| GOLGA5    | 2.079 | 0           |
| RPS17     | 2.078 | 0           |
| RPSAP19   | 2.077 | 0           |
| CHIC1     | 2.077 | 0           |
| GPR173    | 2.077 | 0           |
| GIMAP2    | 2.075 | 0.000269474 |
| LINC01001 | 2.074 | 0.003004113 |
| RPS25     | 2.073 | 0           |
| PILRB     | 2.073 | 0.025408012 |
| COG5      | 2.073 | 0           |
| PITPNM1   | 2.073 | 0           |
| RPL21P16  | 2.072 | 0           |
| TULP3     | 2.072 | 0           |
| SPARC     | 2.072 | 3.25E-12    |
| RPS15     | 2.071 | 0           |
| MERTK     | 2.070 | 0           |
| CCDC112   | 2.069 | 0           |
| RPL37A    | 2.069 | 0           |
| ARHGAP5   | 2.069 | 9.30E-06    |
| RAB30     | 2.069 | 0           |
| KCNE4     | 2.068 | 2.77E-07    |
| TICRR     | 2.068 | 0           |
| CPT1B     | 2.068 | 0.025189356 |
| SH3PXD2A  | 2.068 | 0           |
| TMEFF1    | 2.067 | 6.85E-12    |
| EEF1A1P7  | 2.067 | 9.30E-11    |
| TMEM147   | 2.066 | 0           |
| SHISA4    | 2.065 | 0           |
| PPL       | 2.065 | 0.003368119 |
| RPL13AP5  | 2.065 | 0           |
| ZBTB8A    | 2.065 | 3.03E-12    |
| RPL12P12  | 2.063 | 7.52E-06    |
| EEF1A1P6  | 2.063 | 0           |
| PRPF38B   | 2.063 | 0           |
| RELA      | 2.063 | 0           |
| RPL36AP26 | 2.062 | 0.003052278 |
| RPL36A    | 2.062 | 0           |
| PNCK      | 2.061 | 0.000601467 |
| IZUMO4    | 2.060 | 0.008774735 |
| TAF13     | 2.059 | 0           |

|          |       |             |
|----------|-------|-------------|
| IFITM1   | 2.059 | 4.77E-05    |
| SF3B1    | 2.059 | 0           |
| ZPR1     | 2.059 | 0           |
| ARID3B   | 2.058 | 7.46E-09    |
| EEF1DP1  | 2.057 | 0.042174421 |
| RPL18A   | 2.056 | 0           |
| ORAI1    | 2.055 | 0           |
| GATAD2B  | 2.055 | 0           |
| TPT1-AS1 | 2.055 | 0           |
| EEF1A1P9 | 2.054 | 0           |
| SLC25A27 | 2.054 | 8.93E-05    |
| DDR2     | 2.054 | 0           |
| ARNTL    | 2.052 | 2.18E-08    |
| VDAC2    | 2.052 | 0           |
| RHEBP1   | 2.050 | 9.18E-06    |
| UFD1     | 2.050 | 5.56E-12    |
| TAGLN2   | 2.050 | 0           |
| WASH6P   | 2.049 | 2.74E-12    |
| WASH6P   | 2.049 | 2.74E-12    |
| TRIM67   | 2.048 | 6.90E-13    |
| RPL41P2  | 2.047 | 0           |
| TTK      | 2.047 | 0           |
| RAB7A    | 2.047 | 0           |
| PLXND1   | 2.047 | 0           |
| SARS     | 2.046 | 0           |
| PLEKHM2  | 2.045 | 0           |
| MAPK6    | 2.045 | 1.93E-10    |
| COLGALT1 | 2.044 | 0           |
| WSB1     | 2.044 | 0           |
| TCF20    | 2.044 | 0           |
| RACGAP1  | 2.043 | 0           |
| RPL10P16 | 2.043 | 0           |
| HCN2     | 2.043 | 0           |
| VGLL3    | 2.043 | 0.014356366 |
| RPL35P2  | 2.042 | 3.44E-12    |
| TIAL1    | 2.042 | 0           |
| TMEM126A | 2.041 | 0           |
| ZNF133   | 2.041 | 0           |
| AKAP2    | 2.040 | 4.00E-11    |
| SMS      | 2.040 | 0           |
| LMBR1L   | 2.040 | 0           |
| LHFPL3   | 2.040 | 0           |
| RPS26    | 2.040 | 0           |
| SLC9A3R2 | 2.040 | 0           |
| SLC25A36 | 2.040 | 0           |

|          |       |             |
|----------|-------|-------------|
| RNF7     | 2.040 | 0           |
| CHKA     | 2.040 | 0           |
| RPSAP18  | 2.039 | 0.0012248   |
| RPL12    | 2.038 | 0           |
| DLGAP4   | 2.037 | 0           |
| RIMKLB   | 2.036 | 0           |
| RPL10    | 2.036 | 0           |
| KIAA1671 | 2.036 | 5.34E-08    |
| SF3B2    | 2.035 | 0           |
| PLS3     | 2.034 | 0           |
| SF3A1    | 2.032 | 0           |
| EEF1A1P5 | 2.032 | 0           |
| RAB5A    | 2.032 | 0           |
| CD151    | 2.031 | 0           |
| RPS23P8  | 2.031 | 0           |
| EEF1B2P3 | 2.031 | 0           |
| RPLP0    | 2.029 | 0           |
| IFNGR1   | 2.029 | 0           |
| HDLBP    | 2.029 | 0           |
| ARF4     | 2.029 | 0           |
| GAS6     | 2.028 | 0.012634524 |
| L1CAM    | 2.027 | 0           |
| NECAP1   | 2.026 | 1.82E-14    |
| RPS13    | 2.026 | 0           |
| RUNDC3A  | 2.025 | 0           |
| LITAF    | 2.025 | 0           |
| RPS18    | 2.025 | 0           |
| MAP3K3   | 2.025 | 0           |
| MTSS1L   | 2.025 | 0           |
| COX10    | 2.023 | 1.12E-13    |
| AIFM1    | 2.023 | 0           |
| SOD2     | 2.023 | 0           |
| MRC2     | 2.023 | 0           |
| EME2     | 2.022 | 1.10E-05    |
| ZW10     | 2.022 | 0           |
| TUBBP1   | 2.021 | 8.84E-13    |
| SPTY2D1  | 2.020 | 5.37E-12    |
| TMEM11   | 2.020 | 0           |
| KIT      | 2.019 | 0           |
| LMAN1    | 2.018 | 0           |
| ISY1     | 2.018 | 0           |
| TBC1D25  | 2.018 | 0           |
| RPL13A   | 2.017 | 0           |
| RPL12P17 | 2.015 | 1.32E-08    |
| RPS13P2  | 2.015 | 9.10E-11    |

|           |       |             |
|-----------|-------|-------------|
| YWHAZ     | 2.014 | 0           |
| RPL38     | 2.014 | 0           |
| PPIL4     | 2.013 | 0           |
| GSTO1     | 2.012 | 0           |
| PFDN5     | 2.012 | 0           |
| UIMC1     | 2.012 | 0           |
| EEF1A1P13 | 2.011 | 0           |
| FBN1      | 2.011 | 0           |
| QPCTL     | 2.009 | 0           |
| MAP3K10   | 2.008 | 0           |
| FOXD1-AS1 | 2.007 | 3.97E-08    |
| EEF1A1P4  | 2.007 | 0           |
| ZNF571    | 2.007 | 1.28E-14    |
| GOLGA6L9  | 2.007 | 2.22E-16    |
| FZR1      | 2.006 | 0           |
| CEP57     | 2.006 | 0           |
| SYPL1     | 2.005 | 0           |
| RPL29P11  | 2.005 | 2.35E-11    |
| EEF1A1    | 2.005 | 0           |
| RPL10P9   | 2.003 | 0           |
| TMEM189-  |       |             |
| UBE2V1    | 2.003 | 0.010611235 |
| ISG15     | 2.003 | 4.01E-12    |
| MRPL52    | 2.003 | 0           |
| GNAI3     | 2.002 | 0           |
| RPN1      | 2.002 | 0           |
| RPL26     | 2.002 | 0           |
| PTP4A1    | 2.002 | 0           |
| LRRN4CL   | 2.001 | 0           |
| FAF1      | 2.000 | 0           |
| ITPA      | 0.500 | 0           |
| ARL10     | 0.500 | 0           |
| BPTF      | 0.500 | 0           |
| CX3CL1    | 0.499 | 0           |
| ZNF275    | 0.499 | 0           |
| ZNF146    | 0.499 | 0           |
| DCHS1     | 0.499 | 2.80E-07    |
| ILDR2     | 0.499 | 0           |
| INTS9     | 0.499 | 0           |
| B3GAT1    | 0.499 | 0           |
| DEPDC1    | 0.498 | 1.33E-11    |
| PCDHB8    | 0.498 | 0.001853187 |
| ZNF765    | 0.498 | 0           |
| UPRT      | 0.498 | 1.11E-16    |
| ASB7      | 0.498 | 1.11E-11    |

|          |       |            |
|----------|-------|------------|
| DCUN1D2  | 0.498 | 0          |
| FGF12    | 0.498 | 0          |
| KCTD17   | 0.497 | 2.58E-14   |
| TNS3     | 0.497 | 0          |
| TTF1     | 0.497 | 0          |
| PDGFC    | 0.497 | 0          |
| VSIG10   | 0.496 | 0          |
| ZMPSTE24 | 0.496 | 0          |
| TMSB15B  | 0.496 | 3.70E-05   |
| KIAA1147 | 0.496 | 0          |
| APAF1    | 0.496 | 0          |
| ZNF48    | 0.496 | 0          |
| ZNF862   | 0.496 | 0          |
| DPY19L3  | 0.496 | 0          |
| NBPF12   | 0.495 | 0          |
| SSH1     | 0.495 | 0          |
| FAHD1    | 0.495 | 0          |
| C19ORF12 | 0.495 | 0          |
| OGFOD2   | 0.495 | 0          |
| EEF2KMT  | 0.495 | 0          |
| TMEM181  | 0.495 | 0          |
| ZNF470   | 0.495 | 6.14E-13   |
| ZNF577   | 0.495 | 1.04E-11   |
| TBRG1    | 0.495 | 0          |
| SH3RF1   | 0.495 | 0          |
| LIFR     | 0.494 | 0          |
| ZMYND11  | 0.494 | 0          |
| TRMT13   | 0.494 | 1.11E-16   |
| MDGA2    | 0.494 | 6.85E-06   |
| LIMCH1   | 0.494 | 0          |
| AGPAT5   | 0.494 | 0          |
| CNOT11   | 0.494 | 0          |
| DSCC1    | 0.494 | 3.49E-08   |
| PMPCA    | 0.494 | 0          |
| MRPL50   | 0.493 | 0          |
| SKA3     | 0.493 | 0          |
| FYCO1    | 0.493 | 0          |
| IL17RB   | 0.493 | 0.01437785 |
| ZNF300   | 0.493 | 0          |
| MTM1     | 0.493 | 7.77E-16   |
| ZNF761   | 0.493 | 0          |
| PEX6     | 0.493 | 0          |
| NOP9     | 0.493 | 0          |
| ARNTL2   | 0.492 | 4.58E-09   |
| WRN      | 0.492 | 0          |



|           |       |             |
|-----------|-------|-------------|
| ADM5      | 0.491 | 0.000190251 |
| TRIM21    | 0.491 | 0.002940368 |
| TGS1      | 0.491 | 1.75E-13    |
| GALNT1    | 0.491 | 0           |
| GPR19     | 0.491 | 2.26E-08    |
| CHM       | 0.490 | 1.90E-10    |
| PPIL2     | 0.490 | 0           |
| MRS2      | 0.490 | 0           |
| CBY1      | 0.490 | 0           |
| BRD7      | 0.489 | 0           |
| PIGP      | 0.489 | 6.00E-15    |
| TNRC18    | 0.489 | 0           |
| FAM84A    | 0.489 | 0           |
| ZNF43     | 0.489 | 0           |
| FARP2     | 0.489 | 0           |
| FAM57A    | 0.489 | 0           |
| SMIM19    | 0.488 | 0           |
| TEDC1     | 0.488 | 0           |
| PIGN      | 0.488 | 0           |
| TRMO      | 0.488 | 3.80E-13    |
| PXMP4     | 0.488 | 0           |
| USP27X    | 0.488 | 2.59E-08    |
| SLC19A1   | 0.488 | 0           |
| C14ORF119 | 0.488 | 4.44E-16    |
| CARS2     | 0.487 | 0           |
| C6ORF62   | 0.487 | 2.22E-16    |
| MAK16     | 0.487 | 0           |
| DIS3L     | 0.487 | 0           |
| COBL      | 0.487 | 0           |
| ZNF141    | 0.487 | 3.00E-07    |
| CMTR2     | 0.487 | 0           |
| EEF2K     | 0.486 | 0           |
| RABIF     | 0.486 | 0           |
| ADSL      | 0.486 | 0           |
| TRIO      | 0.486 | 0           |
| EDIL3     | 0.486 | 0           |
| C3ORF62   | 0.486 | 4.60E-05    |
| DCBLD2    | 0.486 | 0           |
| NEDD9     | 0.486 | 3.44E-15    |
| ARAP2     | 0.486 | 0           |
| AIMP2     | 0.485 | 0           |
| IGSF3     | 0.485 | 0           |
| ARNT2     | 0.485 | 0           |
| NXT2      | 0.485 | 0           |
| CLHC1     | 0.485 | 6.75E-08    |

|          |       |             |
|----------|-------|-------------|
| RAD17    | 0.485 | 0           |
| MIDN     | 0.485 | 0           |
| TM7SF3   | 0.485 | 0           |
| ZIC1     | 0.484 | 1.28E-10    |
| GLYCTK   | 0.484 | 4.56E-08    |
| FAM220A  | 0.483 | 0           |
| PHF6     | 0.483 | 0           |
| HPS5     | 0.483 | 0           |
| ZNF155   | 0.483 | 3.03E-14    |
| ATG4C    | 0.483 | 0           |
| SMAP2    | 0.483 | 0           |
| LARP4    | 0.483 | 0           |
| DHTKD1   | 0.482 | 0           |
| ADPRHL2  | 0.482 | 0           |
| SLC35B2  | 0.482 | 0           |
| ZNF281   | 0.482 | 0           |
| NFYC-AS1 | 0.482 | 0.003053723 |
| METTL4   | 0.482 | 0           |
| ZNF740   | 0.481 | 0           |
| PEX7     | 0.481 | 2.92E-06    |
| SLC35E2A | 0.481 | 4.11E-14    |
| ELMOD3   | 0.481 | 0           |
| RMDN1    | 0.481 | 0           |
| ZNF32    | 0.481 | 0           |
| PPP6R2   | 0.481 | 0           |
| ZDHHC21  | 0.481 | 0           |
| TANK     | 0.481 | 0           |
| FAR2     | 0.480 | 6.54E-11    |
| ANKS6    | 0.480 | 0           |
| ZADH2    | 0.480 | 0           |
| AR       | 0.480 | 0           |
| SLC38A1  | 0.480 | 0           |
| MDP1     | 0.480 | 1.43E-07    |
| PJVK     | 0.480 | 0.017836286 |
| TSNAX    | 0.479 | 0           |
| TATDN3   | 0.479 | 0           |
| PPHLN1   | 0.479 | 0           |
| SLC36A1  | 0.479 | 0           |
| MISP3    | 0.479 | 1.32E-10    |
| APBB2    | 0.479 | 0           |
| UBE3C    | 0.479 | 0           |
| RGMA     | 0.479 | 0           |
| MAGI1    | 0.479 | 0           |
| PDIK1L   | 0.479 | 1.89E-12    |
| BCHE     | 0.479 | 0           |

|           |       |             |
|-----------|-------|-------------|
| MAP3K11   | 0.479 | 0           |
| ESPL1     | 0.479 | 0           |
| PSAT1     | 0.478 | 0           |
| ITPR2     | 0.478 | 0           |
| MTMR9LP   | 0.478 | 2.19E-12    |
| LEF1      | 0.478 | 0           |
| FAM171A1  | 0.478 | 0           |
| HOXC6     | 0.478 | 6.50E-07    |
| MOB1A     | 0.478 | 0           |
| POLA2     | 0.477 | 0           |
| USP18     | 0.477 | 0.000536615 |
| B4GAT1    | 0.477 | 0           |
| BAG2      | 0.477 | 0           |
| OGFOD3    | 0.477 | 0           |
| LINC00888 | 0.477 | 5.86E-05    |
| LUC7L3    | 0.477 | 0           |
| SLC25A53  | 0.477 | 0.027130186 |
| GNPTAB    | 0.476 | 0           |
| CCDC88A   | 0.476 | 0           |
| KIAA1217  | 0.476 | 0           |
| CMTM5     | 0.476 | 0           |
| ATP13A2   | 0.476 | 0           |
| EIF3EP1   | 0.475 | 0.011787069 |
| ZCCHC14   | 0.475 | 0           |
| NEMF      | 0.475 | 0           |
| LLGL1     | 0.475 | 0           |
| LRRN1     | 0.475 | 0           |
| PARG      | 0.475 | 0           |
| RNPC3     | 0.475 | 7.12E-09    |
| ERCC6L2   | 0.475 | 0           |
| GDF11     | 0.475 | 0           |
| TAF2      | 0.474 | 0           |
| FANCC     | 0.474 | 0           |
| DDI2      | 0.474 | 9.99E-16    |
| SMCR8     | 0.474 | 0           |
| PUS7      | 0.474 | 0           |
| SSC4D     | 0.473 | 0.016548762 |
| DUS4L     | 0.473 | 0           |
| ST3GAL6   | 0.473 | 0           |
| MCCC1     | 0.473 | 0           |
| STXBP5    | 0.473 | 0           |
| ALKBH4    | 0.473 | 0           |
| DNAAF2    | 0.473 | 0           |
| DNAJB12   | 0.473 | 0           |
| ACBD4     | 0.473 | 6.01E-08    |

|               |       |             |
|---------------|-------|-------------|
| SPRTN         | 0.473 | 0           |
| KREMEN1       | 0.472 | 0           |
| SDHAF2        | 0.472 | 1.11E-16    |
| SYNJ2BP-COX16 | 0.472 | 0.013876558 |
| PHF20L1       | 0.472 | 0           |
| VPS50         | 0.472 | 2.40E-14    |
| THSD1         | 0.472 | 5.34E-14    |
| LRRC14        | 0.472 | 0           |
| OSER1-DT      | 0.472 | 4.66E-08    |
| ADO           | 0.472 | 0           |
| CYB5R4        | 0.472 | 0           |
| NPAT          | 0.471 | 0           |
| SLF2          | 0.471 | 0           |
| GTF3C2        | 0.471 | 0           |
| C3ORF52       | 0.470 | 4.17E-09    |
| DNASE1        | 0.470 | 0           |
| DNAJC5        | 0.470 | 0           |
| RPS6KB1       | 0.470 | 0           |
| STK38L        | 0.470 | 0           |
| ZNF485        | 0.470 | 2.41E-07    |
| ZEB1-AS1      | 0.470 | 0.000416709 |
| THAP11        | 0.469 | 0           |
| ITPRIPL2      | 0.469 | 0           |
| METTL8        | 0.469 | 0           |
| FAM118B       | 0.469 | 0           |
| FAM32A        | 0.469 | 0           |
| RAB7B         | 0.469 | 0.022986981 |
| ARID2         | 0.469 | 4.00E-15    |
| TNFAIP8       | 0.469 | 0           |
| LCTL          | 0.468 | 0.006315443 |
| TBC1D16       | 0.468 | 0           |
| ZNF638        | 0.468 | 0           |
| ANKRD26       | 0.467 | 0           |
| PPP3CB-AS1    | 0.467 | 0.045057433 |
| KHK           | 0.467 | 0           |
| CDKN2B-AS1    | 0.467 | 0.024961624 |
| PCDH7         | 0.467 | 0           |
| TGFA          | 0.467 | 9.84E-09    |
| ST8SIA1       | 0.467 | 0           |
| INIP          | 0.467 | 0           |
| EMILIN1       | 0.467 | 0.004179109 |
| CHD9          | 0.467 | 0           |
| MYCBP         | 0.467 | 6.77E-15    |
| ZNF564        | 0.467 | 9.57E-07    |
| SLC30A9       | 0.467 | 0           |

|           |       |             |
|-----------|-------|-------------|
| EVI5      | 0.466 | 0           |
| TGIF2     | 0.466 | 0           |
| CASC11    | 0.466 | 0.005883679 |
| MEPCE     | 0.466 | 0           |
| NEURL2    | 0.466 | 1.48E-07    |
| CEP72     | 0.465 | 0           |
| NME6      | 0.465 | 0           |
| RUVBL1    | 0.465 | 0           |
| PCTP      | 0.465 | 4.59E-11    |
| CHST10    | 0.465 | 0           |
| MXD4      | 0.465 | 0           |
| ZDHHC16   | 0.465 | 0           |
| DLG1      | 0.465 | 0           |
| ZFP14     | 0.465 | 3.89E-10    |
| PLCL2     | 0.465 | 0.003404375 |
| NSUN2     | 0.464 | 0           |
| NUP35     | 0.464 | 0           |
| DERA      | 0.464 | 0           |
| ARFRP1    | 0.464 | 0           |
| CNP       | 0.464 | 0           |
| GCDH      | 0.464 | 0           |
| CUL1      | 0.464 | 0           |
| ZFYVE27   | 0.464 | 0           |
| COL12A1   | 0.463 | 0           |
| RNASEH1   | 0.463 | 0           |
| CCDC126   | 0.463 | 8.71E-13    |
| SETBP1    | 0.463 | 3.38E-07    |
| CCDC102A  | 0.463 | 0           |
| DOPEY1    | 0.463 | 0           |
| RAD51     | 0.463 | 0           |
| PROCA1    | 0.462 | 0.000118239 |
| MAB21L2   | 0.462 | 0           |
| RPP25L    | 0.462 | 0           |
| NSD1      | 0.462 | 0           |
| PRRT3-AS1 | 0.462 | 0.005988329 |
| MMP15     | 0.462 | 0           |
| RNF165    | 0.462 | 0           |
| ANKRA2    | 0.462 | 1.01E-12    |
| SHROOM1   | 0.462 | 1.34E-09    |
| HIST2H4A  | 0.462 | 1.64E-05    |
| RTKN2     | 0.462 | 1.32E-05    |
| TKFC      | 0.461 | 0           |
| COG8      | 0.461 | 0           |
| HNF4G     | 0.461 | 0.007248736 |
| FUS       | 0.461 | 0           |

|              |       |           |
|--------------|-------|-----------|
| MTCH2        | 0.460 | 0         |
| HERC3        | 0.460 | 6.41E-12  |
| HIP1R        | 0.460 | 0         |
| STK38        | 0.460 | 0         |
| GTF3C6       | 0.460 | 0         |
| MYORG        | 0.460 | 2.88E-10  |
| IL11RA       | 0.459 | 7.56E-06  |
| LCLAT1       | 0.459 | 0         |
| CBX5         | 0.459 | 0         |
| NAGLU        | 0.459 | 0         |
| JPH1         | 0.459 | 1.55E-13  |
| METTTL15     | 0.459 | 0         |
| PGK1         | 0.459 | 0         |
| COL9A3       | 0.458 | 0         |
| TCAF1P1      | 0.458 | 0         |
| CLCN4        | 0.458 | 0         |
| RNFT1        | 0.458 | 0         |
| PRTFDC1      | 0.458 | 0         |
| LANCL1       | 0.457 | 0         |
| TTC25        | 0.457 | 0.0006927 |
| NIF3L1       | 0.457 | 2.22E-16  |
| DENND6A      | 0.457 | 0         |
| SHMT1        | 0.457 | 0         |
| PANK1        | 0.457 | 1.08E-10  |
| MAML2        | 0.457 | 0         |
| MAEA         | 0.456 | 0         |
| LACC1        | 0.456 | 2.69E-07  |
| ZBED4        | 0.456 | 0         |
| UBE2D4       | 0.456 | 0         |
| UBE2J2       | 0.456 | 0         |
| POC1B-GALNT4 | 0.455 | 1.75E-08  |
| SNHG10       | 0.455 | 2.60E-11  |
| MINDY3       | 0.455 | 0         |
| FAM227B      | 0.455 | 5.15E-06  |
| TMX3         | 0.455 | 0         |
| CDKN2B       | 0.455 | 0         |
| CENPB        | 0.455 | 0         |
| SAP30L       | 0.454 | 0         |
| CAP2         | 0.454 | 0         |
| GTF2H5       | 0.454 | 0         |
| IPO8         | 0.454 | 0         |
| MOSMO        | 0.454 | 0         |
| IGSF11       | 0.454 | 0         |
| C14ORF93     | 0.454 | 0         |
| ZNF362       | 0.453 | 0         |

|          |       |          |
|----------|-------|----------|
| PIK3R1   | 0.453 | 0        |
| SLC9A8   | 0.453 | 0        |
| HLTF     | 0.453 | 0        |
| PCK2     | 0.453 | 0        |
| GUF1     | 0.453 | 0        |
| TIMMDC1  | 0.452 | 0        |
| ABLIM1   | 0.452 | 0        |
| AASDH    | 0.452 | 0        |
| CASK     | 0.452 | 0        |
| PMS2     | 0.452 | 0        |
| GALNT18  | 0.452 | 0        |
| CEP78    | 0.452 | 0        |
| DNAJC22  | 0.452 | 1.23E-07 |
| CTNNBIP1 | 0.452 | 0        |
| TTI1     | 0.452 | 0        |
| SLC35F5  | 0.452 | 0        |
| DLC1     | 0.451 | 0        |
| ETV1     | 0.451 | 0        |
| UBLCP1   | 0.451 | 0        |
| LLPH     | 0.451 | 0        |
| ZSCAN26  | 0.451 | 0        |
| NBPF1    | 0.451 | 0        |
| MCCC2    | 0.451 | 0        |
| PPM1F    | 0.451 | 0        |
| MFSD1    | 0.450 | 0        |
| RDH10    | 0.450 | 3.28E-13 |
| ANKRD49  | 0.450 | 1.11E-16 |
| SZT2     | 0.450 | 0        |
| NCAN     | 0.450 | 0        |
| MBTPS1   | 0.450 | 0        |
| TMEM184C | 0.449 | 0        |
| ST6GAL1  | 0.449 | 0        |
| NCBP1    | 0.449 | 0        |
| ENDOD1   | 0.449 | 0        |
| FBXO36   | 0.448 | 1.74E-05 |
| SLC22A23 | 0.448 | 0        |
| TMCO6    | 0.448 | 0        |
| VPS4B    | 0.448 | 0        |
| TRIM32   | 0.448 | 0        |
| ZNF3     | 0.447 | 0        |
| PPFIBP1  | 0.447 | 0        |
| SNAPIN   | 0.447 | 0        |
| AGPAT3   | 0.447 | 0        |
| ZNF528   | 0.447 | 3.12E-11 |
| PBX1     | 0.447 | 2.33E-09 |

|            |       |             |
|------------|-------|-------------|
| STRADB     | 0.447 | 0           |
| GLDCP1     | 0.446 | 0.002659547 |
| ADAM19     | 0.446 | 0           |
| ERGIC2     | 0.446 | 0           |
| PPM1M      | 0.446 | 1.39E-06    |
| C2ORF42    | 0.446 | 0           |
| NDUFC2     | 0.446 | 0           |
| CEP192     | 0.445 | 0           |
| FAR2P2     | 0.445 | 2.55E-15    |
| SPATA33    | 0.445 | 0.009263619 |
| RCOR2      | 0.445 | 0           |
| ISLR       | 0.445 | 0.025046908 |
| ZNF507     | 0.445 | 0           |
| NKD1       | 0.445 | 0           |
| TFDP2      | 0.445 | 0           |
| TOX        | 0.445 | 0           |
| UGT8       | 0.444 | 0           |
| BRMS1L     | 0.444 | 0           |
| UBXN2B     | 0.444 | 0           |
| UNG        | 0.444 | 0           |
| FAM222B    | 0.444 | 0           |
| ZNF717     | 0.443 | 6.82E-07    |
| TLNRD1     | 0.443 | 0           |
| VPS9D1-AS1 | 0.443 | 6.22E-15    |
| LINC00174  | 0.443 | 5.09E-11    |
| ZNF202     | 0.443 | 0           |
| GFM2       | 0.442 | 0           |
| PARP3      | 0.442 | 0           |
| LINC00920  | 0.442 | 0.002177466 |
| TPCN2      | 0.442 | 0           |
| MYCN       | 0.441 | 1.58E-05    |
| ANKRD11    | 0.441 | 0           |
| NAA35      | 0.441 | 0           |
| PAOX       | 0.441 | 0.001709508 |
| PGGT1B     | 0.441 | 0           |
| FLAD1      | 0.441 | 0           |
| SLC7A8     | 0.440 | 0           |
| RRP7A      | 0.440 | 0           |
| NAE1       | 0.440 | 0           |
| AKTIP      | 0.440 | 0           |
| CREB3L4    | 0.440 | 9.66E-11    |
| TFAM       | 0.439 | 0           |
| CIP2A      | 0.439 | 0           |
| AGO1       | 0.439 | 0           |
| SIMC1      | 0.439 | 0           |



|            |       |             |
|------------|-------|-------------|
| MT3        | 0.439 | 4.24E-12    |
| C1GALT1C1  | 0.439 | 0           |
| SEMA4D     | 0.438 | 2.72E-13    |
| CCNF       | 0.438 | 0           |
| SLC25A14   | 0.438 | 2.90E-05    |
| SPRED1     | 0.438 | 0           |
| TMEM260    | 0.438 | 0           |
| ERBB2      | 0.438 | 0           |
| BMPR1A     | 0.438 | 0           |
| EPOP       | 0.438 | 0           |
| GOPC       | 0.438 | 0           |
| SLC25A20   | 0.437 | 0           |
| TTL6       | 0.437 | 0           |
| KIF13A     | 0.437 | 0           |
| PTK2B      | 0.437 | 1.63E-05    |
| DNAH9      | 0.437 | 0           |
| RFWD3      | 0.437 | 0           |
| NFE2L3     | 0.437 | 0           |
| CNPY2      | 0.437 | 0           |
| C11ORF54   | 0.437 | 0           |
| FRMD8      | 0.436 | 0           |
| ZIC2       | 0.436 | 1.77E-14    |
| ZNF736     | 0.436 | 0           |
| GSKIP      | 0.436 | 0           |
| ZNF883     | 0.436 | 0           |
| HOXD3      | 0.436 | 3.40E-13    |
| TRAF3      | 0.436 | 0           |
| MDM2       | 0.436 | 0           |
| WNT3       | 0.435 | 3.13E-05    |
| DCLRE1C    | 0.435 | 1.11E-16    |
| ERFE       | 0.435 | 0.00017335  |
| SHROOM4    | 0.435 | 0           |
| HELQ       | 0.435 | 0           |
| PITPNA     | 0.435 | 0           |
| CYB561A3   | 0.435 | 0           |
| PCDHGB3    | 0.435 | 0.001313793 |
| CDKN2AIPNL | 0.435 | 0           |
| TBCK       | 0.434 | 5.36E-13    |
| EXOSC4     | 0.434 | 0           |
| FBXL19-AS1 | 0.434 | 1.88E-09    |
| WDR17      | 0.434 | 0           |
| ITGB8      | 0.434 | 0           |
| GYG2       | 0.434 | 0.002927342 |
| ZNF713     | 0.434 | 1.11E-16    |
| ZDHHC1     | 0.434 | 0.018651188 |

|           |       |             |
|-----------|-------|-------------|
| THAP7     | 0.434 | 0           |
| CENPE     | 0.434 | 0           |
| MDFI      | 0.433 | 0           |
| FUT8      | 0.433 | 0           |
| TMEM209   | 0.433 | 0           |
| ALG11     | 0.433 | 0           |
| B3GNT5    | 0.433 | 1.03E-12    |
| MRM3      | 0.433 | 0           |
| LIMD1     | 0.433 | 0           |
| MYCL      | 0.433 | 0           |
| WDR34     | 0.432 | 0           |
| PCNX4     | 0.432 | 0           |
| NABP1     | 0.432 | 7.63E-12    |
| ATP10D    | 0.432 | 0           |
| AMER1     | 0.432 | 0           |
| TMPRSS5   | 0.432 | 3.33E-10    |
| FOXD3-AS1 | 0.432 | 2.11E-08    |
| ASF1A     | 0.432 | 0           |
| SCG3      | 0.432 | 0.001713374 |
| FAM49A    | 0.432 | 0           |
| SCRG1     | 0.432 | 0           |
| EFCAB7    | 0.432 | 1.66E-06    |
| KATNAL2   | 0.432 | 4.44E-16    |
| MFS4B     | 0.431 | 0           |
| DHX32     | 0.431 | 0           |
| KLHL23    | 0.431 | 0           |
| TMEM223   | 0.431 | 0           |
| LMTK2     | 0.431 | 0           |
| LGMN      | 0.431 | 0           |
| ZNF649    | 0.431 | 0           |
| FAM162A   | 0.430 | 0           |
| AASDHPPT  | 0.430 | 0           |
| GPR180    | 0.430 | 0           |
| KRR1      | 0.430 | 0           |
| NECTIN1   | 0.430 | 0           |
| ZNF117    | 0.430 | 7.50E-13    |
| UNC13D    | 0.430 | 0.005526805 |
| PXMP2     | 0.429 | 0           |
| GATB      | 0.429 | 0           |
| DDX52     | 0.429 | 0           |
| ORAOV1    | 0.429 | 0           |
| ZMYM1     | 0.428 | 0           |
| CRIM1     | 0.428 | 0           |
| AP3M2     | 0.428 | 0           |
| CD3EAP    | 0.428 | 6.66E-16    |

|           |       |             |
|-----------|-------|-------------|
| MANEAL    | 0.428 | 0           |
| RCN2      | 0.428 | 0           |
| RFESD     | 0.428 | 0.038212398 |
| IREB2     | 0.428 | 0           |
| SCRN3     | 0.427 | 0           |
| LDAH      | 0.427 | 0           |
| ACACB     | 0.427 | 0           |
| ARSE      | 0.427 | 3.57E-05    |
| CAMKK2    | 0.427 | 0           |
| KIAA0232  | 0.427 | 6.66E-16    |
| PRUNE1    | 0.427 | 0           |
| FBXO9     | 0.427 | 0           |
| ABCD2     | 0.426 | 0           |
| NDUFA4L2  | 0.426 | 0.003206701 |
| ZNF814    | 0.426 | 0           |
| STAG3L3   | 0.426 | 0           |
| RPGR      | 0.426 | 2.46E-14    |
| ATP11C    | 0.426 | 0           |
| TOR1B     | 0.426 | 0           |
| FAM184B   | 0.426 | 4.54E-07    |
| ZNF783    | 0.426 | 0           |
| SMG1P7    | 0.425 | 1.98E-09    |
| ZNF614    | 0.425 | 0           |
| SESN3     | 0.425 | 0           |
| RBM24     | 0.425 | 0           |
| PAQR4     | 0.425 | 0           |
| PYM1      | 0.425 | 0           |
| ZNF597    | 0.424 | 1.41E-11    |
| TMEM14A   | 0.424 | 7.66E-15    |
| MYD88     | 0.424 | 0           |
| POP4      | 0.424 | 0           |
| EVC       | 0.424 | 0           |
| GTF2IP12  | 0.423 | 0.000199869 |
| HGH1      | 0.423 | 0           |
| GNB4      | 0.423 | 0           |
| C1ORF226  | 0.423 | 2.48E-05    |
| NCEH1     | 0.422 | 0           |
| USP53     | 0.422 | 5.70E-11    |
| METTL23   | 0.422 | 0           |
| UBR1      | 0.422 | 0           |
| LRTOMT    | 0.422 | 1.44E-07    |
| IQCE      | 0.422 | 0           |
| MINPP1    | 0.422 | 4.00E-15    |
| LINC01184 | 0.422 | 0           |
| DDIT4L    | 0.422 | 0.003848836 |

|          |       |             |
|----------|-------|-------------|
| TSPYL1   | 0.421 | 0           |
| NUDT19   | 0.421 | 0           |
| RGS19    | 0.421 | 0           |
| CAV1     | 0.421 | 1.80E-08    |
| ATP6V0E2 | 0.420 | 0           |
| MOCS2    | 0.420 | 0           |
| TMEM38A  | 0.420 | 0           |
| WWTR1    | 0.420 | 0           |
| POFUT1   | 0.420 | 0           |
| EPN2     | 0.420 | 0           |
| ZNF667   | 0.420 | 0           |
| ZKSCAN4  | 0.419 | 3.40E-11    |
| KIF14    | 0.419 | 0           |
| TMOD2    | 0.419 | 0           |
| OGFRL1   | 0.419 | 0           |
| APPBP2   | 0.419 | 0           |
| ODF2L    | 0.419 | 0.00239612  |
| GFAP     | 0.419 | 0           |
| ZNF626   | 0.418 | 3.75E-05    |
| C9ORF3   | 0.418 | 0           |
| EFR3B    | 0.418 | 2.08E-10    |
| ALG10    | 0.418 | 0           |
| ZNF204P  | 0.418 | 0.008690516 |
| SLF1     | 0.418 | 0           |
| RAD51AP1 | 0.418 | 0           |
| GRIK2    | 0.418 | 0           |
| CASP8AP2 | 0.418 | 0           |
| SH3BP5L  | 0.417 | 0           |
| E2F2     | 0.417 | 0           |
| KIN      | 0.417 | 0           |
| TRAM2    | 0.417 | 0           |
| NAPEPLD  | 0.417 | 0           |
| ZNF559   | 0.417 | 0           |
| TLDC1    | 0.416 | 0           |
| ST7L     | 0.416 | 7.77E-16    |
| FECH     | 0.416 | 0           |
| BRCA2    | 0.416 | 0           |
| EED      | 0.416 | 0           |
| ANTXR2   | 0.416 | 0           |
| CDC45    | 0.416 | 0           |
| SLC38A2  | 0.416 | 0           |
| MEGF8    | 0.415 | 0           |
| CLOCK    | 0.415 | 0           |
| FKBP7    | 0.415 | 0           |
| SGK3     | 0.415 | 0           |

|                     |       |             |
|---------------------|-------|-------------|
| ARMH4               | 0.415 | 7.89E-14    |
| GEMIN6              | 0.415 | 0           |
| DDIAS               | 0.414 | 0           |
| SORBS1              | 0.414 | 0.001774047 |
| CYB561D2            | 0.414 | 0           |
| EOGT                | 0.414 | 1.11E-16    |
| USF3                | 0.414 | 0           |
| COA5                | 0.414 | 0           |
| RNF141              | 0.414 | 0           |
| CADM1               | 0.414 | 0           |
| UBXN2A              | 0.414 | 0           |
| GSAP                | 0.413 | 0           |
| EXTL2               | 0.413 | 0           |
| MRPS14              | 0.413 | 0           |
| SLC30A4             | 0.413 | 3.56E-14    |
| ANKHD1-<br>EIF4EBP3 | 0.413 | 0           |
| ZNF845              | 0.413 | 0           |
| MIA-RAB4B           | 0.413 | 0.016999217 |
| NACC2               | 0.413 | 0           |
| SLFN5               | 0.412 | 1.08E-08    |
| PIIP5K2             | 0.412 | 0           |
| RANBP6              | 0.412 | 0           |
| TAF9B               | 0.411 | 0           |
| BORCS8              | 0.411 | 0           |
| ZNF250              | 0.411 | 0           |
| MCM4                | 0.411 | 0           |
| DZIP3               | 0.411 | 0           |
| API5                | 0.411 | 0           |
| PRMT9               | 0.411 | 4.25E-14    |
| PDK3                | 0.411 | 0           |
| GIN5                | 0.410 | 0           |
| N4BP2               | 0.410 | 0           |
| PUS10               | 0.410 | 0           |
| TMOD1               | 0.410 | 0           |
| ARHGAP20            | 0.410 | 0           |
| MANEA               | 0.410 | 0           |
| TRIM14              | 0.410 | 0           |
| NPB                 | 0.410 | 0.003373144 |
| KCND2               | 0.410 | 0           |
| C5ORF15             | 0.410 | 0           |
| GNAZ                | 0.410 | 1.55E-15    |
| FAM185A             | 0.410 | 1.22E-13    |
| GPALPP1             | 0.410 | 0           |
| PHLDB1              | 0.409 | 0           |

|             |       |             |
|-------------|-------|-------------|
| OAZ2        | 0.409 | 0           |
| DEPDC1B     | 0.409 | 0           |
| INTS14      | 0.409 | 0           |
| WASHC3      | 0.409 | 0           |
| ARHGEF25    | 0.409 | 0           |
| MAML3       | 0.408 | 0           |
| UBTF        | 0.408 | 0           |
| EGLN1       | 0.408 | 0           |
| TCTN1       | 0.408 | 0           |
| GALNT10     | 0.408 | 0           |
| C5ORF24     | 0.408 | 0           |
| NCBP2-AS2   | 0.407 | 0           |
| RNASEH1-AS1 | 0.407 | 0           |
| XXYLT1      | 0.407 | 0           |
| TMEM267     | 0.407 | 3.90E-13    |
| NUP50-DT    | 0.406 | 0           |
| HMBS        | 0.406 | 0           |
| FGD5-AS1    | 0.406 | 0           |
| PIK3C2B     | 0.406 | 0           |
| CENPK       | 0.406 | 0           |
| ZNF618      | 0.406 | 0           |
| ACOT11      | 0.405 | 0.003678687 |
| CHCHD7      | 0.405 | 0           |
| BLOC1S4     | 0.405 | 0           |
| KCNIP2      | 0.405 | 0           |
| APC         | 0.405 | 0           |
| RCC2        | 0.405 | 0           |
| CLUHP3      | 0.405 | 1.45E-07    |
| TNFSF13     | 0.405 | 2.36E-06    |
| IMP3        | 0.405 | 0           |
| TOR2A       | 0.404 | 1.05E-11    |
| RECQL5      | 0.404 | 0           |
| TDRD7       | 0.404 | 0           |
| TPM3P9      | 0.404 | 0           |
| PANX1       | 0.404 | 0           |
| C4ORF3      | 0.404 | 0           |
| CYBC1       | 0.404 | 0           |
| ZNF471      | 0.404 | 0.000405453 |
| IRS1        | 0.404 | 0           |
| MCM3AP-AS1  | 0.404 | 1.01E-13    |
| TCF4        | 0.404 | 0           |
| MCAT        | 0.404 | 0           |
| PRKACB      | 0.404 | 0           |
| RAMP1       | 0.403 | 0.023011134 |
| NT5DC2      | 0.403 | 0           |

|           |       |             |
|-----------|-------|-------------|
| NIM1K     | 0.403 | 0           |
| SLC25A16  | 0.403 | 0           |
| VXN       | 0.403 | 0           |
| ATRIP     | 0.403 | 0           |
| MCM3      | 0.403 | 0           |
| TTLL1     | 0.402 | 5.12E-06    |
| TBP       | 0.402 | 0           |
| C11ORF96  | 0.402 | 0.003005939 |
| SLC2A13   | 0.402 | 0           |
| MTR       | 0.402 | 0           |
| SAPCD2    | 0.402 | 0           |
| STAG3L2   | 0.402 | 2.53E-06    |
| FASTKD3   | 0.401 | 0           |
| FRAS1     | 0.401 | 0           |
| EIF5      | 0.401 | 0           |
| NAA40     | 0.401 | 0           |
| RTKN      | 0.401 | 0           |
| NLGN1     | 0.401 | 3.61E-13    |
| COG2      | 0.401 | 0           |
| GANC      | 0.401 | 0           |
| IGFBP2    | 0.401 | 0           |
| UTP14C    | 0.401 | 0           |
| SNHG21    | 0.401 | 4.20E-06    |
| EXOC7     | 0.401 | 0           |
| RSPH3     | 0.400 | 2.43E-11    |
| MCM6      | 0.400 | 0           |
| RBM12B    | 0.400 | 0           |
| PTCH1     | 0.400 | 0           |
| MAN1B1-DT | 0.399 | 0.003119448 |
| HARBI1    | 0.399 | 0.000244834 |
| SPAG16    | 0.399 | 0           |
| WBP1L     | 0.399 | 0           |
| ZBTB1     | 0.399 | 0           |
| FUCA1     | 0.399 | 3.84E-12    |
| CDPF1     | 0.399 | 0           |
| TM2D2     | 0.399 | 0           |
| SOS2      | 0.399 | 0           |
| IPO9      | 0.398 | 0           |
| ASB1      | 0.398 | 0           |
| SUFU      | 0.398 | 0           |
| FYN       | 0.398 | 0           |
| NRARP     | 0.398 | 0           |
| ZNF70     | 0.398 | 0           |
| PELI3     | 0.398 | 8.55E-15    |
| S1PR2     | 0.398 | 0           |

|          |       |             |
|----------|-------|-------------|
| TRMT2B   | 0.397 | 0           |
| WDR73    | 0.397 | 0           |
| CCDC51   | 0.397 | 0           |
| TAF11    | 0.397 | 0           |
| EFR3A    | 0.397 | 0           |
| CDC14A   | 0.397 | 0           |
| RABL2A   | 0.397 | 8.59E-06    |
| HIBCH    | 0.397 | 0           |
| DSN1     | 0.397 | 0           |
| ZNF33B   | 0.397 | 0           |
| RNF144A  | 0.396 | 0           |
| LRFN3    | 0.396 | 0           |
| ANGEL2   | 0.396 | 0           |
| SNHG20   | 0.396 | 0           |
| ASF1B    | 0.396 | 0           |
| C2ORF27A | 0.396 | 1.39E-06    |
| FBXO10   | 0.396 | 0           |
| PHLDA1   | 0.396 | 0           |
| NKAPD1   | 0.395 | 0           |
| ZBED5    | 0.395 | 0           |
| PLEKHG2  | 0.395 | 0           |
| MTHFSD   | 0.395 | 0           |
| JRKL     | 0.395 | 0           |
| MAF      | 0.395 | 0           |
| GYS1     | 0.395 | 0           |
| SNTB1    | 0.395 | 0           |
| TCFL5    | 0.395 | 0           |
| THTPA    | 0.395 | 0           |
| CDK14    | 0.395 | 0           |
| ZNF440   | 0.394 | 4.41E-14    |
| COMMD9   | 0.394 | 0           |
| ZCCHC17  | 0.394 | 0           |
| ZNF446   | 0.394 | 0           |
| NALCN    | 0.394 | 0.015923021 |
| GATD3A   | 0.394 | 0           |
| DYNLL1   | 0.393 | 0           |
| ZNF551   | 0.393 | 1.11E-16    |
| TTC5     | 0.393 | 0           |
| ENOX2    | 0.393 | 0           |
| OLFML2A  | 0.393 | 1.93E-14    |
| CECR7    | 0.393 | 0           |
| TMEM121B | 0.393 | 5.06E-05    |
| NIPAL3   | 0.392 | 0           |
| CABLES2  | 0.392 | 2.47E-12    |
| C6ORF47  | 0.392 | 0           |



|             |       |             |
|-------------|-------|-------------|
| MCM8        | 0.392 | 0           |
| ARHGAP42    | 0.392 | 0           |
| FAM120AOS   | 0.392 | 0           |
| RHOJ        | 0.392 | 0           |
| E2F3        | 0.392 | 0           |
| MBNL1-AS1   | 0.392 | 0.021797246 |
| PEG3        | 0.392 | 2.57E-09    |
| EPDR1       | 0.391 | 0           |
| KIAA0556    | 0.391 | 0           |
| CPT1C       | 0.391 | 5.52E-05    |
| POLR2D      | 0.391 | 0           |
| GPATCH4     | 0.390 | 0           |
| THUMPD3-AS1 | 0.390 | 9.77E-15    |
| ELP6        | 0.390 | 0           |
| MATN1-AS1   | 0.390 | 0.000928547 |
| CARMIL1     | 0.390 | 0           |
| ZNF680      | 0.390 | 0           |
| PCDHGA6     | 0.390 | 4.36E-10    |
| ITGAV       | 0.390 | 0           |
| DNAJC14     | 0.389 | 0           |
| APOD        | 0.389 | 0           |
| HYAL3       | 0.389 | 4.06E-14    |
| RAB29       | 0.389 | 0           |
| MAP1A       | 0.389 | 0           |
| RGL1        | 0.389 | 0           |
| KCNK10      | 0.389 | 0           |
| FOXRED2     | 0.389 | 0           |
| TSHZ1       | 0.389 | 0           |
| KCNA2       | 0.389 | 0           |
| PTCHD1      | 0.389 | 6.04E-06    |
| MRPS28      | 0.388 | 1.35E-14    |
| RDH14       | 0.388 | 0           |
| ZNF23       | 0.388 | 0           |
| GABPB2      | 0.388 | 0           |
| FUZ         | 0.388 | 0           |
| LTBP2       | 0.388 | 0.020341641 |
| MEX3A       | 0.388 | 0           |
| WDR4        | 0.388 | 0           |
| KRIT1       | 0.388 | 0           |
| ZNF827      | 0.387 | 0           |
| ADAM22      | 0.387 | 0           |
| METAP1D     | 0.387 | 0           |
| PTCD2       | 0.387 | 0           |
| GATD3B      | 0.387 | 0           |
| LRRC20      | 0.387 | 0           |

|            |       |             |
|------------|-------|-------------|
| UNC5C      | 0.386 | 0           |
| SLC18B1    | 0.386 | 0           |
| EIF4EBP2   | 0.385 | 0           |
| HOXC13     | 0.385 | 5.43E-12    |
| UBL7-AS1   | 0.385 | 0.004440395 |
| STAG1      | 0.385 | 0           |
| ARL15      | 0.385 | 0           |
| DGCR2      | 0.384 | 0           |
| ERCC6      | 0.384 | 5.82E-12    |
| ZNF81      | 0.384 | 0           |
| ZSCAN16    | 0.384 | 5.15E-13    |
| ARL17B     | 0.384 | 0.007798561 |
| PRR14L     | 0.384 | 0           |
| MARS2      | 0.384 | 0           |
| ITPRIPL1   | 0.383 | 0           |
| STXBP4     | 0.383 | 0           |
| ZNF853     | 0.383 | 0           |
| TMEM250    | 0.383 | 0           |
| ARL6IP6    | 0.383 | 0           |
| IL16       | 0.383 | 0           |
| RNF145     | 0.383 | 0           |
| DPY19L2    | 0.383 | 5.32E-05    |
| GLCE       | 0.383 | 0           |
| ZFP30      | 0.382 | 0           |
| ZNF337     | 0.382 | 0           |
| ADAMTS1    | 0.381 | 0           |
| PMS2CL     | 0.381 | 0           |
| NDST1      | 0.381 | 0           |
| FAM27E3    | 0.381 | 0           |
| MARVELD1   | 0.381 | 0           |
| CYB561D1   | 0.381 | 0           |
| SUV39H2    | 0.381 | 0           |
| ZNF292     | 0.381 | 0           |
| MCC        | 0.381 | 0           |
| FTSJ3      | 0.380 | 0           |
| POLQ       | 0.380 | 0           |
| ZKSCAN5    | 0.380 | 0           |
| SMARCAD1   | 0.380 | 0           |
| ZNF852     | 0.380 | 9.39E-05    |
| HSPE1-MOB4 | 0.380 | 3.51E-07    |
| NCOA7      | 0.380 | 0           |
| GIMAP6     | 0.380 | 0.00026051  |
| ZNF260     | 0.380 | 0           |
| RMND5B     | 0.380 | 0           |

|                     |       |             |
|---------------------|-------|-------------|
| SUGT1P4-<br>STRA6LP | 0.379 | 0.001661478 |
| PTPRJ               | 0.379 | 0           |
| ARMC5               | 0.379 | 0           |
| TRUB1               | 0.379 | 0           |
| GSTA4               | 0.379 | 0           |
| ZNF75D              | 0.378 | 0           |
| LYPD6               | 0.378 | 0           |
| TTF2                | 0.378 | 0           |
| INHBB               | 0.378 | 2.91E-05    |
| RWDD3               | 0.378 | 4.42E-05    |
| CAVIN4              | 0.378 | 0.000674568 |
| SSH2                | 0.378 | 0           |
| VPS33A              | 0.378 | 0           |
| PPP6R3              | 0.378 | 0           |
| AMH                 | 0.377 | 7.89E-09    |
| GSEC                | 0.377 | 0.023469834 |
| FBXL19              | 0.377 | 0           |
| NEK1                | 0.377 | 0           |
| TBC1D31             | 0.377 | 0           |
| FZD4                | 0.377 | 0           |
| KCNMB4              | 0.377 | 0.000891994 |
| ZNF792              | 0.377 | 9.44E-12    |
| MAP2K4              | 0.377 | 0           |
| C2ORF74             | 0.376 | 9.66E-10    |
| TMEM200C            | 0.376 | 2.33E-15    |
| TOP2B               | 0.376 | 0           |
| PTPRD               | 0.376 | 0           |
| LRR1                | 0.376 | 0           |
| C10ORF143           | 0.376 | 0.008577247 |
| KIAA1755            | 0.376 | 0           |
| CCDC90B             | 0.376 | 0           |
| FRYL                | 0.375 | 0           |
| LMLN                | 0.375 | 0           |
| GABPB1-AS1          | 0.375 | 1.98E-09    |
| SHQ1                | 0.375 | 0           |
| ZNF510              | 0.375 | 0           |
| PTPN4               | 0.375 | 0           |
| LRRC45              | 0.375 | 0           |
| GALNT7              | 0.375 | 0           |
| DEPDC5              | 0.375 | 0           |
| ZNF30               | 0.375 | 3.89E-15    |
| RIDA                | 0.375 | 0           |
| STRA6LP             | 0.375 | 3.03E-09    |
| ATP6V0A4            | 0.375 | 1.61E-10    |

|          |       |             |
|----------|-------|-------------|
| WDR81    | 0.374 | 0           |
| TBC1D13  | 0.374 | 0           |
| TMEM107  | 0.374 | 6.97E-07    |
| MESD     | 0.374 | 0           |
| ZNF283   | 0.374 | 0           |
| TRIP13   | 0.373 | 0           |
| ANKRD44  | 0.373 | 0           |
| FKBP9    | 0.373 | 0           |
| PSMG4    | 0.373 | 0           |
| ATXN7L3B | 0.373 | 0           |
| CROCCP3  | 0.373 | 0.000158467 |
| BCAP29   | 0.372 | 0           |
| SCD5     | 0.372 | 0           |
| ALG6     | 0.372 | 0           |
| STIMATE  | 0.372 | 0           |
| GHDC     | 0.372 | 0           |
| LHX9     | 0.371 | 0.04572819  |
| KIAA0586 | 0.371 | 0           |
| ZNF395   | 0.371 | 0           |
| FOXP2    | 0.371 | 1.83E-12    |
| SNHG11   | 0.371 | 8.87E-14    |
| DHRS13   | 0.371 | 0           |
| ZSCAN30  | 0.371 | 0           |
| MAGEF1   | 0.370 | 0           |
| MVB12B   | 0.370 | 0           |
| CACNA2D1 | 0.370 | 0           |
| HLCS     | 0.370 | 0           |
| XRCC4    | 0.369 | 1.27E-08    |
| NTN1     | 0.369 | 0           |
| CHAF1B   | 0.369 | 0           |
| NUDT7    | 0.369 | 0.000922874 |
| HSPA12A  | 0.369 | 0           |
| FRG1HP   | 0.369 | 6.11E-13    |
| ADD3     | 0.368 | 0           |
| DBNL     | 0.368 | 0           |
| MGLL     | 0.368 | 0           |
| HGSNAT   | 0.368 | 0           |
| OXSM     | 0.367 | 0           |
| DUXAP9   | 0.367 | 0           |
| SOS1     | 0.367 | 0           |
| HTRA1    | 0.367 | 0           |
| ERLIN2   | 0.367 | 0           |
| P3H4     | 0.367 | 0           |
| ATP1A2   | 0.367 | 0           |
| WDR35    | 0.367 | 0           |

|              |       |             |
|--------------|-------|-------------|
| ABHD14A-ACY1 | 0.367 | 1.73E-05    |
| STARD13      | 0.367 | 0           |
| PYGO1        | 0.366 | 0           |
| RALGAPA2     | 0.366 | 0           |
| ENOSF1       | 0.366 | 0           |
| SIPA1L2      | 0.366 | 0           |
| POLA1        | 0.366 | 0           |
| LRRTM2       | 0.365 | 0.007630777 |
| LINC00294    | 0.365 | 0           |
| MPI          | 0.365 | 0           |
| DHRS11       | 0.365 | 0           |
| METTL25      | 0.364 | 7.01E-08    |
| C17ORF75     | 0.364 | 0           |
| HOXA3        | 0.363 | 0.01039296  |
| KIAA1143     | 0.363 | 0           |
| PPP3CA       | 0.363 | 0           |
| NSMCE4A      | 0.362 | 0           |
| SNHG14       | 0.362 | 0           |
| BPHL         | 0.362 | 0           |
| RPUSD2       | 0.362 | 0           |
| IFT88        | 0.362 | 0           |
| SYT15        | 0.361 | 0.022482049 |
| MRPL13       | 0.361 | 0           |
| RTL6         | 0.361 | 0           |
| DBR1         | 0.361 | 0           |
| XPA          | 0.361 | 0           |
| PDE4B        | 0.361 | 0           |
| ICE2         | 0.361 | 0           |
| ARID5B       | 0.360 | 0           |
| TP53I3       | 0.360 | 0           |
| FBXL14       | 0.360 | 0           |
| C9ORF163     | 0.360 | 0.034150915 |
| KBTBD11      | 0.360 | 4.33E-15    |
| LANCL2       | 0.360 | 0           |
| CRYBB2P1     | 0.359 | 0           |
| GTF2H2C      | 0.359 | 0           |
| CLSPN        | 0.359 | 0           |
| MTERF4       | 0.359 | 0           |
| RYR2         | 0.359 | 1.55E-15    |
| ZNF418       | 0.358 | 3.56E-12    |
| NEK4         | 0.358 | 0           |
| ADAL         | 0.358 | 0           |
| ASL          | 0.358 | 0           |
| ZNF557       | 0.358 | 0           |
| ZSCAN25      | 0.357 | 0           |

|            |       |             |
|------------|-------|-------------|
| SCN7A      | 0.357 | 0.000117132 |
| ZNF7       | 0.357 | 0           |
| DPP8       | 0.357 | 0           |
| MFN1       | 0.357 | 0           |
| ALG1       | 0.357 | 0           |
| ZNF544     | 0.357 | 0           |
| GPR161     | 0.357 | 0           |
| B9D1       | 0.356 | 0           |
| SBF2-AS1   | 0.356 | 1.87E-12    |
| COX18      | 0.356 | 0           |
| AARS2      | 0.356 | 0           |
| ZNF514     | 0.356 | 0           |
| SRGAP3     | 0.356 | 0           |
| UROS       | 0.355 | 0           |
| RHOB       | 0.355 | 0           |
| MGME1      | 0.355 | 0           |
| METTTL7B   | 0.355 | 0           |
| ATG9B      | 0.355 | 0.030192975 |
| CEP68      | 0.355 | 0           |
| CCDC138    | 0.355 | 0           |
| SELENBP1   | 0.355 | 0           |
| DDX11-AS1  | 0.354 | 0.003118095 |
| IRAK1BP1   | 0.354 | 0           |
| RXRG       | 0.354 | 6.95E-05    |
| XYLB       | 0.353 | 0.000206546 |
| FCF1P2     | 0.353 | 0.025342378 |
| NREP       | 0.353 | 0           |
| SNX19      | 0.353 | 0           |
| C11ORF95   | 0.353 | 0           |
| HIF1AN     | 0.353 | 0           |
| IL17D      | 0.352 | 0           |
| RALGPS2    | 0.352 | 0.001125935 |
| TRPM3      | 0.352 | 0           |
| NR5A2      | 0.352 | 0           |
| DLGAP1-AS1 | 0.352 | 2.98E-05    |
| TMEM117    | 0.352 | 0           |
| WRB        | 0.352 | 0           |
| NIFK-AS1   | 0.352 | 0           |
| HES1       | 0.352 | 0           |
| SPPL2A     | 0.352 | 0           |
| DCLRE1B    | 0.352 | 0           |
| RAB43      | 0.352 | 4.87E-12    |
| ZFP82      | 0.352 | 0           |
| SNHG4      | 0.352 | 0           |
| SMO        | 0.352 | 0           |

|              |       |             |
|--------------|-------|-------------|
| RAD51D       | 0.351 | 0           |
| RNF175       | 0.351 | 0           |
| CDKL5        | 0.351 | 0           |
| POLR3G       | 0.351 | 0           |
| POLR3F       | 0.351 | 0           |
| CEP83-DT     | 0.351 | 0.000981804 |
| HIST1H2AG    | 0.351 | 1.32E-10    |
| UTP20        | 0.350 | 0           |
| SARM1        | 0.350 | 0           |
| CHMP6        | 0.350 | 0           |
| SOX1         | 0.350 | 0           |
| MED22        | 0.350 | 0           |
| ZBTB38       | 0.349 | 0           |
| ACAN         | 0.349 | 0           |
| KIF1BP       | 0.349 | 0           |
| ATP5MF-PTCD1 | 0.349 | 0           |
| MRO          | 0.349 | 0           |
| HSPA2        | 0.349 | 0           |
| PTPN13       | 0.349 | 0           |
| ICMT         | 0.348 | 0           |
| DUS2         | 0.348 | 0           |
| TMEM165      | 0.348 | 0           |
| CCND3        | 0.348 | 0           |
| ZNF772       | 0.348 | 0           |
| KIAA1614     | 0.348 | 5.07E-14    |
| CUL5         | 0.348 | 0           |
| ST20-AS1     | 0.347 | 0           |
| B4GALT7      | 0.347 | 0           |
| RPTOR        | 0.347 | 0           |
| ZNF530       | 0.347 | 0           |
| FAM122B      | 0.347 | 0           |
| TYSND1       | 0.347 | 0           |
| EDEM3        | 0.347 | 0           |
| MOB3B        | 0.346 | 0           |
| SEMA6D       | 0.346 | 0           |
| ZNF517       | 0.346 | 1.96E-12    |
| ELOA-AS1     | 0.346 | 2.33E-07    |
| IRF2BPL      | 0.346 | 0           |
| DCP1B        | 0.346 | 0           |
| ENPP1        | 0.346 | 0           |
| BTBD8        | 0.345 | 1.64E-07    |
| PRDM2        | 0.345 | 0           |
| MIR4453HG    | 0.345 | 0.000133486 |
| ABCD3        | 0.345 | 0           |
| HIRA         | 0.345 | 0           |

|            |       |             |
|------------|-------|-------------|
| SYNJ2BP    | 0.345 | 0           |
| SALL2      | 0.344 | 0           |
| SNX1       | 0.344 | 0           |
| S100B      | 0.344 | 0           |
| ATP7A      | 0.344 | 0           |
| THAP10     | 0.344 | 3.81E-14    |
| ZNF839     | 0.343 | 4.92E-14    |
| MPHOSPH6   | 0.343 | 0           |
| ADPRH      | 0.343 | 4.31E-14    |
| SLC35D1    | 0.343 | 0           |
| FAM114A2   | 0.343 | 0           |
| NSL1       | 0.342 | 0           |
| LIG4       | 0.342 | 0           |
| SLITRK5    | 0.342 | 7.11E-15    |
| GAS2       | 0.342 | 4.34E-10    |
| PAPSS2     | 0.342 | 0           |
| ZNF502     | 0.341 | 1.17E-12    |
| ZNF12      | 0.341 | 2.00E-15    |
| TRADD      | 0.341 | 0           |
| ZBTB26     | 0.341 | 0           |
| KCNJ10     | 0.340 | 0           |
| GEMIN7     | 0.340 | 0           |
| LYSMD4     | 0.340 | 2.44E-11    |
| ZSCAN12P1  | 0.339 | 0.018732989 |
| FOXD2      | 0.339 | 0           |
| LINC00665  | 0.339 | 0           |
| ZMYM4      | 0.339 | 0           |
| DNAL1      | 0.338 | 0           |
| RFX5       | 0.338 | 0           |
| TRIM66     | 0.338 | 0           |
| CLGN       | 0.338 | 0           |
| TIA1       | 0.338 | 0           |
| RNASE1     | 0.338 | 0.002432845 |
| MFSD9      | 0.337 | 0           |
| ADM2       | 0.337 | 1.15E-06    |
| POP5       | 0.337 | 0           |
| FAM81A     | 0.337 | 7.67E-08    |
| CHRNA4     | 0.337 | 0.001838757 |
| RAB23      | 0.337 | 0           |
| NHSL1      | 0.337 | 0           |
| FOXD2-AS1  | 0.336 | 0           |
| STARD4-AS1 | 0.336 | 2.56E-07    |
| SRD5A3     | 0.336 | 4.90E-08    |
| GOLIM4     | 0.335 | 0           |
| ALCAM      | 0.335 | 0           |



|           |       |             |
|-----------|-------|-------------|
| ESCO2     | 0.335 | 0           |
| UHRF1     | 0.335 | 0           |
| CHL1-AS2  | 0.335 | 3.26E-08    |
| ARPIN     | 0.335 | 0           |
| SLC25A13  | 0.335 | 0           |
| SPDL1     | 0.335 | 0           |
| EIF4EBP3  | 0.334 | 7.57E-07    |
| FGF14     | 0.334 | 0.003793049 |
| AGL       | 0.334 | 0           |
| ZSWIM1    | 0.334 | 0           |
| TMEM131L  | 0.333 | 0           |
| MAPKAP1   | 0.333 | 0           |
| SRSF8     | 0.333 | 0           |
| SLC12A2   | 0.333 | 0           |
| NRGN      | 0.333 | 0.005262413 |
| HOXA13    | 0.333 | 0           |
| TTC3P1    | 0.333 | 0           |
| ASAH2     | 0.333 | 0.00372074  |
| AK4       | 0.332 | 0           |
| SLC46A1   | 0.332 | 0           |
| VAPB      | 0.332 | 0           |
| GDF10     | 0.332 | 0           |
| SMAD1     | 0.332 | 0           |
| GNG2      | 0.332 | 0           |
| ID3       | 0.332 | 0           |
| KCTD18    | 0.332 | 0           |
| ZSCAN20   | 0.331 | 0           |
| FAM198A   | 0.331 | 0           |
| FTX       | 0.331 | 8.88E-16    |
| SATB1     | 0.331 | 0           |
| THAP5     | 0.331 | 0           |
| COQ7      | 0.331 | 0           |
| SOX10     | 0.330 | 0           |
| TSEN2     | 0.330 | 0           |
| PSMA3-AS1 | 0.330 | 0           |
| RHOBTB1   | 0.330 | 0           |
| TRDMT1    | 0.330 | 0           |
| PTGFRN    | 0.330 | 0           |
| ZNF468    | 0.330 | 0           |
| HMMR      | 0.330 | 0           |
| FBF1      | 0.330 | 0           |
| POLR3B    | 0.329 | 0           |
| FMO4      | 0.329 | 2.48E-05    |
| SLC13A3   | 0.329 | 0.046366267 |
| FAM135A   | 0.329 | 0           |

|             |       |             |
|-------------|-------|-------------|
| ZNF91       | 0.329 | 0           |
| HMG3        | 0.329 | 0           |
| KCNAB1      | 0.329 | 7.58E-09    |
| LINC02119   | 0.329 | 0.01614296  |
| PCDH9       | 0.329 | 0           |
| GPAA1       | 0.329 | 0           |
| PTPRO       | 0.328 | 0           |
| ZNF20       | 0.328 | 2.26E-10    |
| NEMP2       | 0.328 | 0           |
| PGBD4       | 0.328 | 0           |
| RAPGEF2     | 0.328 | 0           |
| RMI2        | 0.328 | 0           |
| FBXL17      | 0.328 | 0           |
| METTL18     | 0.328 | 3.20E-13    |
| ZNF625      | 0.327 | 0.00064357  |
| CPSF1P1     | 0.327 | 0.000417185 |
| TIAM2       | 0.327 | 0           |
| SLC38A7     | 0.327 | 0           |
| NUDT12      | 0.326 | 0           |
| TMEM17      | 0.326 | 0.000272498 |
| UTP3        | 0.326 | 0           |
| SLC16A1-AS1 | 0.326 | 0           |
| CCDC113     | 0.326 | 0.013024062 |
| NPHP1       | 0.325 | 2.51E-08    |
| FER         | 0.325 | 0           |
| CYP2J2      | 0.325 | 6.13E-10    |
| SLC6A6      | 0.325 | 0           |
| ZNF776      | 0.325 | 0           |
| EFCAB11     | 0.324 | 0.001113709 |
| ZNF730      | 0.324 | 3.85E-06    |
| CICP14      | 0.324 | 1.69E-13    |
| ZNF169      | 0.324 | 1.98E-10    |
| NAP1L4      | 0.324 | 0           |
| EML5        | 0.323 | 8.66E-05    |
| ZNFX1       | 0.323 | 0           |
| GSPT2       | 0.323 | 0           |
| CEND1       | 0.323 | 0.000386401 |
| ZNF701      | 0.323 | 0           |
| TEX261      | 0.323 | 0           |
| SPRN        | 0.323 | 6.72E-10    |
| HNRNPM      | 0.322 | 0           |
| SNHG26      | 0.322 | 1.05E-05    |
| C12ORF66    | 0.322 | 0           |
| ASPM        | 0.322 | 0           |
| ING4        | 0.322 | 0           |

|          |       |          |
|----------|-------|----------|
| CPTP     | 0.322 | 0        |
| NTRK2    | 0.322 | 0        |
| IGF2BP3  | 0.321 | 0        |
| DOCK9    | 0.321 | 0        |
| CTRL     | 0.321 | 1.41E-05 |
| FKRP     | 0.321 | 0        |
| GPR157   | 0.321 | 0        |
| USP40    | 0.320 | 0        |
| ALG8     | 0.320 | 0        |
| EID2B    | 0.320 | 1.65E-11 |
| C15ORF40 | 0.320 | 0        |
| PKDCC    | 0.319 | 0        |
| TEFM     | 0.319 | 0        |
| DNAJC30  | 0.319 | 0        |
| SEMA4F   | 0.318 | 1.01E-14 |
| NOVA1    | 0.318 | 0        |
| TIGD1    | 0.318 | 0        |
| PRIMPOL  | 0.318 | 0        |
| ZKSCAN1  | 0.318 | 0        |
| NT5E     | 0.318 | 0        |
| MAP2     | 0.318 | 0        |
| AMIGO1   | 0.318 | 0        |
| COL5A2   | 0.318 | 2.19E-06 |
| ARSJ     | 0.318 | 0        |
| BTBD9    | 0.318 | 0        |
| PHF7     | 0.317 | 1.98E-12 |
| LMBRD2   | 0.317 | 0        |
| FAM172A  | 0.317 | 0        |
| RBM45    | 0.317 | 0        |
| ATP5S    | 0.316 | 0        |
| GPRASP2  | 0.316 | 1.90E-08 |
| PNMA8A   | 0.316 | 0        |
| PLEKHG1  | 0.316 | 0        |
| OMA1     | 0.315 | 0        |
| GLCCI1   | 0.315 | 0        |
| DAGLA    | 0.314 | 0        |
| DEGS1    | 0.314 | 0        |
| PLOD2    | 0.314 | 0        |
| MAPK4    | 0.314 | 0        |
| BBS1     | 0.314 | 0        |
| E2F8     | 0.313 | 0        |
| FZD2     | 0.313 | 0        |
| STS      | 0.313 | 0        |
| SAMHD1   | 0.313 | 0        |
| ATMIN    | 0.313 | 0        |

|            |       |             |
|------------|-------|-------------|
| SLC10A5    | 0.313 | 0.03433602  |
| PFAS       | 0.312 | 0           |
| DCAF16     | 0.312 | 0           |
| MT-ND3     | 0.312 | 0           |
| LAG3       | 0.311 | 0.019161309 |
| TADA2A     | 0.311 | 0           |
| MAP3K5     | 0.311 | 0           |
| CTSV       | 0.311 | 0.001425203 |
| ZNF337-AS1 | 0.311 | 0.026085155 |
| HSPA7      | 0.311 | 7.68E-05    |
| FANCF      | 0.311 | 0           |
| SLC7A11    | 0.311 | 0           |
| CDK6       | 0.310 | 0           |
| RPL7L1     | 0.310 | 0           |
| PCNA       | 0.310 | 0           |
| MCOLN2     | 0.310 | 0           |
| ZNF324B    | 0.310 | 0           |
| C12ORF43   | 0.310 | 0           |
| EEF1AKMT1  | 0.310 | 0           |
| GPAM       | 0.310 | 0           |
| ACSS1      | 0.310 | 0           |
| PALB2      | 0.310 | 0           |
| SLC35B4    | 0.310 | 0           |
| CCNYL1     | 0.310 | 0           |
| RBM15B     | 0.310 | 0           |
| MFSD6      | 0.309 | 0           |
| SLC25A10   | 0.308 | 0           |
| ACOX3      | 0.308 | 0           |
| CEP295     | 0.308 | 0           |
| HILS1      | 0.308 | 0           |
| ASTN1      | 0.308 | 9.70E-05    |
| DNAJC16    | 0.308 | 0           |
| CYB5D1     | 0.307 | 0           |
| ALKBH8     | 0.307 | 0           |
| PCBD2      | 0.307 | 2.27E-07    |
| RGS5       | 0.307 | 2.66E-07    |
| UEVLD      | 0.307 | 0           |
| HTD2       | 0.307 | 0           |
| FREM2      | 0.306 | 0           |
| ACAD10     | 0.306 | 0           |
| ZNF248     | 0.306 | 0           |
| DGKG       | 0.306 | 8.72E-11    |
| CSGALNACT1 | 0.305 | 0           |
| ZACN       | 0.305 | 0           |
| WNK4       | 0.305 | 0           |

|            |       |             |
|------------|-------|-------------|
| MFAP3L     | 0.305 | 0           |
| WSCD1      | 0.305 | 0           |
| UBE3B      | 0.305 | 0           |
| IFNAR1     | 0.305 | 0           |
| FRMD6      | 0.305 | 0           |
| GTF2H3     | 0.305 | 0           |
| CEP128     | 0.304 | 0           |
| DNAAF5     | 0.304 | 0           |
| GRK4       | 0.304 | 0           |
| ALG10B     | 0.303 | 0           |
| IFT80      | 0.303 | 0           |
| RRP15      | 0.303 | 0           |
| ZNF232     | 0.303 | 0           |
| FAM216A    | 0.303 | 0           |
| FZD1       | 0.303 | 0           |
| RFT1       | 0.302 | 0           |
| CPSF6      | 0.302 | 0           |
| POLR1A     | 0.302 | 0           |
| HIPK2      | 0.301 | 0           |
| ZNF519     | 0.301 | 0           |
| PARD6G     | 0.301 | 0           |
| MED11      | 0.301 | 0           |
| STX18-AS1  | 0.301 | 3.24E-05    |
| NUDT6      | 0.301 | 0           |
| BRI3BP     | 0.300 | 0           |
| HS6ST1P1   | 0.300 | 0.000109957 |
| TMX1       | 0.300 | 0           |
| WDCP       | 0.300 | 0           |
| COL11A1    | 0.300 | 0           |
| AP5B1      | 0.300 | 0           |
| C12ORF4    | 0.299 | 0           |
| ENC1       | 0.299 | 0           |
| ERBB3      | 0.299 | 0           |
| TCHP       | 0.299 | 0           |
| CTR9       | 0.299 | 0           |
| LRRC37A17P | 0.299 | 0           |
| ECHDC3     | 0.299 | 0.000274335 |
| ACADL      | 0.299 | 0.0096953   |
| ZFP90      | 0.298 | 0           |
| GGACT      | 0.298 | 0.000323719 |
| MFAP3      | 0.298 | 0           |
| SHROOM3    | 0.297 | 0           |
| ABCA8      | 0.297 | 0.020844022 |
| DET1       | 0.297 | 1.26E-12    |
| PPP2R1B    | 0.297 | 0           |

|             |       |             |
|-------------|-------|-------------|
| PRKAR1B     | 0.296 | 0           |
| MIR9-3HG    | 0.296 | 0.000731931 |
| TRIOBP      | 0.295 | 0           |
| FAM120B     | 0.295 | 0           |
| ZFP69B      | 0.295 | 0           |
| BTRC        | 0.295 | 0           |
| NEU4        | 0.295 | 0           |
| CHST12      | 0.295 | 0           |
| ZBED3       | 0.294 | 0           |
| APPL2       | 0.294 | 0           |
| SEC14L2     | 0.294 | 0           |
| THRB-AS1    | 0.294 | 0.036300912 |
| SLC35A4     | 0.294 | 0           |
| THRB        | 0.294 | 0           |
| NETO2       | 0.293 | 0           |
| CDO1        | 0.293 | 0           |
| ZBED9       | 0.292 | 9.76E-10    |
| FANCD2      | 0.292 | 0           |
| EFS         | 0.292 | 0           |
| LIMS2       | 0.292 | 1.64E-06    |
| ARMC4       | 0.292 | 0.002594905 |
| HOXA7       | 0.291 | 4.48E-12    |
| CTDSP1      | 0.291 | 0           |
| PNPO        | 0.291 | 0           |
| ZNF416      | 0.291 | 0           |
| ACY1        | 0.291 | 0           |
| RASSF2      | 0.291 | 0           |
| APOLD1      | 0.291 | 0           |
| ZNF708      | 0.291 | 0           |
| UTP23       | 0.291 | 0           |
| ZNF174      | 0.291 | 0           |
| AFAP1L2     | 0.291 | 0           |
| SLC26A4-AS1 | 0.290 | 0.000313599 |
| JPX         | 0.290 | 0           |
| RPP14       | 0.290 | 0           |
| LINC00667   | 0.290 | 0           |
| CHAC2       | 0.290 | 0           |
| TUB         | 0.290 | 0           |
| CD83        | 0.290 | 0           |
| RCBTB2      | 0.290 | 4.00E-15    |
| CBX6        | 0.289 | 0           |
| FKBP9P1     | 0.289 | 0           |
| RNF150      | 0.289 | 0           |
| TIGAR       | 0.289 | 0           |
| ZNF829      | 0.289 | 0           |

|            |       |             |
|------------|-------|-------------|
| C4ORF19    | 0.289 | 2.22E-16    |
| HEATR3     | 0.288 | 0           |
| TMEM187    | 0.288 | 0           |
| FAM86DP    | 0.288 | 0           |
| LOH12CR2   | 0.288 | 0.000517172 |
| RASGEF1C   | 0.288 | 0           |
| JRK        | 0.287 | 0           |
| TTL11      | 0.287 | 0           |
| WASHC5     | 0.287 | 0           |
| CNPY4      | 0.287 | 0           |
| RASSF8-AS1 | 0.287 | 1.57E-13    |
| PHACTR2    | 0.286 | 0           |
| GAS1       | 0.286 | 0           |
| ZNF480     | 0.286 | 0           |
| H6PD       | 0.286 | 0           |
| ACTL10     | 0.286 | 4.32E-10    |
| BEND3      | 0.286 | 0           |
| KCTD21     | 0.286 | 0           |
| PAWR       | 0.286 | 0           |
| MTND2P28   | 0.285 | 7.88E-06    |
| ZNF542P    | 0.285 | 0           |
| BORCS7     | 0.285 | 0           |
| FRG1BP     | 0.285 | 3.46E-11    |
| TECPR2     | 0.284 | 0           |
| OPRL1      | 0.284 | 0           |
| RMDN2      | 0.284 | 2.20E-07    |
| OXL1       | 0.284 | 0           |
| C17ORF67   | 0.284 | 0.020115169 |
| KCTD12     | 0.284 | 0           |
| CBR4       | 0.284 | 0           |
| STOML1     | 0.284 | 0           |
| SLC2A12    | 0.283 | 3.15E-06    |
| ZNF175     | 0.283 | 0           |
| EPHA3      | 0.283 | 0           |
| TLE6       | 0.283 | 2.21E-05    |
| CROT       | 0.283 | 0           |
| OIP5       | 0.283 | 0           |
| COL24A1    | 0.282 | 6.66E-15    |
| RIN2       | 0.282 | 0           |
| ZNF891     | 0.282 | 0           |
| SLC38A10   | 0.282 | 0           |
| TXLNB      | 0.281 | 1.11E-16    |
| TGFB3      | 0.281 | 0           |
| PDF        | 0.281 | 0           |
| GRAMD2B    | 0.281 | 0           |

|           |       |             |
|-----------|-------|-------------|
| SLC35A1   | 0.281 | 0           |
| GIN3      | 0.280 | 0           |
| KHDC1     | 0.279 | 3.74E-11    |
| SFXN5     | 0.279 | 0           |
| PGBD2     | 0.279 | 1.24E-12    |
| LINC02043 | 0.279 | 0.009304243 |
| LRRC37A4P | 0.279 | 0           |
| SEMA6A    | 0.279 | 0           |
| ADAM23    | 0.278 | 0           |
| MEF2C     | 0.278 | 0           |
| QRICH2    | 0.278 | 0           |
| IMPG2     | 0.278 | 0.042394781 |
| AP5S1     | 0.278 | 0           |
| ANKRD16   | 0.278 | 0           |
| SKP2      | 0.277 | 0           |
| ARSB      | 0.277 | 0           |
| ZNF616    | 0.277 | 0           |
| MTAP      | 0.276 | 0           |
| BCKDHB    | 0.276 | 0           |
| MAP3K1    | 0.276 | 0           |
| GAL3ST4   | 0.276 | 0           |
| PTGES3L-  |       |             |
| AARSD1    | 0.276 | 0.017910095 |
| ZBTB42    | 0.276 | 0           |
| LYPLAL1   | 0.275 | 0           |
| ERI2      | 0.275 | 0           |
| COX10-AS1 | 0.275 | 0           |
| STAG3L1   | 0.275 | 2.22E-16    |
| ZNF334    | 0.275 | 0           |
| MKL2      | 0.275 | 0           |
| PLAGL2    | 0.274 | 0           |
| LHFPL4    | 0.274 | 7.59E-10    |
| CDC42EP3  | 0.274 | 0           |
| IFT81     | 0.274 | 0           |
| LINC01011 | 0.274 | 0.016450027 |
| NPL       | 0.273 | 1.33E-13    |
| TRIM68    | 0.273 | 0           |
| SGCD      | 0.273 | 0           |
| SAMD10    | 0.273 | 2.06E-12    |
| ZNF525    | 0.272 | 0           |
| SPDYE3    | 0.272 | 2.07E-09    |
| UNC50     | 0.272 | 0           |
| GIN1      | 0.272 | 0           |
| PDGFRA    | 0.272 | 0           |
| CCDC8     | 0.271 | 0           |



|             |       |             |
|-------------|-------|-------------|
| LRRTM4      | 0.271 | 8.09E-05    |
| SPOCK1      | 0.271 | 4.80E-14    |
| ZNF345      | 0.271 | 2.57E-05    |
| MRPS18A     | 0.271 | 0           |
| SAMD5       | 0.270 | 7.77E-16    |
| PIGCP1      | 0.270 | 2.78E-15    |
| BCDIN3D-AS1 | 0.270 | 2.80E-06    |
| KCNC3       | 0.270 | 0.000294778 |
| CCDC125     | 0.270 | 0           |
| ZNF691      | 0.269 | 0           |
| BAIAP2-DT   | 0.269 | 0           |
| CPB2-AS1    | 0.269 | 0.042199926 |
| YY2         | 0.269 | 1.92E-13    |
| SMUG1       | 0.269 | 0           |
| EMILIN3     | 0.268 | 1.12E-13    |
| GEMIN4      | 0.268 | 0           |
| KLF15       | 0.268 | 0           |
| IFIT3       | 0.268 | 4.82E-07    |
| RPGRIP1L    | 0.268 | 0           |
| SEMA3A      | 0.268 | 0           |
| THAP6       | 0.268 | 0           |
| MBNL3       | 0.268 | 0           |
| SLC24A1     | 0.267 | 0           |
| SLC31A2     | 0.267 | 1.09E-07    |
| FAM187A     | 0.267 | 1.46E-08    |
| N6AMT1      | 0.267 | 0           |
| ENPP4       | 0.267 | 0           |
| RBBP9       | 0.267 | 0           |
| TTC31       | 0.266 | 0           |
| SLC43A2     | 0.266 | 0           |
| GTF2IRD2B   | 0.266 | 0           |
| ELMOD2      | 0.266 | 0           |
| HS6ST1      | 0.266 | 0           |
| CRB1        | 0.266 | 0           |
| MRM2        | 0.265 | 0           |
| ZBTB8OS     | 0.265 | 0           |
| ADGRL3      | 0.265 | 0           |
| FZD8        | 0.265 | 0           |
| APC2        | 0.265 | 0           |
| FLVCR2      | 0.265 | 0           |
| MANSC1      | 0.264 | 0           |
| UBAP1L      | 0.264 | 3.27E-05    |
| NAIP        | 0.264 | 0           |
| SPRYD4      | 0.264 | 0           |
| KLHL32      | 0.264 | 0.01095831  |

|           |       |             |
|-----------|-------|-------------|
| FAM155B   | 0.264 | 0           |
| FEN1      | 0.263 | 0           |
| HFM1      | 0.263 | 0.000324908 |
| FRMD4B    | 0.263 | 0           |
| MT-ND2    | 0.263 | 0.007563298 |
| SEPHS2    | 0.263 | 0           |
| POLE2     | 0.263 | 0           |
| NNT-AS1   | 0.263 | 0           |
| GDAP1     | 0.262 | 0           |
| ZNF646    | 0.262 | 0           |
| AP4E1     | 0.262 | 0           |
| ARSD      | 0.262 | 0           |
| TUBGCP5   | 0.262 | 0           |
| C18ORF54  | 0.261 | 0           |
| BHLHB9    | 0.261 | 2.68E-12    |
| CSRNP3    | 0.261 | 0           |
| UCN2      | 0.261 | 0.021723855 |
| TMTC4     | 0.261 | 0           |
| RBMS3     | 0.261 | 0           |
| TNFSF4    | 0.261 | 0.007166794 |
| PKD2      | 0.261 | 0           |
| TSPYL4    | 0.260 | 0           |
| SSPN      | 0.260 | 9.14E-06    |
| SRP14-AS1 | 0.260 | 0           |
| CPM       | 0.260 | 0           |
| GTF2IP13  | 0.260 | 0           |
| C19ORF57  | 0.260 | 0           |
| NDUFAF1   | 0.260 | 0           |
| FKTN      | 0.259 | 0           |
| PEX12     | 0.259 | 0           |
| DNAAF4    | 0.257 | 8.18E-05    |
| ZNF425    | 0.257 | 1.40E-11    |
| C1ORF61   | 0.257 | 0           |
| ZNF613    | 0.257 | 0           |
| GCA       | 0.257 | 0           |
| VASH1-AS1 | 0.257 | 0           |
| PPP1R3D   | 0.257 | 0           |
| WDR53     | 0.257 | 1.90E-13    |
| NBR2      | 0.257 | 2.01E-06    |
| CHAMP1    | 0.256 | 0           |
| ACADSB    | 0.256 | 0           |
| ERBB4     | 0.256 | 0           |
| DAB1      | 0.256 | 2.78E-07    |
| P2RX6     | 0.256 | 0           |
| SIRT4     | 0.256 | 1.90E-11    |

|            |       |             |
|------------|-------|-------------|
| HILPDA     | 0.256 | 0           |
| TIMP4      | 0.256 | 0           |
| PTGR2      | 0.256 | 0           |
| GPR155     | 0.256 | 0           |
| ELOVL2     | 0.255 | 0           |
| EHD3       | 0.255 | 0           |
| GVQW2      | 0.255 | 0.031055435 |
| CYP7B1     | 0.255 | 4.92E-05    |
| LRRCC1     | 0.254 | 1.39E-12    |
| PRRX1      | 0.254 | 0           |
| MBTD1      | 0.254 | 0           |
| GON7       | 0.254 | 0           |
| ARV1       | 0.254 | 0           |
| SRCIN1     | 0.254 | 1.23E-07    |
| FGF11      | 0.254 | 1.23E-06    |
| ADORA2B    | 0.254 | 3.86E-10    |
| MKKS       | 0.254 | 0           |
| ZNF688     | 0.253 | 0           |
| DTWD2      | 0.253 | 0           |
| CCT6B      | 0.253 | 3.27E-05    |
| DIDO1      | 0.253 | 0           |
| ZSCAN22    | 0.253 | 0           |
| CNTN1      | 0.253 | 0           |
| LYRM2      | 0.253 | 0           |
| UFSP1      | 0.253 | 1.10E-05    |
| CETN3      | 0.253 | 0           |
| SRR        | 0.253 | 1.66E-08    |
| SLC35A5    | 0.252 | 0           |
| REEP1      | 0.252 | 2.24E-08    |
| CEP41      | 0.252 | 0           |
| BRCA1      | 0.252 | 0           |
| TIGD3      | 0.252 | 0.000272968 |
| C5ORF63    | 0.251 | 0           |
| MDFIC      | 0.250 | 6.04E-07    |
| DENND2A    | 0.250 | 0           |
| ETAA1      | 0.250 | 0           |
| ENTPD1-AS1 | 0.249 | 0           |
| MAST4      | 0.249 | 8.16E-05    |
| LRRC26     | 0.249 | 1.51E-14    |
| SLX4IP     | 0.249 | 0           |
| NRAV       | 0.249 | 7.22E-15    |
| SPATA25    | 0.249 | 0.010913788 |
| GRIA2      | 0.248 | 0.000603065 |
| ALDH5A1    | 0.248 | 0           |
| CHKB-DT    | 0.248 | 0.032355462 |

|           |       |             |
|-----------|-------|-------------|
| TTN-AS1   | 0.247 | 0           |
| SPON1     | 0.247 | 3.56E-09    |
| ZNF285    | 0.247 | 0           |
| ZFC3H1    | 0.247 | 0           |
| SLC38A9   | 0.247 | 0           |
| LGI2      | 0.247 | 0           |
| PIGBOS1   | 0.247 | 0           |
| CTHRC1    | 0.246 | 0           |
| PKIA      | 0.246 | 0           |
| LINC00663 | 0.246 | 1.30E-11    |
| RAD51-AS1 | 0.246 | 4.16E-05    |
| PIGM      | 0.246 | 0           |
| ZNF689    | 0.246 | 0           |
| SEMA3E    | 0.246 | 0           |
| DENND1B   | 0.246 | 6.44E-12    |
| GTF2E1    | 0.245 | 0           |
| CCDC142   | 0.245 | 0           |
| MYO5C     | 0.245 | 0           |
| SFT2D3    | 0.244 | 2.22E-16    |
| C2ORF72   | 0.244 | 0           |
| GRIA4     | 0.244 | 0           |
| SEMA3D    | 0.244 | 0           |
| RPL4P6    | 0.244 | 0.038771931 |
| BTN2A3P   | 0.243 | 0           |
| BMPR1B    | 0.243 | 0           |
| ANK3      | 0.243 | 0           |
| TRMT10C   | 0.243 | 0           |
| PSPH      | 0.243 | 0           |
| ADGRV1    | 0.243 | 0           |
| CRISPLD1  | 0.243 | 0           |
| TMEM121   | 0.243 | 0           |
| TRMT1L    | 0.242 | 0           |
| TMEM19    | 0.242 | 0           |
| AQP7P1    | 0.242 | 0.002564363 |
| SLX4      | 0.241 | 0           |
| EIF3J-DT  | 0.241 | 0           |
| GRIA3     | 0.241 | 0.005029092 |
| ACTR3B    | 0.241 | 0           |
| CASP8     | 0.241 | 0.000116366 |
| SLC25A24  | 0.240 | 5.22E-11    |
| PIGV      | 0.240 | 0           |
| TIMM21    | 0.240 | 0           |
| ALOX15    | 0.240 | 0.01955787  |
| SPRY3     | 0.240 | 0.02307234  |
| SPRY3     | 0.240 | 0.02307234  |

|            |       |             |
|------------|-------|-------------|
| SLC12A6    | 0.239 | 0           |
| WBP4       | 0.239 | 0           |
| LINC01560  | 0.238 | 6.92E-05    |
| JMJD4      | 0.238 | 0           |
| LIPT2      | 0.238 | 0.010831997 |
| IFIT2      | 0.238 | 0.003497615 |
| MTBP       | 0.238 | 0           |
| IPP        | 0.237 | 0           |
| NRCAM      | 0.237 | 0           |
| FRMD4A     | 0.237 | 0           |
| BRIP1      | 0.236 | 0           |
| DENND4A    | 0.236 | 0           |
| ZNF234     | 0.236 | 0           |
| UST        | 0.236 | 0           |
| THAP2      | 0.236 | 0           |
| ANKRD46    | 0.236 | 0           |
| MPZ        | 0.236 | 0           |
| TIGD2      | 0.235 | 0           |
| FAM181B    | 0.235 | 0           |
| ZBED1      | 0.235 | 0           |
| ZBED1      | 0.235 | 0           |
| ETFBKMT    | 0.235 | 1.44E-10    |
| NCAM2      | 0.234 | 0           |
| JMJD7      | 0.234 | 0           |
| KIF24      | 0.233 | 0           |
| GABPB1-IT1 | 0.233 | 0           |
| SPRY4      | 0.233 | 0           |
| ORC6       | 0.232 | 0           |
| RBL1       | 0.232 | 0           |
| TST        | 0.232 | 0           |
| OPHN1      | 0.231 | 0           |
| GLIDR      | 0.231 | 0           |
| SCAMP5     | 0.231 | 0           |
| ITGA4      | 0.230 | 0           |
| ZNF585B    | 0.230 | 0           |
| MED18      | 0.229 | 0           |
| ASTE1      | 0.229 | 0           |
| WT1-AS     | 0.229 | 0.001533312 |
| TEX15      | 0.229 | 0           |
| CDC7       | 0.229 | 0           |
| DMRT2      | 0.229 | 0           |
| DSEL       | 0.229 | 0           |
| NICN1      | 0.229 | 0           |
| ERCC4      | 0.228 | 0           |
| ZNF112     | 0.228 | 0           |

|            |       |             |
|------------|-------|-------------|
| MMP16      | 0.228 | 0           |
| CUTALP     | 0.228 | 0           |
| C12ORF65   | 0.228 | 0           |
| MECOM      | 0.228 | 0           |
| ARRB1      | 0.228 | 2.07E-07    |
| ACADM      | 0.228 | 0           |
| YPEL1      | 0.227 | 0           |
| ITGA2      | 0.227 | 0           |
| ARMC7      | 0.227 | 0           |
| CEBPZOS    | 0.227 | 0           |
| HDX        | 0.226 | 0           |
| HOMER1     | 0.226 | 0           |
| MLYCD      | 0.226 | 0           |
| FGL2       | 0.226 | 0.015560801 |
| DICER1-AS1 | 0.225 | 2.09E-05    |
| F8A1       | 0.225 | 0           |
| TCEANC2    | 0.225 | 0           |
| ZNF696     | 0.224 | 0           |
| SLC4A4     | 0.224 | 0           |
| ZNF213-AS1 | 0.224 | 1.05E-14    |
| BRCC3      | 0.224 | 0           |
| STAC2      | 0.224 | 0           |
| TRNP1      | 0.224 | 0           |
| COL25A1    | 0.224 | 0.021289602 |
| CSTF2T     | 0.224 | 0           |
| TNS2       | 0.223 | 0           |
| SCAMP1-AS1 | 0.223 | 0           |
| GPLD1      | 0.223 | 0.007787937 |
| ZBTB11-AS1 | 0.223 | 4.29E-10    |
| SUOX       | 0.223 | 0           |
| RHBDL3     | 0.223 | 0           |
| ACP2       | 0.223 | 0           |
| MYOM1      | 0.223 | 2.65E-06    |
| ARHGEF39   | 0.223 | 0           |
| DISC1      | 0.222 | 0           |
| RIMKLA     | 0.222 | 0           |
| ITIH6      | 0.222 | 0           |
| FAM198B    | 0.222 | 0           |
| NLGN3      | 0.222 | 0           |
| PCDH10     | 0.221 | 0           |
| ZNF610     | 0.221 | 0.001408415 |
| ZIC5       | 0.221 | 0           |
| KDM4D      | 0.221 | 3.47E-07    |
| ZNF137P    | 0.221 | 0.000157634 |
| PDZD2      | 0.221 | 0           |

|            |       |             |
|------------|-------|-------------|
| BICC1      | 0.220 | 0           |
| TENM3      | 0.220 | 3.74E-09    |
| WWTR1-AS1  | 0.220 | 0.010817035 |
| OLIG2      | 0.220 | 0           |
| ZNF180     | 0.219 | 0           |
| CEMP1      | 0.219 | 2.63E-05    |
| ZMYND8     | 0.219 | 0           |
| DDX60      | 0.219 | 0.01364478  |
| ZNF200     | 0.219 | 0           |
| ZNF605     | 0.219 | 0           |
| TWNK       | 0.218 | 0           |
| LEPROT     | 0.218 | 0           |
| ANKS1A     | 0.218 | 0           |
| ZNF816     | 0.218 | 0           |
| LPAR1      | 0.218 | 0           |
| TMEM229B   | 0.218 | 0           |
| WARS2-IT1  | 0.217 | 0.01764853  |
| RWDD2B     | 0.217 | 0           |
| ZNF439     | 0.216 | 0           |
| MAN1A2     | 0.216 | 0           |
| HAPLN4     | 0.216 | 0.00323098  |
| IL10RB-DT  | 0.216 | 0           |
| FAM86B3P   | 0.216 | 0.003063328 |
| GJA1       | 0.216 | 0           |
| EDNRB      | 0.216 | 0           |
| RIOX1      | 0.216 | 0           |
| ZNF100     | 0.216 | 0           |
| APH1B      | 0.215 | 0           |
| ZCCHC24    | 0.214 | 0           |
| NLGN4X     | 0.214 | 0           |
| DHRS4-AS1  | 0.214 | 0           |
| PHOSPHO2   | 0.214 | 1.02E-07    |
| SETMAR     | 0.214 | 0           |
| ZNF561-AS1 | 0.213 | 0           |
| MFSD3      | 0.213 | 0           |
| ZNRD1ASP   | 0.213 | 0           |
| CRYM       | 0.213 | 0           |
| MTERF1     | 0.213 | 0           |
| ZNF549     | 0.213 | 0           |
| CERK       | 0.213 | 0           |
| TEX9       | 0.213 | 0           |
| TIGD7      | 0.213 | 0           |
| PCDH15     | 0.212 | 0           |
| GLB1L      | 0.212 | 0           |
| CES2       | 0.212 | 0           |

|             |       |             |
|-------------|-------|-------------|
| YAE1D1      | 0.212 | 0           |
| HDAC9       | 0.211 | 0           |
| ZNF223      | 0.211 | 0           |
| WDR5B       | 0.211 | 0           |
| TIGD4       | 0.211 | 1.48E-11    |
| ZNF554      | 0.210 | 1.26E-06    |
| ZNF543      | 0.210 | 0           |
| ZNF782      | 0.210 | 4.44E-16    |
| ADGRA3      | 0.210 | 0           |
| RNF144A-AS1 | 0.210 | 0           |
| ZNF876P     | 0.210 | 0.000180249 |
| ZNF710-AS1  | 0.210 | 0           |
| OSGEPL1     | 0.210 | 0           |
| ICK         | 0.209 | 0           |
| PCMTD2      | 0.209 | 0           |
| CHL1        | 0.209 | 0           |
| FAM86EP     | 0.209 | 0           |
| ATOH8       | 0.209 | 0           |
| MTERF2      | 0.209 | 0           |
| SLC16A9     | 0.209 | 0           |
| POLN        | 0.209 | 7.71E-10    |
| RAPGEF4     | 0.209 | 0           |
| DNAJC3-DT   | 0.208 | 3.46E-10    |
| ZSCAN32     | 0.208 | 0           |
| WDR77       | 0.208 | 0           |
| GIN1        | 0.208 | 0           |
| CYP27C1     | 0.208 | 3.33E-16    |
| PRELP       | 0.208 | 0           |
| PDE5A       | 0.207 | 1.51E-11    |
| NCDN        | 0.207 | 0           |
| C3ORF70     | 0.207 | 0           |
| ZNF45       | 0.207 | 0           |
| CYP39A1     | 0.207 | 1.25E-05    |
| EXTL1       | 0.207 | 0           |
| ZNF19       | 0.207 | 7.58E-05    |
| PLPP3       | 0.207 | 0           |
| SAYS1       | 0.207 | 0           |
| INAVA       | 0.207 | 0           |
| SELL        | 0.206 | 0.001117607 |
| HOGA1       | 0.206 | 3.98E-08    |
| PRSS12      | 0.206 | 1.13E-06    |
| TMEM163     | 0.206 | 0.006703306 |
| FAM169A     | 0.206 | 1.11E-16    |
| ZSCAN29     | 0.206 | 0           |
| F3          | 0.206 | 0           |



|           |       |             |
|-----------|-------|-------------|
| KAT2B     | 0.206 | 0           |
| LINC00339 | 0.206 | 0           |
| CENPS     | 0.206 | 0           |
| TMEM67    | 0.206 | 0           |
| LINC01291 | 0.206 | 2.55E-15    |
| TTC32     | 0.206 | 2.00E-15    |
| ZNF583    | 0.206 | 0           |
| RNASEL    | 0.205 | 0           |
| PCYOX1L   | 0.205 | 0           |
| SLC25A45  | 0.205 | 0           |
| NANOS1    | 0.205 | 1.04E-13    |
| ZNF493    | 0.205 | 0           |
| CPVL      | 0.205 | 0           |
| POGLUT1   | 0.205 | 0           |
| ZNF619    | 0.205 | 0           |
| LINC00476 | 0.205 | 9.99E-16    |
| ZNF624    | 0.204 | 5.55E-16    |
| TMEM45A   | 0.204 | 0           |
| INTS6-AS1 | 0.204 | 8.32E-13    |
| CALHM2    | 0.204 | 2.95E-07    |
| ZNF512    | 0.204 | 0           |
| ATP6V1E2  | 0.204 | 0           |
| C7ORF25   | 0.203 | 1.11E-16    |
| ST3GAL2   | 0.203 | 0           |
| PEX3      | 0.203 | 0           |
| ZNF620    | 0.203 | 0           |
| KBTBD8    | 0.203 | 0           |
| SERF1A    | 0.203 | 2.84E-06    |
| ZNF28     | 0.202 | 0           |
| ZNF436    | 0.202 | 0           |
| TMEM186   | 0.202 | 0           |
| ZNF764    | 0.202 | 0           |
| USP46-AS1 | 0.202 | 0.001938275 |
| CYP4V2    | 0.201 | 0           |
| HAS2      | 0.201 | 0           |
| B4GALT6   | 0.201 | 0           |
| TRMT12    | 0.201 | 0           |
| ZNF132    | 0.201 | 0           |
| MTFMT     | 0.201 | 0           |
| C6ORF120  | 0.201 | 0           |
| ABCB10    | 0.200 | 0           |
| ADAT1     | 0.200 | 0           |
| TMEM86A   | 0.200 | 0.00150452  |
| RHOBTB2   | 0.200 | 0           |
| CAAP1     | 0.200 | 0           |

|           |       |             |
|-----------|-------|-------------|
| RPARP-AS1 | 0.199 | 0.001190639 |
| SFXN2     | 0.199 | 0           |
| HIST1H3E  | 0.199 | 0           |
| CYB5D2    | 0.199 | 0           |
| AGFG2     | 0.199 | 0           |
| CASP6     | 0.199 | 7.05E-10    |
| ZBED5-AS1 | 0.199 | 0           |
| SHC3      | 0.198 | 0           |
| VASH1     | 0.198 | 0           |
| RMI1      | 0.198 | 0           |
| PRIMA1    | 0.198 | 0.021023393 |
| THEM4     | 0.197 | 0           |
| ZNF441    | 0.197 | 1.25E-14    |
| FAM86B1   | 0.197 | 1.57E-13    |
| ZNF682    | 0.197 | 2.33E-15    |
| NMNAT1    | 0.197 | 0           |
| ZSCAN5A   | 0.197 | 0           |
| OSR1      | 0.197 | 0           |
| C11ORF71  | 0.196 | 0           |
| PWAR6     | 0.196 | 0           |
| ANO5      | 0.196 | 0           |
| TCF19     | 0.196 | 0           |
| MLIP      | 0.195 | 0           |
| RTL8B     | 0.195 | 0           |
| CSPG5     | 0.195 | 0           |
| RGS7BP    | 0.195 | 0           |
| HOXD-AS2  | 0.194 | 1.62E-06    |
| GABRB3    | 0.194 | 0.000696624 |
| LINC00327 | 0.194 | 0           |
| MORN1     | 0.193 | 1.46E-11    |
| LINC01006 | 0.193 | 3.60E-06    |
| HSPA1L    | 0.193 | 1.73E-06    |
| RAB30-AS1 | 0.193 | 0           |
| GNAS-AS1  | 0.192 | 3.19E-06    |
| ZNF552    | 0.192 | 0           |
| ELMO1     | 0.192 | 0           |
| TUSC1     | 0.192 | 0           |
| TIRAP     | 0.192 | 1.67E-09    |
| ZC3H10    | 0.192 | 0           |
| CCDC9B    | 0.192 | 0           |
| KLRG1     | 0.191 | 1.36E-11    |
| EGR2      | 0.191 | 0           |
| SCYL3     | 0.191 | 0           |
| RPRML     | 0.190 | 0           |
| PLCXD2    | 0.190 | 1.59E-13    |

|            |       |          |
|------------|-------|----------|
| GRIK3      | 0.190 | 0        |
| TOMM40L    | 0.189 | 0        |
| TP73       | 0.189 | 2.13E-08 |
| WT1        | 0.189 | 0        |
| MMACHC     | 0.189 | 0        |
| MIR503HG   | 0.189 | 7.03E-09 |
| MRFAP1L1   | 0.189 | 0        |
| ZDBF2      | 0.189 | 1.28E-13 |
| ZNF648     | 0.189 | 0        |
| RFXAP      | 0.189 | 0        |
| BRD3OS     | 0.189 | 0        |
| SHROOM2    | 0.188 | 0        |
| PRR22      | 0.188 | 4.89E-10 |
| HUNK       | 0.188 | 0        |
| SLC30A6    | 0.188 | 0        |
| UMPS       | 0.188 | 0        |
| SPRY2      | 0.187 | 0        |
| ADAM12     | 0.187 | 0        |
| FAM122A    | 0.187 | 0        |
| TFDP1      | 0.186 | 0        |
| ZNF790     | 0.186 | 0        |
| MPP2       | 0.186 | 0        |
| TMEM203    | 0.186 | 0        |
| MYT1       | 0.186 | 0        |
| ZNF221     | 0.185 | 0        |
| CSTF3      | 0.185 | 0        |
| MPP6       | 0.185 | 0        |
| ATP2B1-AS1 | 0.185 | 0        |
| FLRT2      | 0.185 | 0        |
| FERMT1     | 0.184 | 0        |
| ZFP62      | 0.184 | 0        |
| ZNF681     | 0.184 | 0        |
| LPAR4      | 0.184 | 5.77E-10 |
| E2F7       | 0.183 | 0        |
| IFIT5      | 0.183 | 0        |
| DTD2       | 0.183 | 0        |
| AP1S3      | 0.183 | 0        |
| HAGLR      | 0.183 | 0        |
| ANGPTL4    | 0.182 | 1.76E-05 |
| SLC35E3    | 0.182 | 0        |
| AP5M1      | 0.182 | 0        |
| SERPINI1   | 0.181 | 0        |
| CNN2P3     | 0.181 | 1.46E-10 |
| PEX5L      | 0.181 | 1.20E-09 |
| RGR        | 0.181 | 1.78E-12 |

|           |       |             |
|-----------|-------|-------------|
| DHFR      | 0.181 | 0           |
| LRRC4     | 0.181 | 1.23E-07    |
| GPR37L1   | 0.180 | 0           |
| LINC00963 | 0.180 | 0           |
| ASB13     | 0.180 | 0           |
| ZNF512B   | 0.179 | 0           |
| SLC1A1    | 0.178 | 0           |
| ST6GAL2   | 0.178 | 1.27E-14    |
| LINC00310 | 0.178 | 3.71E-05    |
| CLEC18B   | 0.178 | 0.018866423 |
| C6ORF203  | 0.178 | 0           |
| HIST2H3C  | 0.178 | 0.002012384 |
| ZSWIM3    | 0.177 | 0           |
| MGAT2     | 0.177 | 0           |
| EPB41L4A  | 0.177 | 3.53E-09    |
| TBC1D30   | 0.177 | 0           |
| KBTBD7    | 0.177 | 0           |
| ZIK1      | 0.177 | 0           |
| THNSL1    | 0.177 | 0           |
| RGCC      | 0.177 | 0           |
| CYB5RL    | 0.176 | 0           |
| RIPK1     | 0.176 | 0           |
| CYP2R1    | 0.176 | 0           |
| C2ORF68   | 0.176 | 0           |
| TRMT61B   | 0.176 | 0           |
| TMEM129   | 0.175 | 0           |
| CHST14    | 0.175 | 0           |
| AGGF1     | 0.175 | 0           |
| STUM      | 0.175 | 4.07E-11    |
| IQCH-AS1  | 0.175 | 0           |
| ARL6      | 0.174 | 0           |
| ZNF497    | 0.174 | 4.55E-14    |
| SLC26A2   | 0.174 | 0           |
| LINC01719 | 0.174 | 2.48E-06    |
| FPGT      | 0.174 | 0           |
| CTSO      | 0.173 | 0           |
| TCTA      | 0.173 | 0           |
| ARRDC4    | 0.173 | 0           |
| FUT4      | 0.173 | 0           |
| HERC6     | 0.173 | 5.58E-09    |
| H1FX-AS1  | 0.172 | 6.17E-06    |
| MSRB3     | 0.172 | 0           |
| HCG18     | 0.172 | 0           |
| CD82      | 0.171 | 0           |
| ZFPM2     | 0.171 | 1.57E-10    |

|             |       |             |
|-------------|-------|-------------|
| RAB9B       | 0.171 | 3.79E-12    |
| BOLA1       | 0.171 | 0           |
| ZBED3-AS1   | 0.170 | 3.87E-14    |
| TSSK6       | 0.170 | 8.09E-08    |
| LINC00526   | 0.170 | 0           |
| FIGNL1      | 0.170 | 0           |
| ST7-AS1     | 0.169 | 0           |
| ZNF655      | 0.169 | 0           |
| ZNF268      | 0.169 | 0           |
| GUCY1A2     | 0.169 | 0           |
| ZNF501      | 0.169 | 0           |
| PDE2A       | 0.169 | 7.09E-09    |
| RGS17       | 0.169 | 1.03E-07    |
| ZNF774      | 0.169 | 4.10E-11    |
| ZNF804A     | 0.169 | 0           |
| CDH20       | 0.168 | 0           |
| KCTD21-AS1  | 0.168 | 1.15E-05    |
| CERKL       | 0.168 | 0           |
| OTUD6B-AS1  | 0.168 | 0           |
| CORO7-PAM16 | 0.168 | 7.97E-13    |
| SLC2A10     | 0.168 | 0           |
| GHET1       | 0.168 | 0.000157948 |
| HYLS1       | 0.168 | 1.67E-11    |
| ZNF235      | 0.167 | 0           |
| TMTC3       | 0.167 | 0           |
| POLR3H      | 0.167 | 0           |
| MAFG-DT     | 0.167 | 0           |
| MEGF10      | 0.166 | 0           |
| TMEM140     | 0.166 | 0           |
| SOX21-AS1   | 0.165 | 0           |
| FRRS1       | 0.165 | 7.39E-07    |
| TRAF3IP1    | 0.165 | 0           |
| TRIM45      | 0.165 | 0           |
| C17ORF80    | 0.164 | 0           |
| SHC4        | 0.164 | 0           |
| RWDD2A      | 0.164 | 0           |
| KLHDC8A     | 0.164 | 0           |
| BBS10       | 0.164 | 0           |
| PRKG1       | 0.163 | 0           |
| ANKRD18EP   | 0.163 | 0           |
| ALG14       | 0.163 | 0           |
| ZNF319      | 0.163 | 0           |
| GPR27       | 0.162 | 2.29E-09    |
| LGR5        | 0.162 | 0           |
| SEPT7-AS1   | 0.162 | 1.44E-09    |

|           |       |             |
|-----------|-------|-------------|
| DARS2     | 0.162 | 0           |
| HMG3-AS1  | 0.162 | 0.002937626 |
| NLRX1     | 0.162 | 0           |
| IGLV5-52  | 0.162 | 0.000484307 |
| PIGW      | 0.162 | 0           |
| MR1       | 0.162 | 0           |
| ZNF780B   | 0.161 | 0           |
| ACKR3     | 0.160 | 0           |
| FAM208A   | 0.160 | 0           |
| LIFR-AS1  | 0.160 | 0           |
| KLHL14    | 0.160 | 0           |
| BIVM      | 0.159 | 0           |
| SUMF1     | 0.159 | 0           |
| LINC00205 | 0.159 | 0           |
| CPED1     | 0.159 | 5.24E-07    |
| FHDC1     | 0.158 | 0           |
| MRM1      | 0.158 | 0           |
| TOB1-AS1  | 0.158 | 1.71E-09    |
| ABCD1     | 0.158 | 0           |
| MAP2K6    | 0.157 | 0           |
| SLC19A3   | 0.157 | 0           |
| FMO5      | 0.157 | 3.88E-10    |
| ZNF107    | 0.156 | 0           |
| IKZF2     | 0.156 | 2.49E-13    |
| TUBD1     | 0.156 | 0           |
| CARF      | 0.155 | 0           |
| SNX22     | 0.155 | 0           |
| TRIM2     | 0.155 | 0           |
| ZNF781    | 0.155 | 3.23E-11    |
| XK        | 0.155 | 1.82E-05    |
| PAFAH2    | 0.155 | 0           |
| SKIDA1    | 0.154 | 0           |
| ZNF786    | 0.154 | 0           |
| NR2F2     | 0.154 | 0.000233837 |
| TIGD6     | 0.154 | 0           |
| ZKSCAN7   | 0.153 | 0           |
| MLH3      | 0.153 | 0           |
| KRBA2     | 0.153 | 6.00E-15    |
| LINC01089 | 0.153 | 0           |
| AMMECR1   | 0.153 | 0           |
| PAN3-AS1  | 0.152 | 2.63E-06    |
| KDM8      | 0.152 | 0           |
| GPR12     | 0.151 | 0           |
| FANCL     | 0.151 | 0           |
| ZNF79     | 0.151 | 0           |

|            |       |             |
|------------|-------|-------------|
| DDX28      | 0.150 | 0           |
| ZNF737     | 0.150 | 0           |
| TMEM102    | 0.150 | 0.034825491 |
| C2ORF16    | 0.149 | 0           |
| BEST3      | 0.149 | 3.33E-16    |
| FICD       | 0.149 | 0           |
| PUS7L      | 0.149 | 0           |
| TIGD5      | 0.148 | 0           |
| SLC25A1P5  | 0.148 | 0.033142433 |
| ZNF623     | 0.148 | 0           |
| ADGRL2     | 0.148 | 1.64E-12    |
| SOX5       | 0.148 | 0           |
| FAM86C2P   | 0.148 | 0           |
| DUSP19     | 0.148 | 0           |
| ZNF599     | 0.147 | 0           |
| NCK1-DT    | 0.147 | 1.08E-10    |
| ZNF778     | 0.146 | 0           |
| DCLRE1A    | 0.146 | 0           |
| ARHGAP31   | 0.146 | 0           |
| LPP-AS2    | 0.146 | 0.000616769 |
| FGF14-AS2  | 0.145 | 2.64E-07    |
| BBS12      | 0.145 | 0           |
| TMCC1-AS1  | 0.145 | 0           |
| ASB5       | 0.145 | 1.08E-05    |
| PEX11A     | 0.145 | 3.35E-13    |
| TNRC6C-AS1 | 0.145 | 0           |
| TNR        | 0.145 | 0           |
| LINC00467  | 0.145 | 0           |
| WAC-AS1    | 0.145 | 0           |
| TMEM169    | 0.145 | 0           |
| TMEM80     | 0.144 | 0           |
| EFCAB5     | 0.144 | 1.88E-12    |
| EGLN3      | 0.144 | 0           |
| GIN54      | 0.143 | 0           |
| DISP1      | 0.143 | 0           |
| LINC00641  | 0.143 | 0           |
| CCDC18     | 0.143 | 0           |
| CKMT2-AS1  | 0.142 | 0           |
| ZNF587B    | 0.142 | 0           |
| ZNF607     | 0.142 | 0           |
| HOXB13     | 0.142 | 0           |
| CHRNA2     | 0.142 | 9.55E-15    |
| WDR31      | 0.142 | 0           |
| POSTN      | 0.142 | 2.00E-05    |
| TGFBR2     | 0.142 | 0           |

|           |       |             |
|-----------|-------|-------------|
| SWSAP1    | 0.141 | 1.70E-08    |
| INKA2     | 0.141 | 0           |
| DCC       | 0.141 | 0           |
| CEP19     | 0.141 | 0           |
| KIF26B    | 0.141 | 0           |
| C17ORF100 | 0.141 | 0.000287678 |
| CARD6     | 0.141 | 5.88E-15    |
| ZNF606    | 0.140 | 0           |
| BMP6      | 0.140 | 0           |
| F8A3      | 0.140 | 2.94E-08    |
| EFNB2     | 0.140 | 0           |
| LYRM7     | 0.140 | 0           |
| FAM69C    | 0.140 | 0           |
| GUSBP1    | 0.140 | 0           |
| OLIG1     | 0.140 | 0           |
| ZNF253    | 0.139 | 0           |
| TTC26     | 0.139 | 0           |
| ERVK13-1  | 0.139 | 7.38E-13    |
| ZNF780A   | 0.139 | 0           |
| GSN-AS1   | 0.139 | 2.82E-05    |
| RIPOR2    | 0.139 | 0           |
| ZNF252P   | 0.138 | 0           |
| CCDC121   | 0.138 | 0           |
| TMEM255A  | 0.138 | 0           |
| CYP26B1   | 0.138 | 0           |
| RSPH9     | 0.138 | 6.02E-08    |
| TMEM198B  | 0.137 | 0           |
| TMEM26    | 0.137 | 0           |
| ZNF611    | 0.136 | 0           |
| TMPO-AS1  | 0.136 | 0           |
| PPP2R2B   | 0.136 | 0           |
| SH3TC2    | 0.136 | 7.06E-13    |
| ZNF354C   | 0.136 | 0           |
| PLPP6     | 0.135 | 0           |
| CEP162    | 0.135 | 0           |
| TPI1P2    | 0.135 | 6.25E-07    |
| GHR       | 0.135 | 0           |
| CADM2     | 0.134 | 0           |
| FADD      | 0.134 | 0           |
| MAGI2     | 0.133 | 0           |
| OBSL1     | 0.133 | 0           |
| HOMEZ     | 0.132 | 0           |
| ZNF660    | 0.132 | 0           |
| CPLANE2   | 0.131 | 0           |
| EID2      | 0.131 | 0           |



|           |       |             |
|-----------|-------|-------------|
| SCN1A     | 0.131 | 0           |
| SCUBE3    | 0.130 | 0           |
| KRT8P12   | 0.130 | 0           |
| SLC40A1   | 0.129 | 0           |
| FAM217B   | 0.129 | 0           |
| UNC80     | 0.129 | 0           |
| LUZP2     | 0.128 | 0           |
| ZKSCAN2   | 0.127 | 0           |
| WDR92     | 0.127 | 0           |
| DOK3      | 0.127 | 1.97E-09    |
| FAM78A    | 0.127 | 0           |
| SVIL      | 0.127 | 0           |
| DCX       | 0.126 | 0           |
| CYREN     | 0.126 | 0           |
| PCDH18    | 0.126 | 0           |
| PAQR8     | 0.125 | 0           |
| ADAMTS12  | 0.125 | 0           |
| GVQW3     | 0.125 | 0           |
| LINC01301 | 0.124 | 2.26E-05    |
| CCNE2     | 0.124 | 0           |
| SATB2-AS1 | 0.123 | 8.83E-08    |
| ZNF573    | 0.123 | 0           |
| XRCC2     | 0.123 | 0           |
| SULF2     | 0.123 | 1.11E-15    |
| ZNF813    | 0.123 | 0           |
| KITLG     | 0.122 | 7.00E-10    |
| C22ORF46  | 0.122 | 0           |
| GEN1      | 0.122 | 0           |
| ZNF41     | 0.122 | 0           |
| LINC00863 | 0.121 | 0           |
| ETNPPL    | 0.121 | 2.59E-05    |
| HIST2H4B  | 0.121 | 0           |
| ZNF181    | 0.121 | 0           |
| TSHR      | 0.120 | 0           |
| SP2-AS1   | 0.119 | 5.50E-08    |
| MASP2     | 0.119 | 0.037137376 |
| LDLRAD4   | 0.118 | 0           |
| ADGRD1    | 0.118 | 0           |
| PDE3B     | 0.117 | 0           |
| ZNF382    | 0.116 | 0           |
| FAM173B   | 0.116 | 0           |
| NOG       | 0.115 | 0           |
| C2ORF81   | 0.115 | 0           |
| ZNF225    | 0.115 | 0           |
| RTN4IP1   | 0.115 | 0           |

|            |       |             |
|------------|-------|-------------|
| COL2A1     | 0.115 | 0           |
| SYT12      | 0.115 | 0.000851378 |
| THBS1      | 0.114 | 0           |
| C14ORF132  | 0.114 | 0           |
| ZKSCAN3    | 0.113 | 0           |
| DUXAP8     | 0.113 | 0           |
| TMEM150C   | 0.113 | 0           |
| KAT14      | 0.112 | 0           |
| ZFP41      | 0.112 | 0           |
| ZNF189     | 0.112 | 0           |
| C21ORF58   | 0.112 | 0           |
| NAT1       | 0.111 | 0           |
| CHN2       | 0.111 | 0           |
| CNTN5      | 0.111 | 1.37E-09    |
| CFAP44     | 0.111 | 0           |
| PYCR3      | 0.111 | 0           |
| RNF170     | 0.110 | 0           |
| ZNF436-AS1 | 0.110 | 0           |
| ZNF629     | 0.110 | 0           |
| VWA1       | 0.109 | 0           |
| ZNF124     | 0.109 | 0           |
| NBPF3      | 0.109 | 0           |
| C12ORF60   | 0.108 | 0           |
| ZNF239     | 0.107 | 0           |
| FIBIN      | 0.107 | 0           |
| ZBTB9      | 0.106 | 0           |
| SEC14L5    | 0.106 | 0           |
| ZNF837     | 0.106 | 4.44E-16    |
| ABAT       | 0.104 | 0           |
| WNT5A      | 0.104 | 6.00E-15    |
| FBXO48     | 0.103 | 3.66E-11    |
| FGD3       | 0.103 | 1.14E-10    |
| KY         | 0.102 | 0           |
| NDP        | 0.102 | 0           |
| SENP8      | 0.102 | 0           |
| CPT2       | 0.102 | 0           |
| GXYLT1P4   | 0.102 | 1.12E-10    |
| ROBO2      | 0.101 | 0           |
| ITGA9      | 0.101 | 0           |
| NKX3-1     | 0.101 | 7.11E-15    |
| BDNF-AS    | 0.100 | 4.77E-09    |
| ZNF572     | 0.099 | 0           |
| SOX21      | 0.099 | 0           |
| CLBA1      | 0.098 | 0           |
| CHTF8      | 0.097 | 0           |

|              |       |             |
|--------------|-------|-------------|
| IPCEF1       | 0.096 | 0           |
| EHHADH       | 0.096 | 0           |
| CA2          | 0.096 | 3.02E-08    |
| ARHGEF37     | 0.095 | 0           |
| PPFIA4       | 0.095 | 1.94E-08    |
| RGS8         | 0.095 | 7.58E-09    |
| NUTM2D       | 0.095 | 0.018702328 |
| SCN3A        | 0.095 | 0           |
| FRAT1        | 0.094 | 0           |
| ZNF546       | 0.094 | 0           |
| CALCRL       | 0.092 | 0           |
| AKAP7        | 0.092 | 0           |
| TTC30A       | 0.092 | 0           |
| GPR37        | 0.092 | 0           |
| FAM86C1      | 0.092 | 0           |
| INTS5        | 0.091 | 0           |
| TTPAL        | 0.091 | 0           |
| SMOC1        | 0.091 | 0           |
| TTPA         | 0.091 | 1.27E-10    |
| UBAC2-AS1    | 0.091 | 2.22E-16    |
| ATP10B       | 0.091 | 0           |
| ZNF347       | 0.090 | 0           |
| GXYLT1P6     | 0.089 | 0           |
| SAMD9        | 0.088 | 0           |
| REP15        | 0.087 | 2.35E-14    |
| RNF224       | 0.087 | 0.003963414 |
| LNP1         | 0.087 | 0           |
| GRIN1        | 0.087 | 0           |
| F5           | 0.087 | 0           |
| COL9A1       | 0.087 | 0           |
| ZC3H4        | 0.086 | 0           |
| ZNF236-DT    | 0.086 | 1.05E-05    |
| LINC02473    | 0.086 | 0           |
| NCOA5        | 0.086 | 0           |
| PUDP         | 0.086 | 0           |
| RBMS3-AS3    | 0.084 | 8.78E-07    |
| PYGM         | 0.084 | 7.48E-13    |
| JAKMIP1      | 0.083 | 8.22E-15    |
| TTC30B       | 0.083 | 0           |
| LINC00654    | 0.083 | 2.34E-08    |
| LINC01410    | 0.082 | 4.06E-06    |
| BRINP2       | 0.082 | 5.62E-06    |
| ZNF37A       | 0.082 | 0           |
| PPP1R12A-AS1 | 0.081 | 6.26E-12    |
| EXOC3-AS1    | 0.081 | 0           |

|             |       |             |
|-------------|-------|-------------|
| SLC9A3      | 0.079 | 0           |
| PPP1R10     | 0.079 | 0           |
| OSTN        | 0.079 | 8.91E-11    |
| PNMA8C      | 0.079 | 0           |
| CCDC71      | 0.078 | 0           |
| GALNT3      | 0.078 | 0           |
| ZNF287      | 0.078 | 0           |
| SLC26A4     | 0.075 | 0           |
| DUX4L50     | 0.075 | 0           |
| INHA        | 0.075 | 1.01E-11    |
| CLEC18A     | 0.075 | 0           |
| DPY19L2P2   | 0.075 | 0           |
| POP1        | 0.074 | 0           |
| ZNF879      | 0.074 | 0           |
| GDPGP1      | 0.074 | 0           |
| SLX1B       | 0.073 | 5.21E-08    |
| ZNF75A      | 0.072 | 0           |
| PPP1R3G     | 0.072 | 1.45E-09    |
| DOLK        | 0.071 | 0           |
| STEAP1      | 0.070 | 0.003637332 |
| MBLAC2      | 0.070 | 0           |
| ELAC1       | 0.069 | 0           |
| SOWAHA      | 0.068 | 7.05E-11    |
| LINC01521   | 0.067 | 0           |
| PDGFD       | 0.067 | 0           |
| ZNF658      | 0.066 | 0           |
| MOCS3       | 0.065 | 0           |
| TMEM147-AS1 | 0.065 | 0           |
| PSKH1       | 0.065 | 0           |
| PARS2       | 0.064 | 0           |
| ZBED8       | 0.064 | 0           |
| CYSRT1      | 0.064 | 1.05E-08    |
| C1ORF74     | 0.064 | 0           |
| LINC01963   | 0.063 | 0           |
| ZNF658B     | 0.062 | 4.44E-11    |
| SOX2-OT     | 0.062 | 0           |
| FAM200A     | 0.060 | 0           |
| TMEM177     | 0.059 | 0           |
| LINC00235   | 0.059 | 1.08E-12    |
| EBF3        | 0.058 | 0           |
| CENPBD1     | 0.058 | 0           |
| HPS6        | 0.057 | 0           |
| ZNF37BP     | 0.056 | 0           |
| DHFR2       | 0.056 | 0           |
| KRCC1       | 0.056 | 0           |

|              |       |          |
|--------------|-------|----------|
| HOXD8        | 0.053 | 2.22E-16 |
| ZNF429       | 0.053 | 0        |
| THAP7-AS1    | 0.053 | 4.62E-12 |
| NTSR1        | 0.052 | 0        |
| LINC01828    | 0.052 | 0        |
| PRMT6        | 0.051 | 0        |
| KCNK2        | 0.051 | 0        |
| RHPN1-AS1    | 0.051 | 0        |
| ZFP3         | 0.051 | 0        |
| FLRT3        | 0.050 | 0        |
| CCDC13-AS1   | 0.049 | 9.86E-09 |
| CTBP1-DT     | 0.049 | 0        |
| DDX11L2      | 0.049 | 1.25E-12 |
| CXXC4        | 0.048 | 6.55E-11 |
| FAM111B      | 0.047 | 0        |
| PNMA8B       | 0.046 | 0        |
| SAMMSON      | 0.045 | 0        |
| MGP          | 0.045 | 0        |
| PROM1        | 0.043 | 0        |
| JCAD         | 0.042 | 0        |
| CCDC39       | 0.042 | 7.23E-14 |
| GPR17        | 0.042 | 0        |
| B3GALT6      | 0.041 | 0        |
| ZNF488       | 0.041 | 0        |
| MIR210HG     | 0.041 | 1.62E-12 |
| ZNF302       | 0.040 | 0        |
| DNAH11       | 0.040 | 0        |
| PSMG3-AS1    | 0.039 | 0        |
| LINC00680    | 0.038 | 0        |
| LINC00909    | 0.036 | 0        |
| IPO5P1       | 0.036 | 0        |
| BCDIN3D      | 0.035 | 0        |
| LCMT2        | 0.035 | 0        |
| TRIL         | 0.034 | 0        |
| B3GNT10      | 0.034 | 0        |
| ABHD15       | 0.030 | 0        |
| EGR1         | 0.029 | 0        |
| PDE7B        | 0.029 | 0        |
| ATP6V0E2-AS1 | 0.025 | 0        |
| PDE4C        | 0.025 | 0        |
| APLN         | 0.024 | 0        |
| HAPLN1       | 0.023 | 0        |
| PCDH20       | 0.022 | 0        |
| ESPN         | 0.020 | 1.55E-15 |
| SLC16A3      | 0.020 | 0        |

|         |       |   |
|---------|-------|---|
| DUSP6   | 0.019 | 0 |
| MYLK4   | 0.019 | 0 |
| MAP10   | 0.018 | 0 |
| FAM86JP | 0.018 | 0 |
| STC1    | 0.016 | 0 |
| PRSS35  | 0.013 | 0 |

**Table S3. Changes in organic acids, acylcarnitines and amino acids upon SN treatment of GSC TS543 and mouse astrocytes. (\* significant change)**

| <b>Organic acids</b> | <b>GSC TS543</b>             |                | <b>Mouse astrocytes</b>      |                |
|----------------------|------------------------------|----------------|------------------------------|----------------|
|                      | <b>Fold change (SN/DMSO)</b> | <b>p-value</b> | <b>Fold change (SN/DMSO)</b> | <b>p-value</b> |
| Citrate              | *0.63                        | 3.7E-03        | 0.73                         | 2.4E-01        |
| Lactate              | *2.08                        | 1.9E-02        | 0.60                         | 8.5E-02        |
| alpha-KG             | *1.89                        | 6.4E-03        | NA                           | NA             |
| Fumarate             | 1.11                         | 2.2E-01        | 1.55                         | 6.0E-02        |
| Pyruvate             | 0.92                         | 4.4E-01        | 1.00                         | 9.9E-01        |
| Succinate            | 1.07                         | 6.4E-01        | NA                           | NA             |

| Acylcarnitines    | GSC TS543             |          | Mouse astrocytes      |          |
|-------------------|-----------------------|----------|-----------------------|----------|
|                   | Fold change (SN/DMSO) | p-value  | Fold change (SN/DMSO) | p-value  |
| C2                | *0.66                 | 2.80E-02 | 0.88                  | 5.10E-01 |
| C3                | *0.2                  | 1.50E-03 | 0.37                  | 5.30E-02 |
| C5:1              | *0.58                 | 8.90E-03 | NA                    | NA       |
| C5                | *0.13                 | 2.80E-04 | 0.42                  | 5.80E-02 |
| C4-OH             | 0.87                  | 5.90E-01 | 1.45                  | 1.80E-01 |
| C5-OH/C3-DC       | *0.4                  | 2.40E-03 | *0.49                 | 2.90E-02 |
| C4-DC,C6-OH       | 0.66                  | 1.40E-01 | 0.87                  | 5.90E-01 |
| C5-DC             | 1.24                  | 1.80E-01 | 1.18                  | 1.10E-01 |
| C8:1-OH/C6:1-DC   | 0.84                  | 3.80E-01 | 1.05                  | 7.60E-01 |
| C8-OH/C6-DC       | 0.78                  | 2.30E-01 | 1.12                  | 4.40E-01 |
| C8-DC             | *0.45                 | 4.30E-02 | *1.5                  | 2.50E-02 |
| C12:1             | 2.05                  | 5.50E-02 | NA                    | NA       |
| C12               | *2.16                 | 4.20E-03 | NA                    | NA       |
| C12:1-OH          | 0.6                   | 1.50E-01 | 1.36                  | 1.20E-01 |
| C12-OH/C10-DC     | *0.39                 | 8.90E-03 | *2.28                 | 2.10E-02 |
| C14:1             | 1.49                  | 1.50E-01 | *2.08                 | 2.10E-02 |
| C14               | *6.62                 | 1.80E-03 | *2.2                  | 2.70E-03 |
| C14:3-OH/C12:3-DC | 2.89                  | 5.20E-02 | NA                    | NA       |
| C14:1-OH          | 0.77                  | 3.00E-01 | 2.06                  | 7.20E-02 |
| C14-OH/C12-DC     | *0.34                 | 1.90E-03 | *3.11                 | 8.60E-04 |
| C16:2             | 0.81                  | 3.30E-01 | *3.03                 | 3.00E-02 |
| C16:1             | *7.21                 | 3.30E-02 | *2.65                 | 6.40E-03 |
| C16               | *12.73                | 2.80E-03 | *2.39                 | 4.20E-03 |
| C16:2-OH          | 1.16                  | 6.50E-01 | NA                    | NA       |
| C16:1-OH/C14:1-DC | 1                     | 9.90E-01 | *2.97                 | 1.40E-02 |
| C16-OH            | 0.8                   | 5.70E-02 | *2.56                 | 2.30E-03 |
| C18:2             | 2.6                   | 1.10E-01 | *2.41                 | 3.60E-02 |
| C18:1             | *20.16                | 3.00E-02 | *2.13                 | 2.30E-02 |
| C18               | *13.35                | 5.40E-03 | NA                    | NA       |
| C18:3-OH/C16:3-DC | 0.93                  | 7.20E-01 | NA                    | NA       |
| C18:2-OH/C16:2-DC | 0.76                  | 2.10E-01 | *2.37                 | 3.40E-02 |
| C18:1-OH/C16:1-DC | *1.94                 | 4.70E-02 | *3.27                 | 2.00E-02 |
| C18-OH/C16-DC     | 0.95                  | 3.30E-01 | *2.14                 | 1.90E-02 |
| C20:3             | 0.66                  | 1.80E-01 | NA                    | NA       |



| Amino acids | GSC TS543             |         | Mouse astrocytes      |         |
|-------------|-----------------------|---------|-----------------------|---------|
|             | Fold change (SN/DMSO) | p value | Fold change (SN/DMSO) | p value |
| Val         | *1.55                 | 7.2E-03 | 1.01                  | 9.5E-01 |
| Leu         | *1.64                 | 3.0E-03 | 1.01                  | 9.6E-01 |
| Ile         | *1.74                 | 1.1E-03 | 1.04                  | 6.7E-01 |
| Met         | *1.31                 | 1.1E-03 | 0.99                  | 9.6E-01 |
| His         | *1.61                 | 1.8E-03 | 0.98                  | 8.5E-01 |
| Phe         | *1.50                 | 7.2E-03 | 1.00                  | 9.9E-01 |
| Arg         | *1.76                 | 3.5E-03 | 0.82                  | 1.7E-01 |
| Glu         | *1.20                 | 9.6E-03 | *1.21                 | 1.0E-02 |
| Trp         | *1.51                 | 2.1E-02 | 0.98                  | 9.3E-01 |
| Tyr         | *1.53                 | 6.0E-03 | 1.06                  | 5.8E-01 |
| Gly         | *0.87                 | 4.5E-03 | 1.10                  | 1.7E-01 |
| Ala         | *0.61                 | 2.0E-02 | 0.97                  | 7.2E-01 |
| Ser         | 0.96                  | 6.6E-01 | 1.20                  | 5.2E-02 |
| Pro         | 1.01                  | 9.1E-01 | *1.62                 | 2.0E-03 |
| Cit         | 0.71                  | 2.9E-01 | 1.06                  | 6.3E-01 |
| Asp         | *0.33                 | 1.1E-04 | 0.88                  | 1.2E-01 |

**Table S4. List of primers used in this study.**

| <b>Genes</b> | <b>Forward/ Reverse</b> | <b>Primer Sequences (5' to 3')</b> |
|--------------|-------------------------|------------------------------------|
| HSP70        | F                       | ATGTCGGTGGTGGGCATAGA               |
|              | R                       | CACAGCGACGTAGCAGCTCT               |
| TBP          | F                       | CGGTTTGCTGCGGTAATCAT               |
|              | R                       | TTTCTTGCTGCCAGTCTGGAC              |
| LDLR         | F                       | AAGTTCAAGTGTCACAGCGG               |
|              | R                       | CCGCACTCTTTGATGGGTTC               |
| ACSS2        | F                       | CGGGAATTCTGGGGAGACAT               |
|              | R                       | GCAGATGTTGGTAGTTGCTCC              |
| HMGCS1       | F                       | GGAACAGAGACAATCATCGACA             |
|              | R                       | GGAACAGAGACAATCATCGACA             |
| HMGCR        | F                       | AGTGACACTGACCATCTGCA               |
|              | R                       | AGGATGGCTATGCATCGTGT               |
| MVK          | F                       | AAGTGGACCTCAGCTTACCC               |
|              | R                       | TCTCCACTTGCTCTGAGGTG               |
| MVD          | F                       | CGATGAAGAGCTGGTTCTGC               |
|              | R                       | TCGGTGAAGTCCTTGCTGAT               |
| DHCR7        | F                       | CCCAACATTCCCAAAGCCAA               |
|              | R                       | CTCGCCAGTGAAAACCAGTC               |
| DHCR24       | F                       | CCGCTCTCGCTTATCTTCGA               |
|              | R                       | TCTTGCTACCCTGCTCCTTC               |
| SQLE         | F                       | TCATCACTTTGGCCAACAGG               |
|              | R                       | TATCCGAGAAGAGGGCGAAC               |
| PDGFRA       | F                       | TTT TTG TGA CGG TCT TGG AAG T      |
|              | R                       | TGT CTG AGT GTG GTT GTA ATA GC     |
| SOX10        | F                       | AGT ACC CGC ACC TGC ACA            |
|              | R                       | GAA GGG GCG CTT GTC ACT            |
| NEU4         | F                       | CCT TCA CGG ACA GTG CTC TT         |
|              | R                       | CTC CAC AAA GGC CAG CAG            |

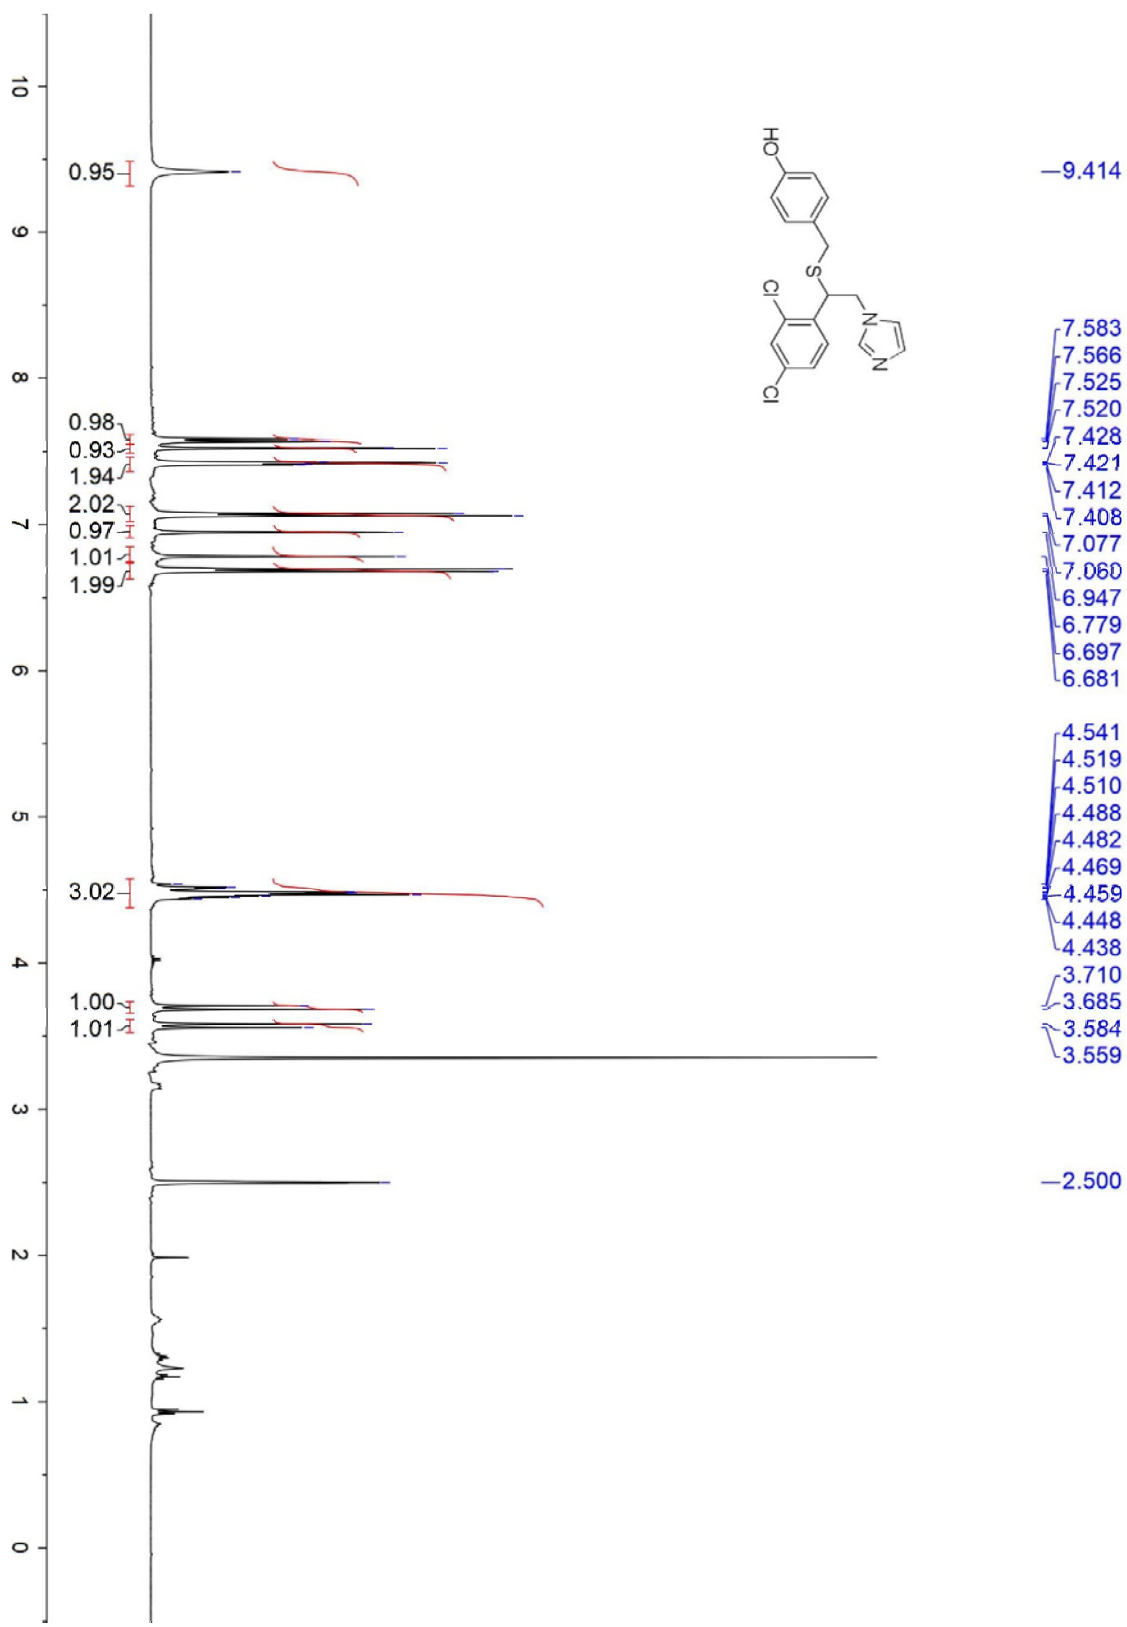

Data S1. <sup>1</sup>H NMR Spectrum of 7.

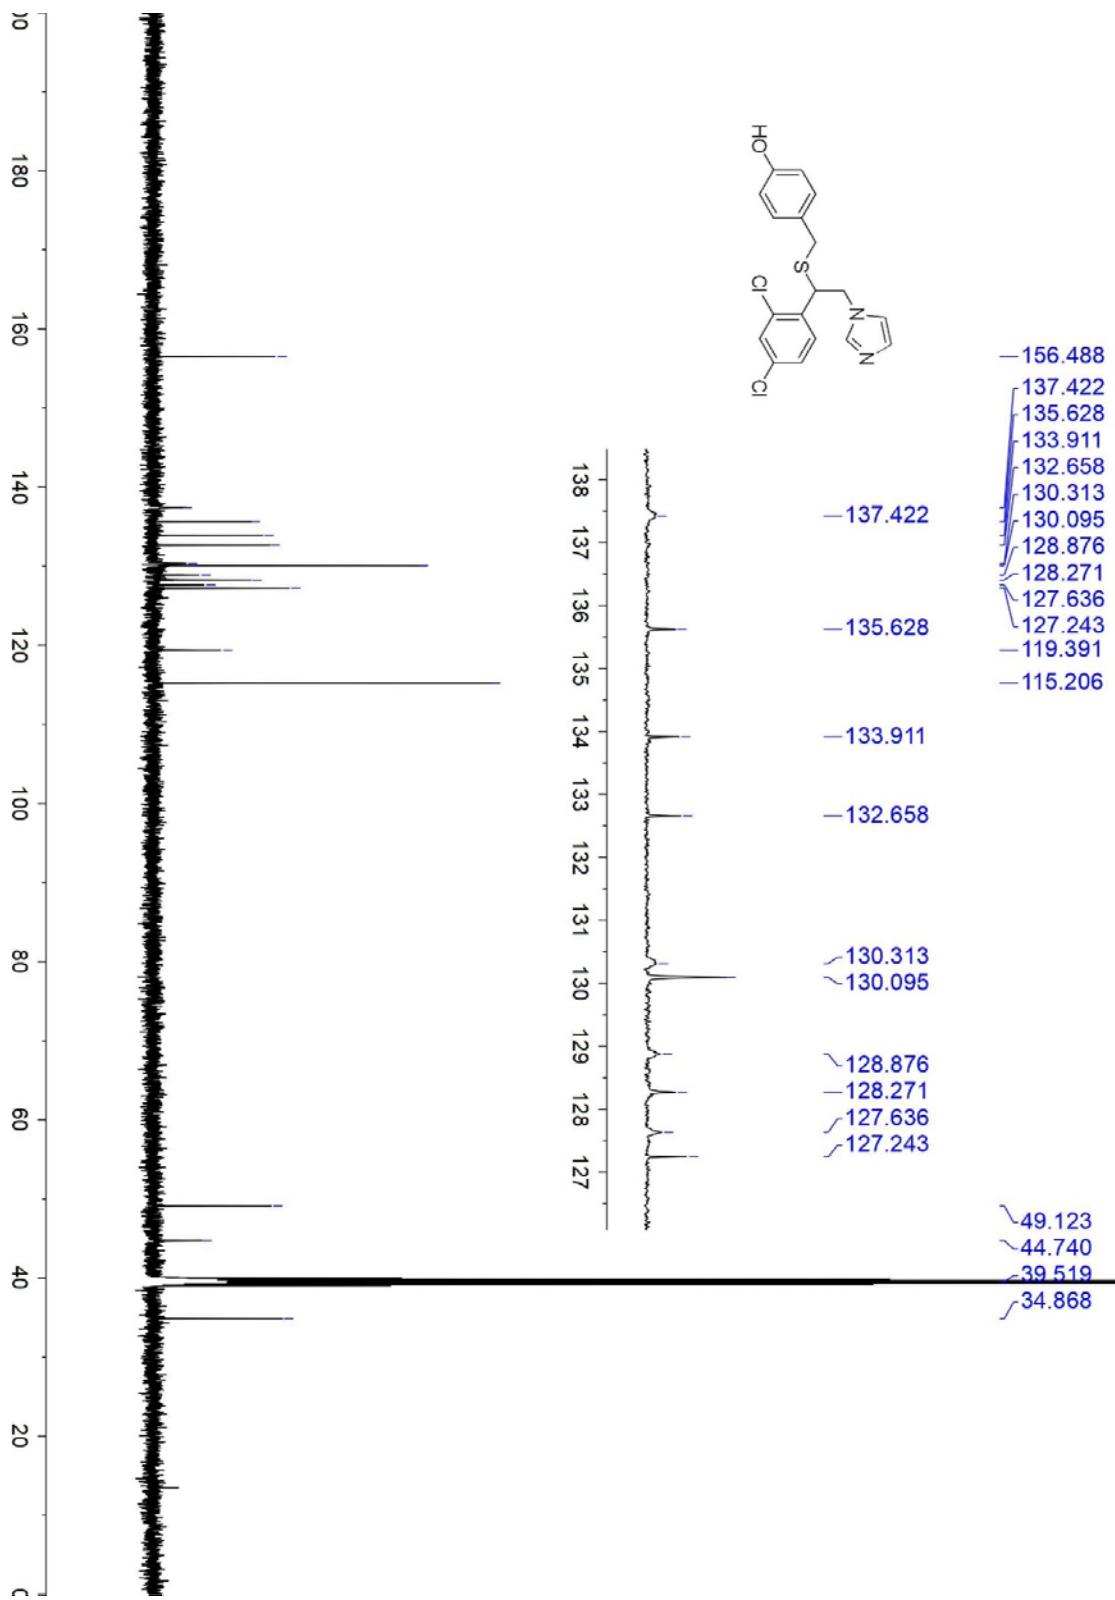

Data S2.  $^{13}\text{C}$  NMR Spectrum of 7.

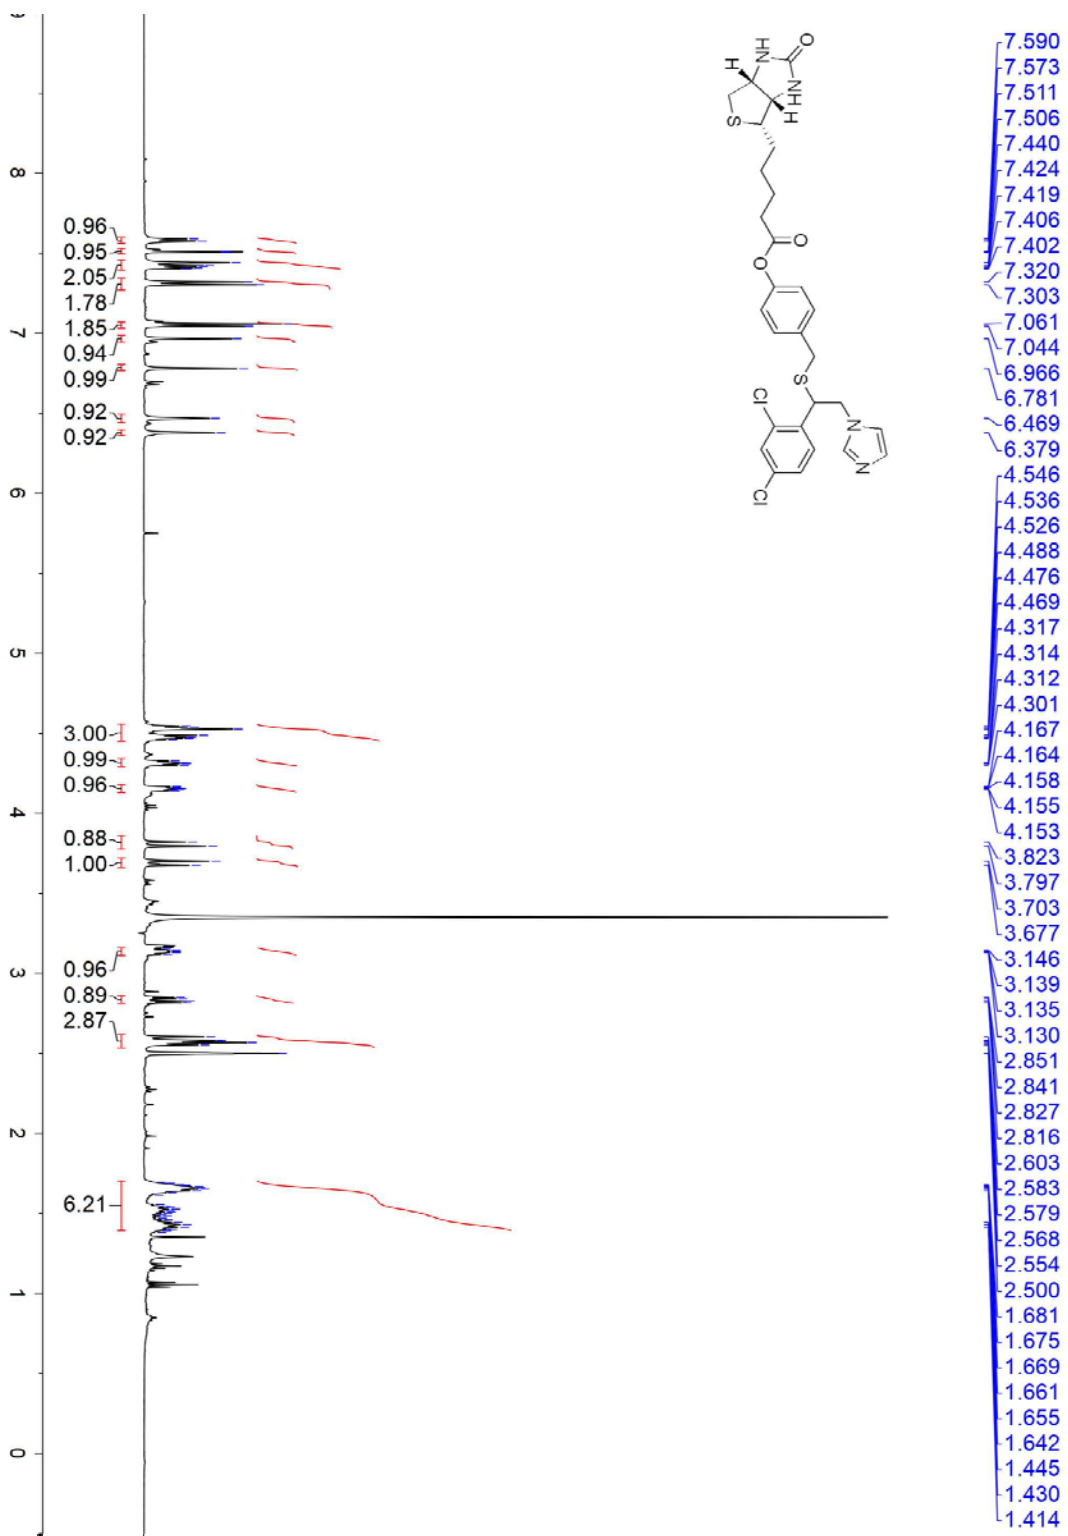

Data S3. <sup>1</sup>H NMR Spectrum of 8.

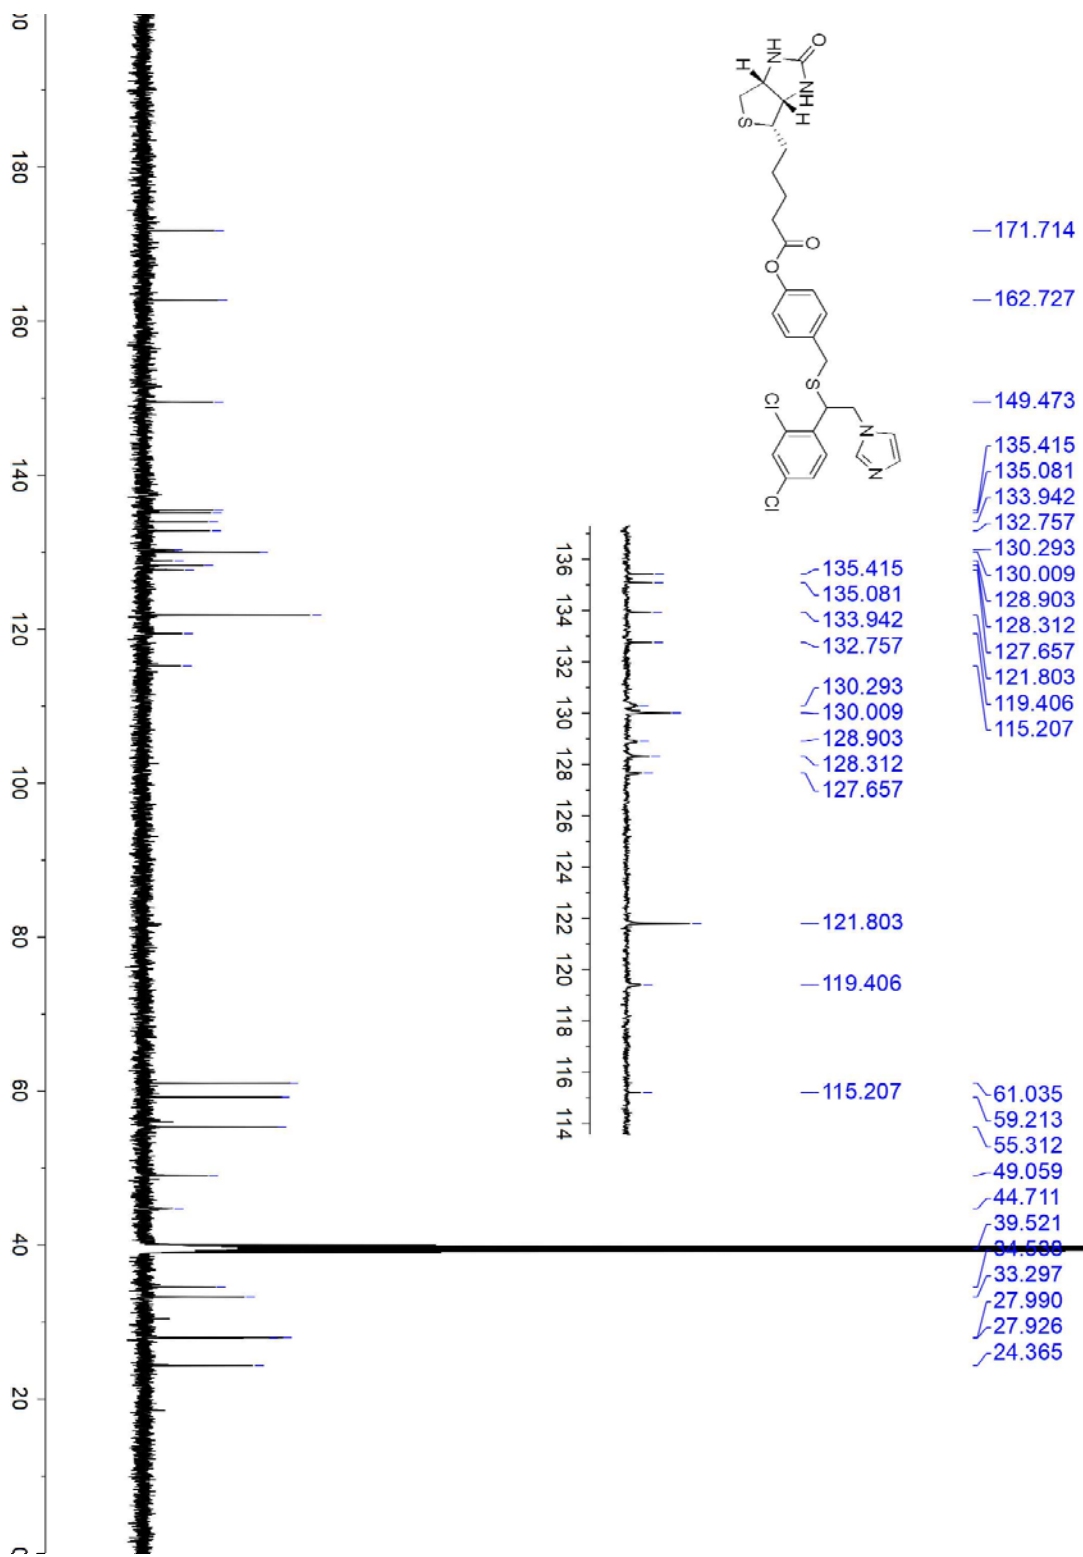

Data S4. <sup>13</sup>C NMR Spectrum of 8.

## REFERENCES AND NOTES

1. B. L. Hu, Q. Wang, Y. A. Wang, S. Hua, C.-E. G. Sauv e, D. Ong, Z. D. Lan, Q. Chang, Y. W. Ho, M. M. Monasterio, X. Lu, Y. Zhong, J. Zhang, P. Deng, Z. Tan, G. Wang, W.-T. Liao, L. J. Corley, H. Yan, J. Zhang, Y. You, N. Liu, L. Cai, G. Finocchiaro, J. J. Phillips, M. S. Berger, D. J. Spring, J. Hu, E. P. Sulman, G. N. Fuller, L. Chin, R. G. W. Verhaak, R. A. De Pinho, Epigenetic activation of WNT5A drives glioblastoma stem cell differentiation and invasive growth. *Cell* **167**, 1281–1295.e18 (2016).
2. D. S. T. Ong, B. Hu, Y. W. Ho, C. E. G. Sauv e, C. A. Bristow, Q. Wang, A. S. Multani, P. Chen, L. Nezi, S. Jiang, C. E. Gorman, M. M. Monasterio, D. Koul, M. Marchesini, S. Colla, E. J. Jin, E. P. Sulman, D. J. Spring, W. K. A. Yung, R. G. W. Verhaak, L. Chin, Y. A. Wang, R. A. DePinho, PAF promotes stemness and radioresistance of glioma stem cells. *Proc. Natl. Acad. Sci. U.S.A.* **114**, E9086–E9095 (2017).
3. J. Chen, Y. Li, T.-S. Yu, R. M. McKay, D. K. Burns, S. G. Kernie, L. F. Parada, A restricted cell population propagates glioblastoma growth after chemotherapy. *Nature* **488**, 522–526 (2012).
4. S. D. Bao, Q. Wu, R. E. Mc Lendon, Y. Hao, Q. Shi, A. B. Hjelmeland, M. W. Dewhirst, D. D. Bigner, J. N. Rich, Glioma stem cells promote radioresistance by preferential activation of the DNA damage response. *Nature* **444**, 756–760 (2006).
5. J. Bi, S. Chowdhry, S. Wu, W. Zhang, K. Masui, P. S. Mischel, Altered cellular metabolism in gliomas—An emerging landscape of actionable co-dependency targets. *Nat. Rev. Cancer* **20**, 57–70 (2020).
6. A. Leon-Del-Rio, Biotin in metabolism, gene expression, and human disease. *J. Inherit. Metab. Dis.* **42**, 647–654 (2019).
7. A. Hern andez-V azquez, B. Wolf, K. Pindolia, D Ortega-Cuellar, R Hern andez-Gonz alez, A Heredia-Ant unez, I Ibarra-Gonz alez, A Vel azquez-Arellano, Biotinidase knockout mice show cellular energy deficit and altered carbon metabolism gene expression similar to that of nutritional biotin deprivation: Clues for the pathogenesis in the human inherited disorder. *Mol. Genet. Metab.* **110**, 248–254 (2013).

8. E. Ochoa-Ruiz, R. Díaz-Ruiz, A. J. Hernández-Vázquez, I. Ibarra-González, A. Ortiz-Plata, D. Rembao, D. Ortega-Cuéllar, B. Viollet, S. Uribe-Carvajal, J. A. Corella, A. Velázquez-Arellano, Biotin deprivation impairs mitochondrial structure and function and has implications for inherited metabolic disorders. *Mol. Genet. Metab.* **116**, 204–214 (2015).
9. L. Tong, Structure and function of biotin-dependent carboxylases. *Cell. Mol. Life Sci.* **70**, 863–891 (2013).
10. J. Hymes, B. Wolf, Biotinidase and its roles in biotin metabolism. *Clin. Chim. Acta* **255**, 1–11 (1996).
11. N. Kothapalli, J. Zempleni, Biotinylation of histones depends on the cell cycle in NCI-H69 small cell lung cancer cells. *Faseb J.* **19**, A55 (2005).
12. Y. I. Hassan, J. Zempleni, Epigenetic regulation of chromatin structure and gene function by biotin. *J. Nutr.* **136**, 1763–1765 (2006).
13. M. A. Narang, R. Dumas, L. M. Ayer, R. A. Gravel, Reduced histone biotinylation in multiple carboxylase deficiency patients: A nuclear role for holocarboxylase synthetase. *Hum. Mol. Genet.* **13**, 15–23 (2004).
14. G. Russell-Jones, K. McTavish, J. McEwan, J. Rice, D. Nowotnik, Vitamin-mediated targeting as a potential mechanism to increase drug uptake by tumours. *J. Inorg. Biochem.* **98**, 1625–1633 (2004).
15. S. Chen, X. Zhao, J. Chen, J. Chen, L. Kuznetsova, S. S. Wong, I. Ojima, Mechanism-based tumor-targeting drug delivery system. Validation of efficient vitamin receptor-mediated endocytosis and drug release. *Bioconjug. Chem.* **21**, 979–987 (2010).
16. C. W. Brennan, R. G. W. Verhaak, A. McKenna, B. Campos, H. Noushmehr, S. R. Salama, S. Zheng, D. Chakravarty, J. Z. Sanborn, S. H. Berman, R. Beroukhi, B. Bernard, C. J. Wu, G. Genovese, I. Shmulevich, J. Barnholtz-Sloan, L. Zou, R. Vegesna, S. A. Shukla, G. Ciriello, W. K. Yung, W. Zhang, C. Sougnez, T. Mikkelsen, K. Aldape, D. D. Bigner, E. G. van Meir, M. Prados, A. Sloan, K. L. Black, J. Eschbacher, G. Finocchiaro, W. Friedman, D. W. Andrews, A. Guha, M. Iacocca, B. P. O'Neill, G. Foltz, J. Myers, D. J. Weisenberger, R. Penny, R. Kucherlapati, C. M. Perou, D. N. Hayes, R. Gibbs, M. Marra, G. B. Mills, E. Lander, P. Spellman, R. Wilson, C. Sander,



J. Weinstein, M. Meyerson, S. Gabriel, P. W. Laird, D. Haussler, G. Getz, L. Chin, C. Benz, J. Barnholtz-Sloan, W. Barrett, Q. Ostrom, Y. Wolinsky, K. L. Black, B. Bose, P. T. Boulos, M. Boulos, J. Brown, C. Czerinski, M. Eppley, M. Iacocca, T. Kempista, T. Kitko, Y. Koyfman, B. Rabeno, P. Rastogi, M. Sugarman, P. Swanson, K. Yalamanchii, I. P. Otey, Y. S. Liu, Y. Xiao, J. T. Auman, P. C. Chen, A. Hadjipanayis, E. Lee, S. Lee, P. J. Park, J. Seidman, L. Yang, R. Kucherlapati, S. Kalkanis, T. Mikkelsen, L. M. Poisson, A. Raghunathan, L. Scarpace, B. Bernard, R. Bressler, A. Eakin, L. Iype, R. B. Kreisberg, K. Leinonen, S. Reynolds, H. Rovira, V. Thorsson, I. Shmulevich, M. J. Annala, R. Penny, J. Paulauskis, E. Curley, M. Hatfield, D. Mallery, S. Morris, T. Shelton, C. Shelton, M. Sherman, P. Yena, L. Cuppini, F. DiMeco, M. Eoli, G. Finocchiaro, E. Maderna, B. Pollo, M. Saini, S. Balu, K. A. Hoadley, L. Li, C. R. Miller, Y. Shi, M. D. Topal, J. Wu, G. Dunn, C. Giannini, B. P. O'Neill, B. A. Aksoy, Y. Antipin, L. Borsu, S. H. Berman, C. W. Brennan, E. Cerami, D. Chakravarty, G. Ciriello, J. Gao, B. Gross, A. Jacobsen, M. Ladanyi, A. Lash, Y. Liang, B. Reva, C. Sander, N. Schultz, R. Shen, N. D. Socci, A. Viale, M. L. Ferguson, Q. R. Chen, J. A. Demchok, L. A. L. Dillon, K. R. M. Shaw, M. Sheth, R. Tarnuzzer, Z. Wang, L. Yang, T. Davidsen, M. S. Guyer, B. A. Ozenberger, H. J. Sofia, J. Bergsten, J. Eckman, J. Harr, J. Myers, C. Smith, K. Tucker, C. Winemiller, L. A. Zach, J. Y. Ljubimova, G. Eley, B. Ayala, M. A. Jensen, A. Kahn, T. D. Pihl, D. A. Pot, Y. Wan, J. Eschbacher, G. Foltz, N. Hansen, P. Hothi, B. Lin, N. Shah, J. G. Yoon, C. Lau, M. Berens, K. Ardlie, R. Beroukhim, S. L. Carter, A. D. Cherniack, M. Noble, J. Cho, K. Cibulskis, D. DiCara, S. Frazer, S. B. Gabriel, N. Gehlenborg, J. Gentry, D. Heiman, J. Kim, R. Jing, E. S. Lander, M. Lawrence, P. Lin, W. Mallard, M. Meyerson, R. C. Onofrio, G. Saksena, S. Schumacher, C. Sougnez, P. Stojanov, B. Tabak, D. Voet, H. Zhang, L. Zou, G. Getz, N. N. Dees, L. Ding, L. L. Fulton, R. S. Fulton, K. L. Kanchi, E. R. Mardis, R. K. Wilson, S. B. Baylin, D. W. Andrews, L. Harshyne, M. L. Cohen, K. Devine, A. E. Sloan, S. R. VandenBerg, M. S. Berger, M. Prados, D. Carlin, B. Craft, K. Ellrott, M. Goldman, T. Goldstein, M. Grifford, D. Haussler, S. Ma, S. Ng, S. R. Salama, J. Z. Sanborn, J. Stuart, T. Swatloski, P. Waltman, J. Zhu, R. Foss, B. Frentzen, W. Friedman, R. McTiernan, A. Yachnis, D. N. Hayes, C. M. Perou, S. Zheng, R. Vegesna, Y. Mao, R. Akbani, K. Aldape, O. Bogler, G. N. Fuller, W. Liu, Y. Liu, Y. Lu, G. Mills, A. Protopopov, X. Ren, Y. Sun, C. J. Wu, W. K. A. Yung, W. Zhang, J. Zhang, K. Chen, J. N. Weinstein, L. Chin, R. G. W. Verhaak, H. Noushmehr, D. J. Weisenberger, M. S. Bootwalla, P. H. Lai, T. J. Triche Jr, D. J. van den Berg, P. W. Laird, D. H. Gutmann, N. L. Lehman,

- E. G. VanMeir, D. Brat, J. J. Olson, G. M. Mastrogiannakis, N. S. Devi, Z. Zhang, D. Bigner, E. Lipp, R. McLendon, The somatic genomic landscape of glioblastoma. *Cell* **155**, 462–477 (2013).
17. R. G. W. Verhaak, K. A. Hoadley, E. Purdom, V. Wang, Y. Qi, M. D. Wilkerson, C. R. Miller, L. Ding, T. Golub, J. P. Mesirov, G. Alexe, M. Lawrence, M. O’Kelly, P. Tamayo, B. A. Weir, S. Gabriel, W. Winckler, S. Gupta, L. Jakkula, H. S. Feiler, J. Graeme Hodgson, C. D. James, J. N. Sarkaria, C. Brennan, A. Kahn, P. T. Spellman, R. K. Wilson, T. P. Speed, J. W. Gray, M. Meyerson, G. Getz, C. M. Perou, D. N. Hayes, Integrated genomic analysis identifies clinically relevant subtypes of glioblastoma characterized by abnormalities in PDGFRA, IDH1, EGFR, and NF1. *Cancer Cell* **17**, 98–110 (2010).
18. S. Mazzoleni, L. S. Politi, M. Pala, M. Cominelli, A. Franzin, L. Sergi Sergi, A. Falini, M. de Palma, A. Bulfone, P. L. Poliani, R. Galli, Epidermal growth factor receptor expression identifies functionally and molecularly distinct tumor-initiating cells in human glioblastoma multiforme and is required for gliomagenesis. *Cancer Res.* **70**, 7500–7513 (2010).
19. J. Lamb, E. D. Crawford, D. Peck, J. W. Modell, I. C. Blat, M. J. Wrobel, J. Lerner, J. P. Brunet, A. Subramanian, K. N. Ross, M. Reich, H. Hieronymus, G. Wei, S. A. Armstrong, S. J. Haggarty, P. A. Clemons, R. Wei, S. A. Carr, E. S. Lander, T. R. Golub, The connectivity map: Using gene-expression signatures to connect small molecules, genes, and disease. *Science* **313**, 1929–1935 (2006).
20. R. A. Fromtling, Overview of medically important antifungal azole derivatives. *Clin. Microbiol. Rev.* **1**, 187–217 (1988).
21. G. I. Lepesheva, L. Friggeri, M. R. Waterman, CYP51 as drug targets for fungi and protozoan parasites: Past, present and future. *Parasitology* **145**, 1820–1836 (2018).
22. F. Ahmad, Q. Sun, D. Patel, J. M. Stommel, Cholesterol metabolism: A potential therapeutic target in glioblastoma. *Cancer* **11**, 146 (2019).
23. G. R. Villa, J. J. Hulce, C. Zanca, J. Bi, S. Ikegami, G. L. Cahill, Y. Gu, K. M. Lum, K. Masui, H. Yang, X. Rong, C. Hong, K. M. Turner, F. Liu, G. C. Hon, D. Jenkins, M. Martini, A. M. Armando, O. Quehenberger, T. F. Cloughesy, F. B. Furnari, W. K. Cavenee, P. Tontonoz, T. C. Gahman, A. K.

- Shiau, B. F. Cravatt, P. S. Mischel, An LXR-cholesterol axis creates a metabolic co-dependency for brain cancers. *Cancer Cell* **30**, 683–693 (2016).
24. B. J. Burri, L. Sweetman, W. L. Nyhan, Heterogeneity of holocarboxylase synthetase in patients with biotin-responsive multiple carboxylase deficiency. *Am. J. Hum. Genet.* **37**, 326–337 (1985).
25. A. Hernández-Vázquez, E. Ochoa-Ruiz, I. Ibarra-González, D. Ortega-Cuellar, A. Salvador-Adriano, A. Velázquez-Arellano, Temporal development of genetic and metabolic effects of biotin deprivation. A search for the optimum time to study a vitamin deficiency. *Mol. Genet. Metab.* **107**, 345–351 (2012).
26. D. M. Mock, Biotin: From nutrition to therapeutics. *J. Nutr.* **147**, 1487–1492 (2017).
27. C.-W. Kim, C. Addy, J. Kusunoki, N. N. Anderson, S. Deja, X. Fu, S. C. Burgess, C. Li, M. Ruddy, M. Chakravarthy, S. Previs, S. Milstein, K. Fitzgerald, D. E. Kelley, J. D. Horton, Acetyl CoA carboxylase inhibition reduces hepatic steatosis but elevates plasma triglycerides in mice and humans: A bedside to bench investigation. *Cell Metab.* **26**, 394–406.e6 (2017).
28. Y. Shi, S. K. Lim, Q. Liang, S. V. Iyer, H.-Y. Wang, Z. Wang, X. Xie, D. Sun, Y.-J. Chen, V. Tabar, P. Gutin, N. Williams, J. K. De Brabander, L. F. Parada, Gboxin is an oxidative phosphorylation inhibitor that targets glioblastoma. *Nature* **567**, 341–346 (2019).
29. B. Dasgupta, R. R. Chhipa, Evolving lessons on the complex role of AMPK in normal physiology and cancer. *Trends Pharmacol. Sci.* **37**, 192–206 (2016).
30. F. Tang, Z. Yang, Y. Tan, Y. Li, Super-enhancer function and its application in cancer targeted therapy. *npj Precis. Oncol.* **4**, 2 (2020).
31. S. Darmanis, S. A. Sloan, D. Croote, M. Mignardi, S. Chernikova, P. Samghababi, Y. Zhang, N. Neff, M. Kowarsky, C. Caneda, G. Li, S. D. Chang, I. D. Connolly, Y. Li, B. A. Barres, M. H. Gephart, S. R. Quake, Single-cell RNA-Seq analysis of infiltrating neoplastic cells at the migrating front of human glioblastoma. *Cell Rep.* **21**, 1399–1410 (2017).
32. S. F. Suchy, B. Wolf, Effect of biotin deficiency and supplementation on lipid metabolism in rats: Cholesterol and lipoproteins. *Am. J. Clin. Nutr.* **43**, 831–838 (1986).

33. I. Marin-Valencia, C. Yang, T. Mashimo, S. Cho, H. Baek, X.-L. Yang, K. N. Rajagopalan, M. Maddie, V. Vemireddy, Z. Zhao, L. Cai, L. Good, B. P. Tu, K. J. Hatanpaa, B. E. Mickey, J. M. Matés, J. M. Pascual, E. A. Maher, C. R. Malloy, R. J. DeBerardinis, R. M. Bachoo, Analysis of tumor metabolism reveals mitochondrial glucose oxidation in genetically diverse human glioblastomas in the mouse brain in vivo. *Cell Metab.* **15**, 827–837 (2012).
34. J. E. C. Jones, W. P. Esler, R. Patel, A. Lanba, N. B. Vera, J. A. Pfefferkorn, C. Vernochet, Inhibition of acetyl-CoA carboxylase 1 (ACC1) and 2 (ACC2) reduces proliferation and de novo lipogenesis of EGFRvIII human glioblastoma cells. *PLOS ONE* **12**, e0169566 (2017).
35. F. Röhrig, A. Schulze, The multifaceted roles of fatty acid synthesis in cancer. *Nat. Rev. Cancer* **16**, 732–749 (2016).
36. M. Murakami, Y. Ushio, Y. Mihara, J.-I. Kuratsu, S. Horiuchi, Y. Morino, Cholesterol uptake by human glioma cells via receptor-mediated endocytosis of low-density lipoprotein. *J. Neurosurg.* **73**, 760–767 (1990).
37. E. M. Smith, J. T. Hoi, J. C. Eissenberg, J. D. Shoemaker, W. S. Neckameyer, A. M. Ivarson, L. G. Harshman, V. L. Schlegel, J. Zempleni, Feeding *Drosophila* a biotin-deficient diet for multiple generations increases stress resistance and lifespan and alters gene expression and histone Biotinylation patterns. *J. Nutr.* **137**, 2006–2012 (2007).
38. S. Nagaraja, N. A. Vitanza, P. J. Woo, K. R. Taylor, F. Liu, L. Zhang, M. Li, W. Meng, A. Ponnuswami, W. Sun, J. Ma, E. Hulleman, T. Swigut, J. Wysocka, Y. Tang, M. Monje, Transcriptional dependencies in diffuse intrinsic pontine glioma. *Cancer Cell* **31**, 635–652.e6 (2017).
39. R. C. Gimple, R. L. Kidwell, L. J. Y. Kim, T. Sun, A. D. Gromovsky, Q. Wu, M. Wolf, D. Lv, S. Bhargava, L. Jiang, B. C. Prager, X. Wang, Q. Ye, Z. Zhu, G. Zhang, Z. Dong, L. Zhao, D. Lee, J. Bi, A. E. Sloan, P. S. Mischel, J. M. Brown, H. Cang, T. Huan, S. C. Mack, Q. Xie, J. N. Rich, Glioma stem cell-specific superenhancer promotes polyunsaturated fatty-acid synthesis to support EGFR signaling. *Cancer Discov.* **9**, 1248–1267 (2019).

40. C. Dravis, B. T. Spike, J. C. Harrell, C. Johns, C. L. Trejo, E. M. Southard-Smith, C. M. Perou, G. M. Wahl, Sox10 regulates stem/progenitor and mesenchymal cell states in mammary epithelial cells. *Cell Rep.* **12**, 2035–2048 (2015).
41. I. Silvestri, F. Testa, R. Zappasodi, C. W. Cairo, Y. Zhang, B. Lupo, R. Galli, M. Di Nicola, B. Venerando, C. Tringali, Sialidase NEU4 is involved in glioblastoma stem cell survival. *Cell Death Dis.* **5**, e1381 (2014).
42. W. Sukjoi, S. Siritutsoontorn, P. Chansongkrow, S. Waiwitlikhit, S. W. Polyak, M. Warnnissorn, V. Charoensawan, C. Thuwajit, S. Jitrapakdee, Overexpression of holocarboxylase synthetase predicts lymph node metastasis and unfavorable prognosis in breast cancer. *Anticancer Res.* **40**, 4557–4565 (2020).
43. L. Chen, P. Jenjaroenpun, A. M. C. Pillai, A. V. Ivshina, G. S. Ow, M. Efthimios, T. Zhiquan, T. Z. Tan, S.-C. Lee, K. Rogers, J. M. Ward, S. Mori, D. J. Adams, N. A. Jenkins, N. G. Copeland, K. H.-K. Ban, V. A. Kuznetsov, J. P. Thiery, Transposon insertional mutagenesis in mice identifies human breast cancer susceptibility genes and signatures for stratification. *Proc. Natl. Acad. Sci. U.S.A.* **114**, E2215–E2224 (2017).
44. O. V. Grinchuk, S. P. Yenamandra, R. Iyer, M. Singh, H. K. Lee, K. H. Lim, P. K.-H. Chow, V. A. Kuznetsov, Tumor-adjacent tissue co-expression profile analysis reveals pro-oncogenic ribosomal gene signature for prognosis of resectable hepatocellular carcinoma. *Mol. Oncol.* **12**, 89–113 (2018).
45. S. C. Mack, I. Singh, X. Wang, R. Hirsch, Q. Wu, R. Villagomez, J. A. Bernatchez, Z. Zhu, R. C. Gimple, L. J. Y. Kim, A. Morton, S. Lai, Z. Qiu, B. C. Prager, K. C. Bertrand, C. Mah, W. Zhou, C. Lee, G. H. Barnett, M. A. Vogelbaum, A. E. Sloan, L. Chavez, S. Bao, P. C. Scacheri, J. L. Siqueira-Neto, C. Y. Lin, J. N. Rich, Chromatin landscapes reveal developmentally encoded transcriptional states that define human glioblastoma. *J. Exp. Med.* **216**, 1071–1090 (2019).
46. R. L. Bowman, Q. Wang, A. Carro, R. G. W. Verhaak, M. Squatrito, GlioVis data portal for visualization and analysis of brain tumor expression datasets. *Neuro Oncol.* **19**, 139–141 (2017).
47. Z. Gu, R. Eils, M. Schlesner, Complex heatmaps reveal patterns and correlations in multidimensional genomic data. *Bioinformatics* **32**, 2847–2849 (2016).

48. A. Šali, T. L. Blundell, Comparative protein modelling by satisfaction of spatial restraints. *J. Mol. Biol.* **234**, 779–815 (1993).
49. S. Kannan, M. R. Pradhan, G. Tiwari, W.-C. Tan, B. Chowbay, E. H. Tan, D. S.-W. Tan, C. Verma, Hydration effects on the efficacy of the epidermal growth factor receptor kinase inhibitor afatinib. *Sci. Rep.* **7**, 1540 (2017).
50. J. Lescar, I. Meyer, K. Akshita, K. Srinivasaraghavan, C. Verma, M. Palous, D. Mazier, A. Datry, A. Fekkar, *Aspergillus fumigatus* harbouring the sole Y121F mutation shows decreased susceptibility to voriconazole but maintained susceptibility to itraconazole and posaconazole. *J. Antimicrob. Chemother.* **69**, 3244–3247 (2014).
51. T. Darden, D. York, L. Pedersen, Particle mesh Ewald: An  $N \cdot \log(N)$  method for Ewald sums in large systems. *J. Chem. Phys.* **98**, 10089–10092 (1993).
52. S. Miyamoto, P. A. Kollman, Settle: An analytical version of the SHAKE and RATTLE algorithm for rigid water models. *J. Comput. Chem.* **13**, 952–962 (1992).
53. B. Li, C. N. Dewey, RSEM: Accurate transcript quantification from RNA-Seq data with or without a reference genome. *BMC Bioinformatics* **12**, 323 (2011).
54. D. M. Muoio, R. C. Noland, J.-P. Kovalik, S. E. Seiler, M. N. Davies, K. L. DeBalsi, O. R. Ilkayeva, R. D. Stevens, I. Kheterpal, J. Zhang, J. D. Covington, S. Bajpeyi, E. Ravussin, W. Kraus, T. R. Koves, R. L. Mynatt, Muscle-specific deletion of carnitine acetyltransferase compromises glucose tolerance and metabolic flexibility. *Cell Metab.* **15**, 764–777 (2012).
55. C. B. Newgard, J. An, J. R. Bain, M. J. Muehlbauer, R. D. Stevens, L. F. Lien, A. M. Haqq, S. H. Shah, M. Arlotto, C. A. Slentz, J. Rochon, D. Gallup, O. Ilkayeva, B. R. Wenner, W. S. Yancy Jr., H. Eisenson, G. Musante, R. S. Surwit, D. S. Millington, M. D. Butler, L. P. Svetkey, A branched-chain amino acid-related metabolic signature that differentiates obese and lean humans and contributes to insulin resistance. *Cell Metab.* **9**, 311–326 (2009).
56. S. K. Bowman, M. D. Simon, A. M. Deaton, M. Tolstorukov, M. L. Borowsky, R. E. Kingston, Multiplexed Illumina sequencing libraries from picogram quantities of DNA. *BMC Genomics* **14**, 466 (2013).

57. S. Madhavan, J.-C. Zenklusen, Y. Kotliarov, H. Sahni, H. A. Fine, K. Buetow, Rembrandt: Helping personalized medicine become a reality through integrative translational research. *Mol. Cancer Res.* **7**, 157–167 (2009).
58. L. A. M. Gravendeel, M. C. M. Kouwenhoven, O. Gevaert, J. J. de Rooi, A. P. Stubbs, J. E. Duijm, A. Daemen, F. E. Bleeker, L. B. C. Bralten, N. K. Kloosterhof, B. De Moor, P. H. C. Eilers, P. J. van der Spek, J. M. Kros, P. A. E. Sillevius Smitt, M. J. van den Bent, P. J. French, Intrinsic gene expression profiles of gliomas are a better predictor of survival than histology. *Cancer Res.* **69**, 9065–9072 (2009).
59. Y. Wang, T. Qian, G. You, X. Peng, C. Chen, Y. You, K. Yao, C. Wu, J. Ma, Z. Sha, S. Wang, T. Jiang, Localizing seizure-susceptible brain regions associated with low-grade gliomas using voxel-based lesion-symptom mapping. *Neuro Oncol.* **17**, 282–288 (2015).
60. Roadmap Epigenomics Consortium, Integrative analysis of 111 reference human epigenomes. *Nature* **518**, 317–330 (2015).
61. A. Butler, P. Hoffman, P. Smibert, E. Papalexi, R. Satija, Integrating single-cell transcriptomic data across different conditions, technologies, and species. *Nat. Biotechnol.* **36**, 411–420 (2018).
62. M. S. Y. Tan, E. Sandanaraj, Y. K. Chong, S. W. Lim, L. W. H. Koh, W. H. Ng, N. S. Tan, P. Tan, B. T. Ang, C. Tang, A STAT3-based gene signature stratifies glioma patients for targeted therapy. *Nat. Commun.* **10**, 3601 (2019).
